# Supplementary material for: Genetic determinants in the development of sensitization to environmental allergens in early childhood
Source: PubMed Central journal article supplement (PMC4257764; doi:10.1002/iid3.38), 2014-11-20
Supplement: iid30002-0193-sd1.pdf [file iid30002-0193-sd1.pdf]

**Table S1.** List of selected genes, SNPs, location and predicted function

| SNP | SNP ID     | Alleles | Gene     | Chr | Position  | Regulome DB Score | Feature                                                                  |
|-----|------------|---------|----------|-----|-----------|-------------------|--------------------------------------------------------------------------|
| 1   | rs10047107 | G/T     | FCER1A   | 1   | 157527883 | No Data           | intron[NM_002001.2]                                                      |
| 2   | rs10052211 | A/C     | SPINK5   | 5   | 147434334 | No Data           | intron[NM_006846.2]                                                      |
| 3   | rs10062167 | C/T     | SPINK5   | 5   | 147489132 | No Data           | intron[NM_006846.2]                                                      |
| 4   | rs1007636  | C/T     | HLA-DMB  | 6   | 33012019  | No Data           | intron[NM_002118.3]                                                      |
| 5   | rs1008723  | G/T     | GSDML    | 17  | 35319793  | 6                 | intron[NM_018530.2]                                                      |
| 6   | rs10121491 | C/T     | JAK2     | 9   | 5036935   | 6                 | intron[NM_004972.2]                                                      |
| 7   | rs10169916 | G/T     | ALOX15   | 2   | 113320199 | 1f                | Downstream                                                               |
| 8   | rs10192036 | A/C     | IL1RL1   | 2   | 102334643 | 5                 | missense[NM_016232.4]                                                    |
| 9   | rs10202402 | C/G     | DPP10    | 2   | 116317944 | No Data           | utr-3[NM_020868.2]                                                       |
| 10  | rs10205485 | A/T     | SDC1     | 2   | 20267275  | 5                 | missense[NM_002997.4];missense[NM_001006946.1];reference[NM_001006946.1] |
| 11  | rs10220622 | C/T     | CMA1     | 14  | 24046810  | 5                 | intron[NM_001836.2]                                                      |
| 12  | rs1024610  | A/T     | CCL2     | 17  | 29604344  | 4                 |                                                                          |
| 13  | rs10267935 | A/C     | NPSR1    | 7   | 34852028  | 5                 | intron[NM_207172.1]                                                      |
| 14  | rs1026916  | A/G     | STAT3    | 17  | 37783361  | No Data           | intron[NM_213662.1]; intron[NM_139276.2]                                 |
| 15  | rs10271556 | C/T     | NAMPT    | 7   | 105686110 | 6                 | intron[NM_005746.2]                                                      |
| 16  | rs1036199  | A/C     | HAVCR2   | 5   | 156464314 | No Data           | reference[NM_032782.3]                                                   |
| 17  | rs10399805 | A/G     | CHI3L1   | 1   | 201422621 | 1f                | near-gene-5[NM_001276.2]                                                 |
| 18  | rs10399931 | C/T     | CHI3L1   | 1   | 201422703 | 1f                | near-gene-5[NM_001276.2]                                                 |
| 19  | rs1041973  | A/C     | IL1RL1   | 2   | 102321900 | 5                 | missense[NM_003856.2];missense[NM_016232.4];reference[NM_016232.4]       |
| 20  | rs1042337  | C/T     | HLA-DMB  | 6   | 33012959  | No Data           | reference[NM_002118.3]                                                   |
| 21  | rs1042720  | A/G/T   | ADRB2    | 5   | 148187826 | 4                 | coding-synonymous[NM_000024.4]                                           |
| 22  | rs1043261  | C/T     | IL17RB   | 3   | 53874316  | 6                 | reference[NM_018725.3];near-gene-3[NM_022899.3]                          |
| 23  | rs10488854 | A/G     | GC       | 4   | 72842999  | 6                 | intron[NM_000583.2]                                                      |
| 24  | rs10491652 | A/G     | JAK2     | 9   | 5099531   | 5                 | intron[NM_004972.2]                                                      |
| 25  | rs10507391 | A/T     | ALOX5AP  | 13  | 30210096  | 5                 | intron[NM_001629.2]                                                      |
| 26  | rs1050900  | A/T     | HNMT     | 2   | 138488388 | No Data           | utr-3[NM_006895.2]                                                       |
| 27  | rs10515746 | A/C     | HAVCR2   | 5   | 156469146 | 5                 | near-gene-5[NM_032782.3]                                                 |
| 28  | rs1051594  | C/T     | MS4A1    | 11  | 59994630  | 6                 | utr-3[NM_152866.2]                                                       |
| 29  | rs10515944 | A/C     | CD28     | 2   | 204295514 | 4                 | intron[NM_006139.1]                                                      |
| 30  | rs1051740  | C/T     | EPHX1    | 1   | 224086256 | 5                 | missense[NM_000120.2]                                                    |
| 31  | rs1051741  | C/T     | EPHX1    | 1   | 224098852 | 4                 | reference[NM_000120.2]; near-gene-3[NM_014698.1]                         |
| 32  | rs1057141  | A/G     | TAP1     | 6   | 32926752  | 6                 | reference[NM_000593.5]                                                   |
| 33  | rs1058240  | A/G     | GATA3    | 10  | 8156604   | 5                 | utr-3[NM_002051.2]                                                       |
| 34  | rs1061622  | G/T     | TNFRSF1B | 1   | 12175542  | 1f                | missense[NM_001066.2]                                                    |
| 35  | rs1061624  | A/G     | TNFRSF1B | 1   | 12189852  | 5                 | utr-3[NM_001066.2]                                                       |
| 36  | rs1063478  | C/T     | HLA-DMA  | 6   | 33025522  | No Data           | missense[NM_006120.2]                                                    |
| 37  | rs2427837  | A/G     | FCER1A   | 1   | 157525169 | No Data           | near-gene-5[NM_002001.2]                                                 |
| 38  | rs10751    | C/T     | HLA-DMB  | 6   | 33010561  | No Data           | utr-3[NM_002118.3]                                                       |

|    |            |     |           |    |           |         |                                                                    |
|----|------------|-----|-----------|----|-----------|---------|--------------------------------------------------------------------|
| 39 | rs10752126 | C/G | GATA3     | 10 | 8146753   | 4       | intron[NM_002051.2]                                                |
| 40 | rs1075623  | C/T | IL4R      | 16 | 27238438  | No Data | intron[NM_001008699.1]                                             |
| 41 | rs1077861  | A/T | NOD2      | 16 | 49317048  | 6       | intron[NM_022162.1]                                                |
| 42 | rs10781522 | A/G | TRAF2     | 9  | 138934874 | 5       | intron[NM_021138.3]                                                |
| 43 | rs10783218 | C/T | VDR       | 12 | 46559010  | No Data | intron[NM_000376.2]                                                |
| 44 | rs10789166 | A/G | JAK1      | 1  | 65085401  | 5       | intron[NM_002227.2]                                                |
| 45 | rs10815148 | A/T | JAK2      | 9  | 5047284   | 5       | intron[NM_004972.2]                                                |
| 46 | rs10815160 | G/T | JAK2      | 9  | 5106616   | 6       | intron[NM_004972.2]                                                |
| 47 | rs10817704 | A/G | TNC       | 9  | 116847901 | No Data | intron[NM_002160.2]                                                |
| 48 | rs10856838 | A/T | TLR10     | 4  | 38453568  | 1f      | coding-synonymous[NM_030956.2]                                     |
| 49 | rs10870140 | C/T | TRAF2     | 9  | 138916240 | 2b      | intron[NM_021138.3]                                                |
| 50 | rs10889502 | C/G | JAK1      | 1  | 65152570  | 5       | intron[NM_002227.2]                                                |
| 51 | rs10905277 | A/G | GATA3     | 10 | 8137374   | 4       | utr-5[NM_002051.2]                                                 |
| 52 | rs10932017 | C/T | CD28      | 2  | 204286150 | No Data | intron[NM_006139.1]                                                |
| 53 | rs10940495 | A/G | IL6ST     | 5  | 55298417  | No Data | intron[NM_002184.2]                                                |
| 54 | rs10974939 | G/T | JAK2      | 9  | 5046482   | 6       | intron[NM_004972.2]                                                |
| 55 | rs10983756 | C/T | TLR4      | 9  | 119513001 | No Data | intron[NM_138554.2]                                                |
| 56 | rs11079339 | A/G | EPX       | 17 | 53625441  | 1f      | reference[NM_000502.2]                                             |
| 57 | rs11079786 | A/G | LOC678655 | 17 | 43160915  | 5       | -                                                                  |
| 58 | rs11168293 | G/T | VDR       | 12 | 46579983  | 6       | intron[NM_000376.2]                                                |
| 59 | rs11172106 | C/G | GPR108    | 12 | 55799142  | 3a      | -                                                                  |
| 60 | rs11208534 | A/G | JAK1      | 1  | 65115654  | 5       | intron[NM_002227.2]                                                |
| 61 | rs11208537 | A/T | JAK1      | 1  | 65156220  | 5       | intron[NM_002227.2]                                                |
| 62 | rs11208545 | G/T | JAK1      | 1  | 65171469  | 5       | intron[NM_002227.2]                                                |
| 63 | rs11208549 | A/G | JAK1      | 1  | 65175697  | No Data | intron[NM_002227.2]                                                |
| 64 | rs11241090 | A/G | TSLP      | 5  | 110437565 | 5       | intron[NM_138551.2]                                                |
| 65 | rs11260014 | C/G | FCER2     | 19 | 7665715   | 4       | intron[NM_002002.3]                                                |
| 66 | rs1126579  | C/T | IL8RB     | 2  | 218708979 | 6       | utr-3[NM_001557.2]                                                 |
| 67 | rs1129055  | A/G | CD86      | 3  | 123321009 | No Data | missense[NM_006889.3];missense[NM_175862.3];reference[NM_175862.3] |
| 68 | rs1131535  | A/G | TNFSF10   | 3  | 173706769 | 5       | utr-3[NM_003810.2]                                                 |
| 69 | rs1131882  | A/G | TBXA2R    | 19 | 3546923   | 5       | coding-synonymous[NM_001060.4]                                     |
| 70 | rs1134597  | A/G | NLRC3     | 16 | 3529111   | 6       | utr-3[NM_178844.2]                                                 |
| 71 | rs1135216  | A/G | TAP1      | 6  | 32922953  | 4       | reference[NM_000593.5]                                             |
| 72 | rs11421    | C/T | FCER1G    | 1  | 159455560 | 1f      | utr-3[NM_004106.1]                                                 |
| 73 | rs1143627  | C/T | IL1B      | 2  | 113310858 | 1b      | near-gene-5[NM_000576.2]                                           |
| 74 | rs1143633  | A/G | IL1B      | 2  | 113306938 | No Data | intron[NM_000576.2]                                                |
| 75 | rs1143634  | C/T | IL1B      | 2  | 113306861 | 5       | reference[NM_000576.2]                                             |
| 76 | rs1143643  | A/G | IL1B      | 2  | 113304773 | 6       | intron[NM_000576.2]                                                |
| 77 | rs11465350 | C/T | CCL26     | 7  | 75236704  | 6       | near-gene-3[NM_006072.4]                                           |
| 78 | rs11465353 | G/T | CCL26     | 7  | 75236585  | No Data | near-gene-3[NM_006072.4]                                           |
| 79 | rs11465527 | C/T | GPR108    | 6  | 52219379  | 6       | -                                                                  |
| 80 | rs11465545 | C/G | IL17F     | 6  | 52215864  | No Data | intron[NM_052872.3]                                                |

|     |            |     |         |    |           |         |                                            |
|-----|------------|-----|---------|----|-----------|---------|--------------------------------------------|
| 81  | rs11466311 | C/T | B9D2    | 19 | 46553588  | 5       | intron[NM_030578.2]                        |
| 82  | rs11466741 | C/T | TSLP    | 5  | 110436604 | 5       | near-gene-5[NM_138551.2]                   |
| 83  | rs11466744 | G/T | TSLP    | 5  | 110437865 | 5       | intron[NM_033035.3]                        |
| 84  | rs11466749 | A/G | TSLP    | 5  | 110440484 | No Data | utr-3[NM_138551.2]                         |
| 85  | rs11466750 | A/G | TSLP    | 5  | 110440793 | 6       | utr-3[NM_033035.3]                         |
| 86  | rs11536887 | A/G | TLR4    | 9  | 119517495 | 6       | utr-3[NM_138554.2]                         |
| 87  | rs11553746 | C/T | ACPI    | 2  | 262203    | 5       | missense[NM_001040649.1]                   |
| 88  | rs11557467 | G/T | ZBPB2   | 17 | 35282160  | 5       | missense[NM_198844.2]                      |
| 89  | rs11567933 | A/T | GATA3   | 10 | 8153086   | 5       | intron[NM_002051.2]                        |
| 90  | rs11569304 | A/C | CD40    | 20 | 44180717  | 4       | intron[NM_152854.2]                        |
| 91  | rs11569323 | C/T | CD40    | 20 | 44185711  | No Data | intron[NM_001250.4]                        |
| 92  | rs11569562 | C/T | C3      | 19 | 6629753   | 4       | intron[NM_000064.2]                        |
| 93  | rs11574141 | C/G | VDR     | 12 | 46521297  | 5       | near-gene-3[NM_001017535.1]                |
| 94  | rs11574845 | G/T | NFKB2   | 10 | 104146373 | 4       | intron[NM_002502.3];intron[NM_001077494.1] |
| 95  | rs11574849 | A/G | NFKB2   | 10 | 104149686 | 2b      | intron[NM_002502.3];intron[NM_001077494.1] |
| 96  | rs11575812 | C/T | IL2     | 4  | 123590499 | 6       | near-gene-3[NM_000586.3]                   |
| 97  | rs11587213 | A/G | FCER1G  | 1  | 159451499 | No Data | near-gene-5[NM_004106.1]                   |
| 98  | rs11650354 | C/T | TBX21   | 17 | 43177091  | 1f      | intron[NM_013351.1]                        |
| 99  | rs11652709 | C/G | EPX     | 17 | 53626093  | 5       | missense[NM_000502.2]                      |
| 100 | rs11657479 | C/T | TBX21   | 17 | 43177900  | 5       | utr-3[NM_013351.1]                         |
| 101 | rs11681540 | A/G | DPP10   | 2  | 116132254 | 6       | intron[NM_001004360.2]                     |
| 102 | rs11713419 | A/G | IL5RA   | 3  | 3125267   | 6       | utr-5[NM_175728.1]                         |
| 103 | rs11717893 | C/T | CD86    | 3  | 123289515 | No Data | intron[NM_006889.3]                        |
| 104 | rs11739089 | C/T | CNOT6   | 5  | 179938020 | 6       | near-gene-3[NM_015455.3]                   |
| 105 | rs11788963 | A/C | JAK2    | 9  | 5110157   | 6       | intron[NM_004972.2]                        |
| 106 | rs1181388  | C/T | CD28    | 2  | 204284196 | 5       | intron[NM_006139.1]                        |
| 107 | rs1181390  | A/C | CD28    | 2  | 204280922 | No Data | intron[NM_006139.1]                        |
| 108 | rs11864220 | A/G | IL4R    | 16 | 27253240  | No Data | intron[NM_001008699.1]                     |
| 109 | rs11883722 | A/G | ICOS    | 2  | 204509090 | No Data | near-gene-5[NM_012092.2]                   |
| 110 | rs11889031 | C/T | DEFB1   | 2  | 204507639 | 6       | -                                          |
| 111 | rs11916344 | C/T | C3orf1  | 3  | 120725842 | No Data | near-gene-3[NM_016589.3]                   |
| 112 | rs11967235 | C/T | HLA-DOB | 6  | 32889411  | 5       | intron[NM_002120.3]                        |
| 113 | rs12005893 | C/G | JAK2    | 9  | 5068046   | No Data | intron[NM_004972.2]                        |
| 114 | rs12005968 | G/T | JAK2    | 9  | 5116542   | No Data | intron[NM_004972.2]                        |
| 115 | rs12031995 | C/T | JAK1    | 1  | 65165333  | 6       | intron[NM_002227.2]                        |
| 116 | rs12063205 | A/G | JAK1    | 1  | 65144640  | No Data | intron[NM_002227.2]                        |
| 117 | rs12066872 | C/T | CHRM3   | 1  | 237955156 | 6       | intron[NM_000740.2]                        |
| 118 | rs1208     | A/G | NAT2    | 8  | 18302596  | 6       | missense[NM_000015.2]                      |
| 119 | rs12083537 | A/G | IL6R    | 1  | 152647727 | 2a      | intron[NM_181359.1]                        |
| 120 | rs12094497 | A/G | FCER1G  | 1  | 159452927 | 5       | intron[NM_004106.1]                        |
| 121 | rs12100565 | A/T | CMA1    | 14 | 24044760  | 5       | intron[NM_001836.2]                        |
| 122 | rs12135788 | G/T | FCER1A  | 1  | 157531167 | 6       | intron[NM_002001.2]                        |

|     |            |     |          |    |           |         |                                                                       |
|-----|------------|-----|----------|----|-----------|---------|-----------------------------------------------------------------------|
| 123 | rs12201582 | A/C | IL17F    | 6  | 52212648  | No Data | intron[NM_052872.3]                                                   |
| 124 | rs12339666 | G/T | JAK2     | 9  | 5053296   | No Data | intron[NM_004972.2]                                                   |
| 125 | rs12368672 | C/G | IL12RB1  | 12 | 55798737  | 6       | -                                                                     |
| 126 | rs12401767 | A/G | IL6      | 1  | 111631320 | 4       | -                                                                     |
| 127 | rs12409333 | A/G | JAK1     | 1  | 65190427  | 3a      | intron[NM_002227.2]                                                   |
| 128 | rs1243963  | C/T | GATA3    | 10 | 8152248   | 5       | intron[NM_002051.2]                                                   |
| 129 | rs12448257 | A/G | NLRC3    | 16 | 3539656   | 1f      | intron[NM_178844.2]                                                   |
| 130 | rs12469506 | C/T | IL1RL1   | 2  | 102332303 | 6       | intron[NM_016232.4]                                                   |
| 131 | rs1254598  | A/G | PTGER2   | 14 | 51850945  | 4       | utr-5[NM_000956.2]                                                    |
| 132 | rs12563017 | C/T | JAK1     | 1  | 65154449  | 4       | intron[NM_002227.2]                                                   |
| 133 | rs12602891 | C/T | EPX      | 17 | 53625120  | 4       | utr-5[NM_000502.2]                                                    |
| 134 | rs12603332 | C/T | ORMDL3   | 17 | 35336333  | 1f      | intron[NM_139280.1]                                                   |
| 135 | rs12619285 | A/G | CMA1     | 2  | 213532290 | 4       | -                                                                     |
| 136 | rs12652757 | A/C | CMA1     | 5  | 148194422 | No Data | -                                                                     |
| 137 | rs12693993 | A/G | CD28     | 2  | 204303842 | No Data | intron[NM_006139.1]                                                   |
| 138 | rs1269486  | A/G | GATA3    | 10 | 8136205   | 4       | near-gene-5[NM_002051.2]                                              |
| 139 | rs12698509 | C/T | VKORC1L1 | 7  | 65056311  | 6       | intron[NM_173517.3]                                                   |
| 140 | rs12709426 | A/G | ACE      | 17 | 58915488  | 5       | near-gene-5[NM_152830.1];missense[NM_000789.2]                        |
| 141 | rs12721583 | A/T | STAT3    | 17 | 37743284  | 2a      | intron[NM_213662.1]; intron[NM_139276.2]                              |
| 142 | rs12730021 | A/G | JAK1     | 1  | 65189597  | 4       | intron[NM_002227.2]                                                   |
| 143 | rs12743599 | C/T | JAK1     | 1  | 65140630  | No Data | intron[NM_002227.2]                                                   |
| 144 | rs12936231 | C/G | ZBPB2    | 17 | 35282646  | 1f      | intron[NM_199321.2]                                                   |
| 145 | rs12948058 | A/G | CCL11    | 17 | 29634980  | 6       | near-gene-5[NM_002986.2]                                              |
| 146 | rs1295687  | C/G | IL13     | 5  | 132022361 | 5       | intron[NM_002188.2]                                                   |
| 147 | rs12980031 | G/T | FCER2    | 19 | 7670436   | 2b      | intron[NM_002002.3]                                                   |
| 148 | rs12982518 | C/G | FCER2    | 19 | 7664316   | 5       | intron[NM_002002.3]                                                   |
| 149 | rs12984870 | A/G | FCER2    | 19 | 7670157   | 4       | intron[NM_002002.3]                                                   |
| 150 | rs13013349 | C/T | CMA1     | 2  | 113316797 | 6       | -                                                                     |
| 151 | rs13032029 | C/T | CMA1     | 2  | 113316886 | 6       | -                                                                     |
| 152 | rs1304037  | A/G | IL1A     | 2  | 113248707 | 5       | utr-3[NM_000575.3]                                                    |
| 153 | rs13071247 | A/C | CD80     | 3  | 120749483 | 6       | intron[NM_005191.3]                                                   |
| 154 | rs13117745 | C/T | NFKB1    | 4  | 103697738 | No Data | intron[NM_003998.2]                                                   |
| 155 | rs1319313  | A/G | NAMPT    | 7  | 105709759 | 5       | intron[NM_005746.2]                                                   |
| 156 | rs1319501  | C/T | NAMPT    | 7  | 105712989 | 2c      | near-gene-5[NM_005746.2]                                              |
| 157 | rs1321694  | A/T | CLCA1    | 1  | 86720563  | 1f      | reference[NM_001285.3]                                                |
| 158 | rs13238709 | C/T | IL4R     | 7  | 100570456 | 4       | -                                                                     |
| 159 | rs1327493  | C/G | JAK2     | 9  | 4983082   | 5       | intron[NM_004972.2]                                                   |
| 160 | rs1330363  | A/G | TNC      | 9  | 116853811 | No Data | intron[NM_002160.2]                                                   |
| 161 | rs13340504 | C/T | CCL24    | 7  | 75277632  | No Data | near-gene-3[NM_002991.2]                                              |
| 162 | rs13380741 | A/G | NOD2     | 16 | 49300439  | 5       | intron[NM_022162.1]                                                   |
| 163 | rs13421193 | A/G | DPP10    | 2  | 116265145 | No Data | missense[NM_001004360.2];missense[NM_020868.2];reference[NM_020868.2] |
| 164 | rs13431828 | C/T | IL1RL1   | 2  | 102321085 | 3a      | utr-5[NM_003856.2]                                                    |

|     |            |     |          |    |           |         |                                                                           |
|-----|------------|-----|----------|----|-----------|---------|---------------------------------------------------------------------------|
| 165 | rs1352844  | C/T | GC       | 4  | 72866613  | 6       | intron[NM_000583.2]                                                       |
| 166 | rs1353939  | A/G | NOS1     | 12 | 116159736 | 5       | intron[NM_000620.1]                                                       |
| 167 | rs1370128  | C/T | IRAK3    | 12 | 64904905  | No Data | intron[NM_007199.1]                                                       |
| 168 | rs1383258  | A/G | HLA-DOB  | 6  | 32891383  | 5       | intron[NM_002120.3]                                                       |
| 169 | rs1388604  | A/T | NOD1     | 3  | 46251882  | 5       | -                                                                         |
| 170 | rs13900    | C/T | CCL2     | 17 | 29608024  | 6       | utr-3[NM_002982.3]                                                        |
| 171 | rs1399180  | C/T | GATA3    | 10 | 8138725   | 5       | intron[NM_002051.2]                                                       |
| 172 | rs1417938  | A/T | CRP      | 1  | 157950810 | 6       | intron[NM_000567.2]                                                       |
| 173 | rs1420101  | A/G | IL1RL1   | 2  | 102324148 | 5       | intron[NM_003856.2]                                                       |
| 174 | rs1422993  | G/T | SPINK5   | 5  | 147484013 | 6       | intron[NM_006846.2]                                                       |
| 175 | rs1431403  | C/T | HLA-DPB1 | 6  | 33155009  | 1f      | intron[NM_002121.4]                                                       |
| 176 | rs1446495  | C/T | DPP10    | 2  | 116242430 | No Data | missense[NM_001004360.2];missense[NM_020868.2];reference[NM_020868.2]     |
| 177 | rs1485332  | C/G | CD80     | 3  | 120757611 | 5       | intron[NM_005191.3]                                                       |
| 178 | rs1491709  | C/T | GC       | 4  | 72832430  | No Data | intron[NM_000583.2]                                                       |
| 179 | rs1497056  | C/T | JAK1     | 1  | 65202439  | 5       | intron[NM_002227.2]                                                       |
| 180 | rs1497057  | C/G | JAK1     | 1  | 65202562  | 5       | intron[NM_002227.2]                                                       |
| 181 | rs151719   | A/G | HLA-DMB  | 6  | 33011878  | 1f      | intron[NM_002118.3]                                                       |
| 182 | rs1536798  | A/C | JAK2     | 9  | 5046931   | 5       | intron[NM_004972.2]                                                       |
| 183 | rs1538584  | A/G | TJP2     | 9  | 71011963  | No Data | intron[NM_201629.1]                                                       |
| 184 | rs1544325  | A/G | COMT     | 22 | 18311668  | 4       | intron[NM_000754.2]                                                       |
| 185 | rs1544410  | A/G | VDR      | 12 | 46526102  | 5       | intron[NM_000376.2]                                                       |
| 186 | rs1553316  | C/T | HAVCR1   | 5  | 156412087 | 4       | missense[NM_012206.2]                                                     |
| 187 | rs1556560  | A/G | JAK1     | 1  | 65146174  | 6       | intron[NM_002227.2]                                                       |
| 188 | rs1558068  | A/T | NOD1     | 7  | 30469888  | 4       | intron[NM_006092.1]                                                       |
| 189 | rs1609851  | C/G | SPINK5   | 5  | 147425216 | 6       | intron[NM_006846.2]                                                       |
| 190 | rs1624395  | A/G | IRAK3    | 12 | 64904483  | 6       | intron[NM_007199.1]                                                       |
| 191 | rs1635278  | A/G | CCL16    | 17 | 31326324  | No Data | near-gene-3[NM_004590.2]                                                  |
| 192 | rs163546   | C/T | IL5RA    | 3  | 3098326   | 6       | intron[NM_175726.1]                                                       |
| 193 | rs163549   | A/C | IL5RA    | 3  | 3102730   | 4       | intron[NM_175726.1]                                                       |
| 194 | rs163550   | C/G | IL5RA    | 3  | 3101727   | 4       | intron[NM_175726.1]                                                       |
| 195 | rs163913   | C/T | HLA-DRB1 | 19 | 6673635   | 1f      | -                                                                         |
| 196 | rs16840252 | C/T | CTLA4    | 2  | 204439764 | No Data | near-gene-5[NM_005214.3]                                                  |
| 197 | rs16845759 | G/T | TNFSF10  | 3  | 173715474 | 6       | missense[NM_003810.2]                                                     |
| 198 | rs16847019 | A/G | GC       | 4  | 72857866  | 5       | intron[NM_000583.2]                                                       |
| 199 | rs16851435 | G/T | ZBTB38   | 3  | 142644875 | 6       | missense[NM_001080412.2]                                                  |
| 200 | rs16858811 | G/T | IL8RA    | 2  | 218738088 | No Data | missense[NM_000634.2]                                                     |
| 201 | rs16871026 | A/G | TAP1     | 6  | 32923466  | No Data | intron[NM_000593.5]                                                       |
| 202 | rs16896163 | C/T | PTCRA    | 6  | 42994373  | 4       | intron[NM_138296.2]                                                       |
| 203 | rs16947078 | A/G | CCL2     | 17 | 43180499  | 6       | -                                                                         |
| 204 | rs1695     | A/G | GSTP1    | 11 | 67109265  | 4       | reference[NM_000852.2]                                                    |
| 205 | rs16965388 | A/G | GSDML    | 17 | 35315665  | 6       | reference[NM_018530.2];reference[NM_001042471.1];missense[NM_001042471.1] |
| 206 | rs16971620 | A/C | CCL5     | 17 | 31226781  | 2b      | intron[NM_002985.2]                                                       |

|     |            |     |          |    |           |         |                                                                      |
|-----|------------|-----|----------|----|-----------|---------|----------------------------------------------------------------------|
| 207 | rs17026703 | A/T | IL5RA    | 3  | 3115785   | No Data | intron[NM_175726.1]                                                  |
| 208 | rs17030    | A/G | C3       | 19 | 6628989   | 4       | reference[NM_000064.2]                                               |
| 209 | rs17032705 | A/G | NFKB1    | 4  | 103652004 | 6       | intron[NM_003998.2]                                                  |
| 210 | rs17032740 | A/G | NFKB1    | 4  | 103663809 | 5       | intron[NM_003998.2]                                                  |
| 211 | rs17032779 | C/T | NFKB1    | 4  | 103685279 | 5       | intron[NM_003998.2]                                                  |
| 212 | rs17042905 | C/T | CCL2     | 2  | 113584427 | 6       | -                                                                    |
| 213 | rs17107730 | C/G | SPINK5   | 5  | 147460001 | No Data | intron[NM_006846.2]                                                  |
| 214 | rs17125377 | A/T | CCL2     | 14 | 51872254  | No Data | -                                                                    |
| 215 | rs17127063 | A/G | JAK1     | 1  | 65084930  | 4       | reference[NM_002227.2]                                               |
| 216 | rs17127114 | A/G | JAK1     | 1  | 65108419  | No Data | intron[NM_002227.2]                                                  |
| 217 | rs17127117 | C/T | JAK1     | 1  | 65111363  | No Data | intron[NM_002227.2]                                                  |
| 218 | rs17127175 | C/T | JAK1     | 1  | 65187448  | 2b      | intron[NM_002227.2]                                                  |
| 219 | rs17159836 | C/T | FCER2    | 19 | 7663908   | 5       | intron[NM_002002.3]                                                  |
| 220 | rs17159840 | C/T | FCER2    | 19 | 7664194   | 1f      | intron[NM_002002.3]                                                  |
| 221 | rs17191234 | A/C | CCL5     | 6  | 32672659  | 6       | -                                                                    |
| 222 | rs17281995 | C/G | CD86     | 3  | 123322331 | No Data | utr-3[NM_006889.3]                                                   |
| 223 | rs17425819 | C/T | JAK2     | 9  | 5104773   | No Data | intron[NM_004972.2]                                                  |
| 224 | rs17533594 | A/G | CD28     | 2  | 204289440 | 6       | intron[NM_006139.1]                                                  |
| 225 | rs17561    | G/T | IL1A     | 2  | 113253694 | 3a      | reference[NM_000575.3]                                               |
| 226 | rs17564816 | A/G | TNFSF13B | 13 | 107725504 | No Data | intron[NM_006573.3]                                                  |
| 227 | rs17576    | A/G | MMP9     | 20 | 44073632  | 5       | reference[NM_004994.2]                                               |
| 228 | rs17659401 | A/G | IL5RA    | 3  | 3087865   | No Data | intron[NM_175726.1]                                                  |
| 229 | rs17778257 | A/T | ADRB2    | 5  | 148184770 | 6       | near-gene-5[NM_000024.4]                                             |
| 230 | rs17852635 | A/G | IL12RB1  | 19 | 18047575  | No Data | coding-synonymous[NM_005535.1]                                       |
| 231 | rs17857295 | C/G | VISA     | 20 | 3786441   | No Data | reference[NM_020746.2]                                               |
| 232 | rs17861084 | G/T | CYP1A1   | 15 | 72799072  | No Data | utr-3[NM_000499.2]                                                   |
| 233 | rs17884458 | C/T | IL5RA    | 3  | 3122196   | 5       | intron[NM_175728.1]                                                  |
| 234 | rs1799929  | C/T | NAT2     | 8  | 18302274  | No Data | reference[NM_000015.2]                                               |
| 235 | rs1799964  | C/T | LTA      | 6  | 31650287  | 4       | near-gene-3[NM_000595.2]                                             |
| 236 | rs1800454  | A/G | TAP2     | 6  | 32908390  | 6       | missense[NM_018833.2]; missense[NM_000544.3]; reference[NM_000544.3] |
| 237 | rs1800471  | C/G | TGFB1    | 19 | 46550716  | 4       | near-gene-3[NM_030578.2]; reference[NM_000660.3]                     |
| 238 | rs1800587  | C/T | IL1A     | 2  | 113259431 | 5       | utr-5[NM_000575.3]                                                   |
| 239 | rs1800621  | A/G | TNFRSF1B | 1  | 12191158  | 4       | utr-3[NM_001066.2]                                                   |
| 240 | rs1800630  | A/C | TNF      | 6  | 31650455  | 2b      | near-gene-5[NM_000594.2]                                             |
| 241 | rs1800779  | A/G | NOS3     | 7  | 150320876 | 4       | intron[NM_000603.3]                                                  |
| 242 | rs1800875  | A/G | CCL3     | 14 | 24049178  | 6       | -                                                                    |
| 243 | rs1800896  | A/G | DLGAP3   | 1  | 205013520 | 6       | -                                                                    |
| 244 | rs1800925  | C/T | IL13     | 5  | 132020708 | 2b      | near-gene-5[NM_002188.2]                                             |
| 245 | rs1801275  | A/G | IL4R     | 16 | 27281901  | No Data | reference[NM_000418.2]                                               |
| 246 | rs1801279  | A/G | NAT2     | 8  | 18301984  | 5       | missense[NM_000015.2]                                                |
| 247 | rs1801280  | C/T | NAT2     | 8  | 18302134  | 5       | missense[NM_000015.2]                                                |

|     |           |         |                  |    |           |         |                                                                          |
|-----|-----------|---------|------------------|----|-----------|---------|--------------------------------------------------------------------------|
| 248 | rs1805010 | A/C/G/T | IL4R             | 16 | 27263704  | 5       | reference[NM_001008699.1]                                                |
| 249 | rs1805016 | G/T     | IL4R             | 16 | 27282428  | 4       | missense[NM_000418.2]                                                    |
| 250 | rs1805017 | A/G     | PLA2G7           | 6  | 46792181  | No Data | missense[NM_005084.2]                                                    |
| 251 | rs1821777 | C/T     | IRAK3            | 12 | 64892495  | 6       | intron[NM_007199.1]                                                      |
| 252 | rs1823035 | C/T     | CYFIP2           | 5  | 156680247 | 6       | missense[NM_014376.2]                                                    |
| 253 | rs1858480 | A/G     | LOC100128        | 1  | 150568359 | 5       | intron[XM_001718271.1]                                                   |
| 254 | rs1860189 | C/T     | ZBPB2            | 17 | 29602471  | 5       | -                                                                        |
| 255 | rs1861494 | C/T     | IFNG             | 12 | 66837676  | 4       | intron[NM_000619.2]                                                      |
| 256 | rs1861757 | A/G     | NOD2             | 16 | 49310316  | 2b      | intron[NM_022162.1]                                                      |
| 257 | rs1861758 | C/T     | NOD2             | 16 | 49309288  | 1f      | intron[NM_022162.1]                                                      |
| 258 | rs1862442 | A/G     | SPINK5           | 5  | 147469463 | 6       | intron[NM_006846.2]                                                      |
| 259 | rs1878672 | C/G     | IL10             | 1  | 205010336 | 5       | intron[NM_000572.2]                                                      |
| 260 | rs1879877 | A/C     | CD28             | 2  | 204278245 | 5       | near-gene-5[NM_006139.1]                                                 |
| 261 | rs1881457 | A/C     | IL13             | 5  | 132020308 | 3a      | near-gene-5[NM_002188.2]                                                 |
| 262 | rs1882200 | C/T     | IRAK3            | 12 | 64883968  | 4       | intron[NM_007199.1]                                                      |
| 263 | rs1889570 | A/G     | ORMDL3           | 6  | 52218693  | No Data | -                                                                        |
| 264 | rs1894406 | A/G     | HLA-DOB          | 6  | 32895034  | 6       | -                                                                        |
| 265 | rs1894411 | A/G     | TAP2             | 6  | 32900951  | 6       | intron[NM_018833.2]                                                      |
| 266 | rs1921622 | A/G     | IL1RL1           | 2  | 102332499 | 6       | intron[NM_016232.4]                                                      |
| 267 | rs1927912 | A/G     | TLR4             | 9  | 119509247 | 4       | intron[NM_138554.2]                                                      |
| 268 | rs1933064 | A/G     | LOC100128<br>468 | 1  | 150568200 | 5       | intron[XM_001718271.1]                                                   |
| 269 | rs1940475 | C/T     | MMP8             | 11 | 102098458 | No Data | reference[NM_002424.1]                                                   |
| 270 | rs1946518 | G/T     | ORMDL3           | 11 | 111540668 | 5       | Promoter                                                                 |
| 271 | rs194675  | A/T     | HLA-DMB          | 6  | 33013724  | 6       | intron[NM_002118.3]                                                      |
| 272 | rs1956918 | C/T     | STAT3            | 14 | 24050151  | 6       | Promoter                                                                 |
| 273 | rs1956922 | A/G     | LOC100133        | 14 | 24048014  | 6       | near-gene-3[XM_001716996.1]                                              |
| 274 | rs1978331 | C/T     | LTA4H            | 12 | 94933332  | No Data | intron[NM_000895.1]                                                      |
| 275 | rs1989969 | A/C/T   | VDR              | 12 | 46564277  | No Data | intron[NM_001017535.1]                                                   |
| 276 | rs2001750 | A/G     | CD86             | 3  | 123309207 | No Data | intron[NM_006889.3]                                                      |
| 277 | rs2008188 | C/G     | GUSB             | 7  | 65066448  | No Data | intron[NM_000181.2]                                                      |
| 278 | rs2031904 | C/T     | JAK2             | 9  | 5077087   | No Data | intron[NM_004972.2]                                                      |
| 279 | rs2037955 | G/T     | NOD1             | 7  | 30478474  | 5       | intron[NM_006092.1]                                                      |
| 280 | rs2053724 | C/G     | DPP10            | 2  | 116227287 | No Data | missense[NM_020868.2];missense[NM_001004360.2];reference[NM_001004360.2] |
| 281 | rs20541   | C/T     | IL13             | 5  | 132023863 | No Data | reference[NM_002188.2]                                                   |
| 282 | rs20544   | C/T     | LOC100128        | 20 | 44078417  | 6       | intron[XM_001722009.1]                                                   |
| 283 | rs2056576 | C/T     | MMP9             | 7  | 22727727  | No Data | Promoter                                                                 |
| 284 | rs2057768 | A/G     | CD40             | 16 | 27229596  | 5       | Promoter                                                                 |
| 285 | rs2063979 | A/G     | CCL16            | 17 | 31327679  | 6       | utr-3[NM_004590.2]                                                       |
| 286 | rs2067085 | C/G     | NOD2             | 16 | 49291360  | 4       | reference[NM_022162.1]                                                   |
| 287 | rs2069714 | A/C     | IFNG             | 12 | 66837311  | No Data | intron[NM_000619.2]                                                      |
| 288 | rs2069718 | C/T     | IFNG             | 12 | 66836429  | No Data | intron[NM_000619.2]                                                      |

|     |           |     |                 |    |           |         |                                                                    |
|-----|-----------|-----|-----------------|----|-----------|---------|--------------------------------------------------------------------|
| 289 | rs2069743 | A/G | IL13            | 5  | 132021174 | 6       | near-gene-5[NM_002188.2]                                           |
| 290 | rs2069744 | C/T | IL13            | 5  | 132022568 | 5       | intron[NM_002188.2]                                                |
| 291 | rs2069763 | G/T | IL2             | 4  | 123596932 | 5       | reference[NM_000586.3]                                             |
| 292 | rs2069776 | C/T | IL2             | 4  | 123591426 | 5       | near-gene-3[NM_000586.3]                                           |
| 293 | rs2069838 | C/T | IL6             | 7  | 22735004  | No Data | intron[NM_000600.2]                                                |
| 294 | rs2069849 | C/T | IL6             | 7  | 22737681  | 5       | reference[NM_000600.2]                                             |
| 295 | rs2070120 | C/T | HLA-DOB         | 6  | 32888892  | 6       | utr-3[NM_002120.3]                                                 |
| 296 | rs2070121 | C/T | HLA-DOB         | 6  | 32889532  | No Data | reference[NM_002120.3]                                             |
| 297 | rs2070874 | C/T | IL4             | 5  | 132037609 | 2b      | utr-5[NM_172348.1]                                                 |
| 298 | rs2070901 | G/T | FCER1G          | 1  | 159451682 | 4       | near-gene-5[NM_004106.1]                                           |
| 299 | rs2070902 | C/T | FCER1G          | 1  | 159454289 | 6       | intron[NM_004106.1]                                                |
| 300 | rs2071351 | A/G | HLA-DPB1        | 6  | 33151908  | 4       | intron[NM_002121.4]                                                |
| 301 | rs2071354 | C/T | HLA-DPB1        | 6  | 33152366  | 5       | intron[NM_002121.4]                                                |
| 302 | rs2071473 | A/G | HLA-DOB         | 6  | 32890583  | 6       | intron[NM_002120.3]                                                |
| 303 | rs2071475 | C/T | HLA-DOB         | 6  | 32890365  | 1f      | intron[NM_002120.3]                                                |
| 304 | rs2071481 | A/G | TAP1            | 6  | 32927843  | 5       | intron[NM_000593.5]                                                |
| 305 | rs2071484 | A/G | ACP5            | 19 | 11549460  | 1f      | utr-5[NM_001611.3]                                                 |
| 306 | rs2071541 | C/T | PSMB8           | 6  | 32920836  | 4       | near-gene-5[NM_004159.4]                                           |
| 307 | rs2071543 | A/C | PSMB8 ;<br>TAP1 | 6  | 32919607  | 4       | missense[NM_148919.3];intron[NM_004159.4];near-gene-3[NM_000593.5] |
| 308 | rs2071554 | A/G | HLA-DOB         | 6  | 32892654  | 4       | missense[NM_002120.3]                                              |
| 309 | rs2071556 | A/C | HLA-DMB         | 6  | 33012579  | 1f      | intron[NM_002118.3]                                                |
| 310 | rs2072496 | A/G | JAK3            | 19 | 17807054  | 5       | intron[NM_000215.2]                                                |
| 311 | rs2072915 | A/T | RXR8            | 6  | 33270060  | 5       | utr-3[NM_021976.3]                                                 |
| 312 | rs2073342 | C/G | RNASE3          | 14 | 20430056  | 6       | reference[NM_002935.2]                                             |
| 313 | rs2074570 | A/G | IL4R            | 16 | 27282658  | 5       | utr-3[NM_000418.2]                                                 |
| 314 | rs2075632 | C/T | CLCA1           | 1  | 86727179  | 6       | intron[NM_001285.3]                                                |
| 315 | rs2075818 | C/G | NOD1            | 7  | 30462907  | No Data | reference[NM_006092.1]                                             |
| 316 | rs2075820 | A/G | NOD1            | 7  | 30458762  | 5       | missense[NM_006092.1]                                              |
| 317 | rs2075821 | A/G | NOD1            | 7  | 30457836  | 5       | coding-synonymous[NM_006092.1]                                     |
| 318 | rs2076752 | A/G | NOD2            | 16 | 49288597  | 5       | utr-5[NM_022162.1]                                                 |
| 319 | rs2104772 | A/T | TNC             | 9  | 116848606 | 5       | reference[NM_002160.2]                                             |
| 320 | rs2107301 | C/T | VDR             | 12 | 46541837  | 5       | intron[NM_000376.2]                                                |
| 321 | rs2107538 | C/T | CCL5            | 17 | 31231893  | 4       | near-gene-5[NM_002985.2]                                           |
| 322 | rs2110586 | C/T | JAK3            | 19 | 17818309  | 5       | intron[NM_000215.2]                                                |
| 323 | rs2111235 | C/T | NOD2            | 16 | 49291470  | 2a      | intron[NM_022162.1]                                                |
| 324 | rs2115819 | C/T | ALOX5           | 10 | 45221095  | No Data | intron[NM_000698.2]                                                |
| 325 | rs2145412 | C/T | CLCA1           | 1  | 86711718  | No Data | reference[NM_001285.3]                                             |
| 326 | rs2169650 | C/T | TBX21           | 11 | 67120493  | 6       | Promoter                                                           |
| 327 | rs2184658 | C/G | HLX             | 1  | 219119080 | 4       | near-gene-5[NM_021958.2]                                           |
| 328 | rs222014  | A/G | GC              | 4  | 72851795  | No Data | intron[NM_000583.2]                                                |
| 329 | rs222017  | A/T | GC              | 4  | 72854376  | 6       | intron[NM_000583.2]                                                |

|     |            |     |          |    |           |         |                                                                      |
|-----|------------|-----|----------|----|-----------|---------|----------------------------------------------------------------------|
| 330 | rs222040   | C/T | GC       | 4  | 72835796  | No Data | intron[NM_000583.2]                                                  |
| 331 | rs2227631  | A/G | SERPINE1 | 7  | 100556258 | 1b      | near-gene-5[NM_000602.2]                                             |
| 332 | rs2227684  | A/G | SERPINE1 | 7  | 100563651 | 1f      | intron[NM_000602.2]                                                  |
| 333 | rs2228043  | C/G | IL6ST    | 5  | 55287688  | No Data | utr-3[NM_175767.1]; missense[NM_002184.2]                            |
| 334 | rs2228046  | C/T | IL6ST    | 5  | 55286484  | 6       | missense[NM_002184.2]; utr-3[NM_175767.1]                            |
| 335 | rs2228138  | C/T | FCER2    | 19 | 7661056   | 5       | reference[NM_002002.3]                                               |
| 336 | rs2228396  | A/G | TAP2     | 6  | 32905787  | No Data | missense[NM_018833.2]; missense[NM_000544.3]; reference[NM_000544.3] |
| 337 | rs2228397  | G/T | TAP2     | 6  | 32908202  | 6       | coding-synonymous[NM_000544.3]                                       |
| 338 | rs2229094  | C/T | LTA      | 6  | 31648535  | 4       | missense[NM_000595.2]                                                |
| 339 | rs12136904 | C/T | FCER1A   | 1  | 157532516 | 6       | intron[NM_002001.2]                                                  |
| 340 | rs2230587  | C/T | JAK1     | 1  | 65083850  | 6       | reference[NM_002227.2]                                               |
| 341 | rs2234671  | C/G | IL8RA    | 2  | 218737353 | No Data | missense[NM_000634.2]                                                |
| 342 | rs2235834  | C/G | PTCRA    | 6  | 42999183  | 5       | intron[NM_138296.2]                                                  |
| 343 | rs2239347  | G/T | IL4R     | 16 | 27266522  | No Data | intron[NM_001008699.1]                                               |
| 344 | rs2239704  | G/T | LTA      | 6  | 31648120  | 1f      | utr-5[NM_000595.2]                                                   |
| 345 | rs2240478  | C/T | CCL26    | 7  | 75239354  | 5       | intron[NM_006072.4]                                                  |
| 346 | rs2243248  | G/T | IL4      | 5  | 132036543 | No Data | near-gene-5[NM_000589.2]                                             |
| 347 | rs2243253  | C/T | IL4      | 5  | 132038660 | 4       | intron[NM_172348.1]                                                  |
| 348 | rs2243261  | G/T | IL4      | 5  | 132040705 | 4       | intron[NM_172348.1]                                                  |
| 349 | rs2243263  | C/G | IL4      | 5  | 132041198 | 2b      | intron[NM_172348.1]                                                  |
| 350 | rs2243274  | A/G | IL4      | 5  | 132042731 | 6       | intron[NM_172348.1]                                                  |
| 351 | rs2243279  | A/G | IL4      | 5  | 132044126 | 5       | intron[NM_172348.1]                                                  |
| 352 | rs2243283  | C/G | IL4      | 5  | 132044492 | 5       | intron[NM_172348.1]                                                  |
| 353 | rs2244719  | C/T | CYP24A1  | 20 | 52216265  | 5       | intron[NM_000782.3]                                                  |
| 354 | rs2247119  | C/T | PHF11    | 13 | 48985143  | 6       | intron[NM_001040443.1]                                               |
| 355 | rs2250889  | C/G | MMP9     | 20 | 44075813  | 4       | missense[NM_004994.2];near-gene-3[XM_001722009.1]                    |
| 356 | rs2256023  | C/T | NOD1     | 7  | 30481516  | No Data | intron[NM_006092.1]                                                  |
| 357 | rs2270418  | G/T | TNFSF10  | 3  | 173723693 | 4       | intron[NM_003810.2]                                                  |
| 358 | rs2274276  | C/G | PHF11    | 13 | 48993954  | 6       | intron[NM_001040444.1]                                               |
| 359 | rs2274471  | C/T | JAK2     | 9  | 4975879   | 4       | intron[NM_004972.2]                                                  |
| 360 | rs2251746  | C/T | FCER1A   | 1  | 157538684 | 5       | intron[NM_002001.2]                                                  |
| 361 | rs2275254  | C/T | CHIA     | 1  | 111663497 | 5       | missense[NM_201653.2];missense[NM_021797.2];reference[NM_021797.2]   |
| 362 | rs2275806  | A/G | GATA3    | 10 | 8135346   | 4       | utr-5[NM_207423.1];near-gene-5[NM_001002295.1]                       |
| 363 | rs2280094  | A/C | ADAM33   | 20 | 3601709   | 5       | intron[NM_153202.1]                                                  |
| 364 | rs2280789  | C/T | CCL5     | 17 | 31231116  | 1f      | intron[NM_002985.2]                                                  |
| 365 | rs2282290  | A/G | CHIA     | 1  | 111664974 | 5       | near-gene-3[NM_201653.2]                                             |
| 366 | rs2284358  | A/G | NOD1     | 7  | 30455532  | 6       | intron[NM_006092.1]                                                  |
| 367 | rs2287772  | C/T | SPINK5   | 5  | 147424978 | 6       | intron[NM_006846.2]                                                  |
| 368 | rs2289277  | C/G | TSLP     | 5  | 110436966 | 2b      | intron[NM_033035.3]                                                  |
| 369 | rs2289278  | C/G | TSLP     | 5  | 110437047 | 4       | utr-5[NM_138551.2]                                                   |
| 370 | rs2290608  | A/G | IL5RA    | 3  | 3126759   | 4       | utr-5[NM_175726.1]                                                   |
| 371 | rs2290610  | A/G | IL5RA    | 3  | 3114957   | No Data | missense[NM_000564.2];reference[NM_175724.1];missense[NM_175724.1]   |

|     |           |     |          |    |           |         |                                                                           |
|-----|-----------|-----|----------|----|-----------|---------|---------------------------------------------------------------------------|
| 372 | rs2291299 | A/G | C17orf66 | 17 | 31215519  | No Data | intron[NM_152781.2]                                                       |
| 373 | rs2293044 | G/T | NOS1     | 12 | 116142374 | No Data | coding-synonymous[NM_000620.1]                                            |
| 374 | rs2293054 | A/G | NOS1     | 12 | 116186097 | No Data | coding-synonymous[NM_000620.1]                                            |
| 375 | rs2296241 | A/G | CYP24A1  | 20 | 52219626  | 4       | reference[NM_000782.3]                                                    |
| 376 | rs2297660 | A/C | LRP8     | 1  | 53504903  | 1f      | coding-synonymous[NM_017522.3]                                            |
| 377 | rs2298903 | A/T | SELP     | 1  | 167834140 | No Data | intron[NM_003005.3]                                                       |
| 378 | rs2301149 | C/G | KCNMB1   | 5  | 169738534 | 5       | missense[NM_004137.2]; intron[NM_001034838.1]                             |
| 379 | rs2302004 | C/T | CCL24    | 7  | 75280791  | 5       | intron[NM_002991.2]                                                       |
| 380 | rs2302006 | A/C | CCL24    | 7  | 75280666  | 5       | reference[NM_002991.2]                                                    |
| 381 | rs2302009 | G/T | CCL26    | 7  | 75236934  | 5       | utr-3[NM_006072.4]                                                        |
| 382 | rs2303071 | A/G | SPINK5   | 5  | 147468560 | 6       | reference[NM_006846.2]                                                    |
| 383 | rs230495  | A/G | NFKB1    | 4  | 103706336 | 3a      | intron[NM_003998.2]                                                       |
| 384 | rs230504  | C/T | NFKB1    | 4  | 103700596 | 1f      | intron[NM_003998.2]                                                       |
| 385 | rs2309428 | A/C | TJP2     | 9  | 71032843  | 5       | missense[NM_201629.1];missense[NM_004817.2];reference[NM_004817.2]        |
| 386 | rs231775  | A/G | CTLA4    | 2  | 204440959 | No Data | reference[NM_005214.3];reference[NM_001037631.1];missense[NM_001037631.1] |
| 387 | rs231777  | C/T | CTLA4    | 2  | 204441833 | No Data | intron[NM_005214.3]                                                       |
| 388 | rs231778  | A/G | CTLA4    | 2  | 204442066 | No Data | intron[NM_001037631.1]                                                    |
| 389 | rs231779  | C/T | CTLA4    | 2  | 204442732 | 5       | intron[NM_005214.3]                                                       |
| 390 | rs2332096 | G/T | CD86     | 3  | 123303833 | 3a      | intron[NM_006889.3]                                                       |
| 391 | rs2344690 | A/G | KCNS3    | 2  | 17963640  | 2b      | intron[NM_002252.3]                                                       |
| 392 | rs23544   | A/G | HLA-DMB  | 6  | 33011615  | 5       | intron[NM_002118.3]                                                       |
| 393 | rs2364572 | A/G | CHI3L1   | 1  | 201413209 | 4       | near-gene-3[NM_001276.2]                                                  |
| 394 | rs2395269 | G/T | TAP1     | 6  | 32925752  | 5       | intron[NM_000593.5]                                                       |
| 395 | rs241423  | C/T | TAP1     | 6  | 32925988  | 5       | intron[NM_000593.5]                                                       |
| 396 | rs241424  | C/T | TAP2     | 6  | 32912912  | 1f      | intron[NM_018833.2]                                                       |
| 397 | rs241426  | A/T | TAP2     | 6  | 32912531  | No Data | intron[NM_018833.2]                                                       |
| 398 | rs241428  | A/C | TAP2     | 6  | 32912048  | 5       | intron[NM_018833.2]                                                       |
| 399 | rs241429  | C/T | TAP2     | 6  | 32911818  | 6       | intron[NM_018833.2]                                                       |
| 400 | rs241436  | C/T | TAP2     | 6  | 32905854  | 6       | intron[NM_018833.2]                                                       |
| 401 | rs241439  | A/C | TAP2     | 6  | 32905515  | 4       | intron[NM_018833.2]                                                       |
| 402 | rs241448  | C/T | TAP2     | 6  | 32904663  | 1f      | intron[NM_018833.2]; reference[NM_000544.3]                               |
| 403 | rs241453  | C/T | TAP2     | 6  | 32904204  | 6       | intron[NM_018833.2]                                                       |
| 404 | rs2416257 | A/G | WDR36    | 5  | 110463389 | No Data | intron[NM_139281.2]                                                       |
| 405 | rs25680   | A/G | CD27     | 12 | 6424889   | 4       | missense[NM_001242.4]                                                     |
| 406 | rs2569190 | A/G | CD14     | 5  | 139993100 | 1b      | utr-5[NM_000591.2]                                                        |
| 407 | rs25881   | C/T | CSF2     | 5  | 131439037 | 5       | intron[NM_000758.2]                                                       |
| 408 | rs25882   | C/T | CSF2     | 5  | 131439359 | 5       | missense[NM_000758.2]                                                     |
| 409 | rs25884   | A/G | CSF2     | 5  | 131440137 | 3a      | near-gene-3[NM_000758.2]                                                  |
| 410 | rs260547  | C/G | HLA-DMB  | 6  | 33015256  | 6       | intron[NM_002118.3]                                                       |
| 411 | rs2621321 | C/T | TAP2     | 6  | 32897458  | 6       | near-gene-3[NM_018833.2]                                                  |
| 412 | rs2621332 | C/T | HLA-DOB  | 6  | 32888295  | No Data | near-gene-3[NM_002120.3]                                                  |
| 413 | rs2621366 | G/T | HLA-DOB  | 6  | 32876958  | 6       | -                                                                         |

|     |            |     |          |    |           |         |                                                                    |
|-----|------------|-----|----------|----|-----------|---------|--------------------------------------------------------------------|
| 414 | rs2664593  | C/G | ALOX15   | 17 | 4491881   | 5       | near-gene-5[NM_001140.3]                                           |
| 415 | rs2670289  | A/C | CD80     | 3  | 120757276 | 5       | intron[NM_005191.3]                                                |
| 416 | rs2681417  | A/G | CD86     | 3  | 123307887 | No Data | missense[NM_006889.3];missense[NM_175862.3];reference[NM_175862.3] |
| 417 | rs2681420  | A/G | CD86     | 3  | 123316747 | 6       | intron[NM_006889.3]                                                |
| 418 | rs2681426  | C/T | CD86     | 3  | 123283920 | 6       | intron[NM_006889.3]                                                |
| 419 | rs2702945  | A/G | DEFB1    | 8  | 6722097   | No Data | intron[NM_005218.3]                                                |
| 420 | rs2709799  | C/G | NOD1     | 7  | 30481428  | 1f      | intron[NM_006092.1]                                                |
| 421 | rs2709800  | G/T | NOD1     | 7  | 30479296  | 5       | intron[NM_006092.1]                                                |
| 422 | rs272008   | A/G | DPP10    | 2  | 116318101 | No Data | utr-3[NM_020868.2]                                                 |
| 423 | rs2734705  | A/G | CLCA1    | 1  | 86724912  | No Data | reference[NM_001285.3]                                             |
| 424 | rs2736726  | A/G | NOD1     | 7  | 30485555  | 4       | -                                                                  |
| 425 | rs2738047  | A/G | DEFB1    | 8  | 6715708   | No Data | missense[NM_005218.3]                                              |
| 426 | rs2738755  | C/T | HLX      | 1  | 219124269 | 5       | reference[NM_021958.2]                                             |
| 427 | rs2741136  | A/G | CCR3     | 8  | 6724606   | No Data | Promoter                                                           |
| 428 | rs2744537  | G/T | RXR8     | 6  | 33270193  | 1f      | utr-3[NM_021976.3]                                                 |
| 429 | rs2749935  | A/T | IL17F    | 6  | 131931574 | No Data | Promoter                                                           |
| 430 | rs2753356  | G/T | CLCA1    | 1  | 86736663  | 5       | intron[NM_001285.3]                                                |
| 431 | rs2762934  | A/G | CYP24A1  | 20 | 52204668  | 4       | utr-3[NM_000782.3]                                                 |
| 432 | rs2770146  | A/G | TLR4     | 9  | 119513159 | No Data | intron[NM_138554.2]                                                |
| 433 | rs2779248  | C/T | NOS2A    | 17 | 23151959  | 4       | near-gene-5[NM_000625.3]                                           |
| 434 | rs2780890  | A/G | JAK1     | 1  | 65074078  | 5       | intron[NM_002227.2]                                                |
| 435 | rs2780894  | C/T | JAK1     | 1  | 65081964  | No Data | intron[NM_002227.2]                                                |
| 436 | rs2781659  | A/G | IL17F    | 6  | 131933513 | No Data | Promoter                                                           |
| 437 | rs2781665  | A/T | MED23    | 6  | 131934940 | 5       | near-gene-3[NM_015979.2]                                           |
| 438 | rs2787094  | C/G | ADAM33   | 20 | 3597161   | 5       | utr-3[NM_153202.1]                                                 |
| 439 | rs2791494  | A/G | CLCA1    | 1  | 86731761  | 5       | missense[NM_001285.3]                                              |
| 440 | rs28408445 | C/G | SPINK5   | 5  | 147483711 | 6       | reference[NM_006846.2]                                             |
| 441 | rs2853563  | A/G | VDR      | 12 | 46522005  | 6       | utr-3[NM_000376.2]                                                 |
| 442 | rs2853564  | C/T | VDR      | 12 | 46564754  | 5       | intron[NM_001017535.1]                                             |
| 443 | rs2853694  | A/C | IL12B    | 5  | 158681666 | No Data | intron[NM_002187.2]                                                |
| 444 | rs2856827  | A/T | HLA-DPB1 | 6  | 33157252  | 4       | intron[NM_002121.4]                                                |
| 445 | rs2856837  | C/T | IL1A     | 2  | 113258396 | 4       | intron[NM_000575.3]                                                |
| 446 | rs2856993  | C/G | TAP2     | 6  | 32899381  | No Data | intron[NM_018833.2]                                                |
| 447 | rs2856997  | G/T | HLA-DOB  | 6  | 32889754  | 6       | intron[NM_002120.3]                                                |
| 448 | rs2857114  | C/T | HLA-DOB  | 6  | 32887974  | 6       | near-gene-3[NM_002120.3]                                           |
| 449 | rs2857656  | C/G | CCL2     | 17 | 29606120  | 4       | near-gene-5[NM_002982.3]                                           |
| 450 | rs2890618  | C/T | JAK2     | 9  | 4981840   | No Data | intron[NM_004972.2]                                                |
| 451 | rs28914820 | A/G | CCL5     | 17 | 31221048  | No Data | near-gene-3[NM_002985.2]                                           |
| 452 | rs2906766  | C/T | NOD1     | 7  | 30466100  | 2b      | utr-5[NM_006092.1]                                                 |
| 453 | rs2907748  | C/T | NOD1     | 7  | 30439548  | 5       | intron[NM_006092.1]                                                |
| 454 | rs2907749  | A/G | NOD1     | 7  | 30452266  | 2b      | intron[NM_006092.1]                                                |
| 455 | rs2970498  | C/T | NOD1     | 7  | 30444581  | No Data | intron[NM_006092.1]                                                |

|     |           |     |        |    |           |         |                                |
|-----|-----------|-----|--------|----|-----------|---------|--------------------------------|
| 456 | rs2970500 | C/G | NOD1   | 7  | 30445010  | No Data | intron[NM_006092.1]            |
| 457 | rs2970501 | C/T | NOD1   | 7  | 30462518  | No Data | intron[NM_006092.1]            |
| 458 | rs2975634 | A/G | NOD1   | 7  | 30458218  | 5       | missense[NM_006092.1]          |
| 459 | rs3020208 | C/T | NOD1   | 7  | 30458667  | 5       | reference[NM_006092.1]         |
| 460 | rs3024498 | A/G | IL10   | 1  | 205008152 | 4       | utr-3[NM_000572.2]             |
| 461 | rs3024530 | A/G | IL4R   | 16 | 27258188  | 6       | intron[NM_001008699.1]         |
| 462 | rs3024535 | C/T | IL4R   | 16 | 27259622  | 5       | intron[NM_001008699.1]         |
| 463 | rs3024543 | A/G | IL4R   | 16 | 27260731  | 5       | intron[NM_001008699.1]         |
| 464 | rs3024544 | C/T | IL4R   | 16 | 27260858  | 5       | intron[NM_001008699.1]         |
| 465 | rs3024547 | C/T | IL4R   | 16 | 27261862  | No Data | intron[NM_001008699.1]         |
| 466 | rs3024548 | C/G | IL4R   | 16 | 27262032  | No Data | intron[NM_001008699.1]         |
| 467 | rs3024560 | G/T | IL4R   | 16 | 27264168  | 6       | intron[NM_001008699.1]         |
| 468 | rs3024563 | C/T | IL4R   | 16 | 27264242  | 6       | intron[NM_001008699.1]         |
| 469 | rs3024576 | A/G | IL4R   | 16 | 27265691  | 5       | intron[NM_001008699.1]         |
| 470 | rs3024582 | G/T | IL4R   | 16 | 27266695  | No Data | intron[NM_001008699.1]         |
| 471 | rs3024585 | A/G | IL4R   | 16 | 27267345  | 6       | intron[NM_001008699.1]         |
| 472 | rs3024592 | A/T | IL4R   | 16 | 27268433  | No Data | intron[NM_001008699.1]         |
| 473 | rs3024604 | C/T | IL4R   | 16 | 27270731  | 3a      | intron[NM_001008699.1]         |
| 474 | rs3024613 | C/T | IL4R   | 16 | 27271754  | No Data | intron[NM_001008699.1]         |
| 475 | rs3024614 | A/G | IL4R   | 16 | 27271846  | 6       | intron[NM_001008699.1]         |
| 476 | rs3024620 | C/G | IL4R   | 16 | 27272419  | No Data | intron[NM_001008699.1]         |
| 477 | rs3024622 | C/G | IL4R   | 16 | 27272954  | 3a      | intron[NM_001008699.1]         |
| 478 | rs3024630 | A/G | IL4R   | 16 | 27273627  | No Data | intron[NM_001008699.1]         |
| 479 | rs3024633 | A/G | IL4R   | 16 | 27274000  | No Data | utr-3[NM_001008699.1]          |
| 480 | rs3024635 | C/T | IL4R   | 16 | 27274370  | 6       | near-gene-3[NM_001008699.1]    |
| 481 | rs3024647 | A/G | IL4R   | 16 | 27275473  | No Data | intron[NM_000418.2]            |
| 482 | rs3024658 | A/G | IL4R   | 16 | 27277955  | No Data | intron[NM_000418.2]            |
| 483 | rs3024668 | A/G | IL4R   | 16 | 27279450  | No Data | intron[NM_000418.2]            |
| 484 | rs3024669 | A/C | IL4R   | 16 | 27279817  | No Data | intron[NM_000418.2]            |
| 485 | rs3024670 | G/T | IL4R   | 16 | 27279896  | No Data | intron[NM_000418.2]            |
| 486 | rs3024672 | A/G | IL4R   | 16 | 27280632  | No Data | intron[NM_000418.2]            |
| 487 | rs3024675 | A/C | IL4R   | 16 | 27280968  | No Data | intron[NM_000418.2]            |
| 488 | rs3024676 | A/C | IL4R   | 16 | 27281059  | No Data | intron[NM_000418.2]            |
| 489 | rs3024679 | C/T | IL4R   | 16 | 27282571  | No Data | coding-synonymous[NM_000418.2] |
| 490 | rs3024955 | C/G | STAT6  | 12 | 55785421  | 5       | intron[NM_003153.3]            |
| 491 | rs3024957 | C/G | STAT6  | 12 | 55784302  | 5       | intron[NM_003153.3]            |
| 492 | rs3024971 | A/C | STAT6  | 12 | 55779994  | No Data | intron[NM_003153.3]            |
| 493 | rs3024974 | C/T | STAT6  | 12 | 55779012  | 2b      | intron[NM_003153.3]            |
| 494 | rs3087243 | A/G | CTLA4  | 2  | 204447164 | 3a      | near-gene-3[NM_005214.3]       |
| 495 | rs3087271 | A/C | IL17F  | 2  | 113611671 | 6       | Promoter                       |
| 496 | rs3091332 | A/T | CCL2   | 17 | 29604933  | No Data | near-gene-5[NM_002982.3]       |
| 497 | rs3092932 | C/T | CD40LG | X  | 135565013 | No Data | intron[NM_000074.2]            |

|     |           |     |          |    |           |         |                                                                     |
|-----|-----------|-----|----------|----|-----------|---------|---------------------------------------------------------------------|
| 498 | rs3100701 | C/T | HNMT     | 2  | 138446819 | No Data | intron[NM_001024075.1]                                              |
| 499 | rs310199  | C/T | JAK1     | 1  | 65122710  | 3a      | intron[NM_002227.2]                                                 |
| 500 | rs310207  | A/G | JAK1     | 1  | 65119629  | 4       | intron[NM_002227.2]                                                 |
| 501 | rs310227  | A/G | JAK1     | 1  | 65095730  | No Data | intron[NM_002227.2]                                                 |
| 502 | rs310235  | A/G | JAK1     | 1  | 65107911  | No Data | intron[NM_002227.2]                                                 |
| 503 | rs310236  | C/G | JAK1     | 1  | 65106445  | No Data | intron[NM_002227.2]                                                 |
| 504 | rs310241  | C/T | JAK1     | 1  | 65075926  | 5       | intron[NM_002227.2]                                                 |
| 505 | rs310244  | C/T | JAK1     | 1  | 65078465  | 5       | intron[NM_002227.2]                                                 |
| 506 | rs310247  | C/T | JAK1     | 1  | 65079997  | 5       | intron[NM_002227.2]                                                 |
| 507 | rs3116486 | C/T | CD28     | 2  | 204293747 | No Data | intron[NM_006139.1]                                                 |
| 508 | rs3116494 | A/G | CD28     | 2  | 204300266 | 6       | intron[NM_006139.1]                                                 |
| 509 | rs3132291 | C/T | RXRA     | 9  | 136472739 | 5       | near-gene-3[NM_002957.3]                                            |
| 510 | rs3134996 | A/T | HLA-DQB1 | 6  | 32744844  | 6       | -                                                                   |
| 511 | rs3135021 | A/G | HLA-DPB1 | 6  | 33153536  | 6       | intron[NM_002121.4]                                                 |
| 512 | rs3135499 | A/C | NOD2     | 16 | 49323628  | 6       | utr-3[NM_022162.1]                                                  |
| 513 | rs3136551 | A/G | CD27     | 12 | 6424121   | 3a      | near-gene-5[NM_001242.4]                                            |
| 514 | rs3138060 | C/G | IL8RA    | 2  | 218739745 | 5       | intron[NM_000634.2]                                                 |
| 515 | rs3138118 | C/T | CCL20    | 2  | 228390846 | 1b      | near-gene-3[NM_004591.1]                                            |
| 516 | rs315951  | C/G | IL1RN    | 2  | 113607057 | 5       | utr-3[NM_173843.1];utr-3[NM_173841.1];utr-3[NM_173842.1]            |
| 517 | rs315952  | C/T | IL1RN    | 2  | 113606775 | No Data | coding-synonymous[NM_173843.1];coding-                              |
| 518 | rs3181100 | C/G | CD28     | 2  | 204280251 | No Data | intron[NM_006139.1]                                                 |
| 519 | rs3181113 | G/T | CD28     | 2  | 204310155 | 6       | utr-3[NM_006139.1]                                                  |
| 520 | rs3212227 | A/C | IL12B    | 5  | 158675528 | No Data | utr-3[NM_002187.2]                                                  |
| 521 | rs3212701 | A/G | JAK3     | 19 | 17818024  | 5       | intron[NM_000215.2]                                                 |
| 522 | rs3212711 | C/T | JAK3     | 19 | 17816021  | 5       | intron[NM_000215.2]                                                 |
| 523 | rs3212714 | C/T | JAK3     | 19 | 17815947  | 5       | intron[NM_000215.2]                                                 |
| 524 | rs3212723 | A/C | JAK3     | 19 | 17815215  | 5       | missense[NM_000215.2]                                               |
| 525 | rs3212750 | C/T | JAK3     | 19 | 17810204  | 5       | intron[NM_000215.2]                                                 |
| 526 | rs3212752 | A/G | JAK3     | 19 | 17809732  | 1f      | intron[NM_000215.2]                                                 |
| 527 | rs3212756 | A/C | JAK3     | 19 | 17808847  | 5       | intron[NM_000215.2]                                                 |
| 528 | rs3212760 | C/T | JAK3     | 19 | 17808546  | 5       | intron[NM_000215.2]                                                 |
| 529 | rs3212799 | A/G | JAK3     | 19 | 17798516  | 5       | utr-3[NM_000215.2]                                                  |
| 530 | rs3213091 | A/G | IL12B    | 5  | 158683818 | 5       | intron[NM_002187.2]                                                 |
| 531 | rs324010  | C/T | NAB2     | 12 | 55768519  | 1f      | near-gene-5[NM_005967.3]                                            |
| 532 | rs324013  | C/T | STAT6    | 12 | 55796928  | 6       | -                                                                   |
| 533 | rs324015  | A/G | STAT6    | 12 | 55776367  | 1f      | utr-3[NM_003153.3]                                                  |
| 534 | rs324019  | C/T | NAB2     | 12 | 55772914  | 1f      | intron[NM_005967.3]                                                 |
| 535 | rs324957  | A/G | NPSR1    | 7  | 34767897  | 3a      | intron[NM_207173.1]                                                 |
| 536 | rs324981  | A/T | NPSR1    | 7  | 34784638  | 6       | reference[NM_207173.1];reference[NM_207172.1];missense[NM_207172.1] |
| 537 | rs334782  | A/G | IL5RA    | 3  | 3123458   | 6       | intron[NM_175727.1]                                                 |
| 538 | rs334807  | G/T | IL5RA    | 3  | 3104349   | 5       | intron[NM_175726.1]                                                 |
| 539 | rs335826  | C/G | IL5RA    | 3  | 3118888   | 3a      | intron[NM_175726.1]                                                 |

|     |            |     |          |    |           |         |                                                                    |
|-----|------------|-----|----------|----|-----------|---------|--------------------------------------------------------------------|
| 540 | rs339392   | G/T | C3       | 19 | 6673022   | 1f      | -                                                                  |
| 541 | rs340808   | C/G | IL5RA    | 3  | 3088831   | No Data | intron[NM_175726.1]                                                |
| 542 | rs340813   | G/T | IL5RA    | 3  | 3099500   | 4       | intron[NM_175726.1]                                                |
| 543 | rs340833   | A/G | IL5RA    | 3  | 3086458   | 5       | utr-3[NM_175726.1]                                                 |
| 544 | rs34171309 | G/T | CCL3     | 17 | 31440176  | 5       | reference[NM_002983.2]                                             |
| 545 | rs352140   | C/T | TLR9     | 3  | 52231737  | 5       | coding-synonymous[NM_017442.2]                                     |
| 546 | rs353547   | A/G | TWF2     | 3  | 52243906  | 1f      | intron[NM_007284.3]                                                |
| 547 | rs35797487 | C/T | TJP2     | 9  | 71041824  | No Data | missense[NM_201629.1];missense[NM_004817.2];reference[NM_004817.2] |
| 548 | rs369421   | C/T | GATA3    | 10 | 8139183   | 2a      | intron[NM_002051.2]                                                |
| 549 | rs3733359  | C/T | GC       | 4  | 72868638  | 5       | utr-5[NM_000583.2]                                                 |
| 550 | rs3741240  | A/G | SCGB1A1  | 11 | 61943118  | No Data | utr-5[NM_003357.3]                                                 |
| 551 | rs3744246  | C/T | ORMDL3   | 17 | 35337876  | 4       | near-gene-5[NM_139280.1]                                           |
| 552 | rs3744483  | C/T | STAT3    | 17 | 37719964  | 4       | utr-3[NM_213662.1];utr-3[NM_139276.2]                              |
| 553 | rs3746821  | G/T | CD40     | 20 | 44188518  | 4       | intron[NM_152854.2]                                                |
| 554 | rs3747515  | C/T | KCNS3    | 2  | 17977270  | No Data | utr-3[NM_002252.3]                                                 |
| 555 | rs3747516  | C/T | KCNS3    | 2  | 17976989  | No Data | coding-synonymous[NM_002252.3]                                     |
| 556 | rs3749985  | C/G | HLA-DPB1 | 6  | 33162411  | No Data | utr-3[NM_002121.4]                                                 |
| 557 | rs3752676  | G/T | SPINK5   | 5  | 147430278 | 5       | intron[NM_006846.2]                                                |
| 558 | rs3755867  | A/G | NFKB1    | 4  | 103745712 | 5       | intron[NM_003998.2]                                                |
| 559 | rs3756690  | C/T | SPINK5   | 5  | 147487704 | No Data | intron[NM_006846.2]                                                |
| 560 | rs375947   | A/G | IL12RB1  | 19 | 18041451  | 5       | near-gene-3[NM_153701.1];reference[NM_005535.1]                    |
| 561 | rs3759635  | C/T | STAT6    | 14 | 24048275  | No Data | Promoter                                                           |
| 562 | rs3763349  | C/T | PSMB8    | 6  | 32916210  | 5       | near-gene-3[NM_148919.3]                                           |
| 563 | rs3763354  | C/T | HLA-DOB  | 6  | 32894895  | 6       | -                                                                  |
| 564 | rs3763364  | A/T | PSMB8    | 6  | 32915498  | 5       | near-gene-3[NM_148919.3]                                           |
| 565 | rs3763365  | C/T | PSMB8    | 6  | 32915431  | 5       | near-gene-3[NM_148919.3]                                           |
| 566 | rs376397   | A/G | GATA3    | 10 | 8143304   | 4       | intron[NM_002051.2]                                                |
| 567 | rs3769683  | A/G | CD28     | 2  | 204287042 | 2b      | intron[NM_006139.1]                                                |
| 568 | rs3769684  | C/T | CD28     | 2  | 204293004 | 6       | intron[NM_006139.1]                                                |
| 569 | rs3774933  | C/T | NFKB1    | 4  | 103645369 | 2a      | intron[NM_003998.2]                                                |
| 570 | rs3774938  | A/G | NFKB1    | 4  | 103657469 | 6       | intron[NM_003998.2]                                                |
| 571 | rs3775073  | A/G | TLR6     | 4  | 38506227  | 2b      | reference[NM_006068.2]                                             |
| 572 | rs3775152  | G/T | GC       | 4  | 72849506  | 6       | intron[NM_000583.2]                                                |
| 573 | rs3777138  | A/G | SPINK5   | 5  | 147475363 | 6       | intron[NM_006846.2]                                                |
| 574 | rs3777142  | A/T | SPINK5   | 5  | 147467712 | 5       | intron[NM_006846.2]                                                |
| 575 | rs3780365  | C/T | JAK2     | 9  | 5058520   | No Data | intron[NM_004972.2]                                                |
| 576 | rs3780372  | C/T | JAK2     | 9  | 5087544   | 5       | intron[NM_004972.2]                                                |
| 577 | rs3780378  | C/T | JAK2     | 9  | 5102288   | No Data | intron[NM_004972.2]                                                |
| 578 | rs3781093  | A/G | GATA3    | 10 | 8141933   | 4       | intron[NM_002051.2]                                                |
| 579 | rs3782905  | C/G | VDR      | 12 | 46552434  | No Data | intron[NM_001017535.1]                                             |
| 580 | rs3789873  | C/G | TNC      | 9  | 116875035 | 6       | intron[NM_002160.2]                                                |
| 581 | rs3792421  | C/T | IL5RA    | 3  | 3124791   | 5       | intron[NM_175726.1]                                                |

|     |           |     |          |    |           |         |                                                                      |
|-----|-----------|-----|----------|----|-----------|---------|----------------------------------------------------------------------|
| 582 | rs3792424 | C/T | IL5RA    | 3  | 3092700   | No Data | intron[NM_175726.1]                                                  |
| 583 | rs3794766 | C/T | NOS2A    | 17 | 23146048  | 1b      | intron[NM_000625.3]                                                  |
| 584 | rs3799863 | A/T | PLA2G7   | 6  | 46795750  | No Data | intron[NM_005084.2]                                                  |
| 585 | rs3801266 | A/G | NAMPT    | 7  | 105711486 | 4       | intron[NM_005746.2]                                                  |
| 586 | rs3801267 | A/T | NAMPT    | 7  | 105706158 | No Data | intron[NM_005746.2]                                                  |
| 587 | rs3802600 | A/T | GATA3    | 10 | 8148818   | 4       | intron[NM_002051.2]                                                  |
| 588 | rs3803277 | A/C | ALOX5AP  | 13 | 30216308  | 5       | intron[NM_001629.2]                                                  |
| 589 | rs3804100 | C/T | TLR2     | 4  | 154844859 | No Data | coding-synonymous[NM_003264.3];                                      |
| 590 | rs3804791 | A/G | IL5RA    | 3  | 3124568   | No Data | intron[NM_175727.1]                                                  |
| 591 | rs3804798 | A/T | IL5RA    | 3  | 3102975   | 6       | intron[NM_175726.1]                                                  |
| 592 | rs3804800 | A/G | IL5RA    | 3  | 3102519   | No Data | intron[NM_175726.1]                                                  |
| 593 | rs3804803 | A/G | IL5RA    | 3  | 3099182   | 5       | intron[NM_175726.1]                                                  |
| 594 | rs3806448 | C/T | CHIA     | 1  | 111633728 | 5       | near-gene-5[NM_201653.2]                                             |
| 595 | rs3806933 | C/T | TSLP     | 5  | 110434641 | 5       | near-gene-5[NM_033035.3]                                             |
| 596 | rs3815736 | A/G | SPINK5   | 5  | 147473984 | 6       | intron[NM_006846.2]                                                  |
| 597 | rs3818822 | A/G | CHIA     | 1  | 111658731 | No Data | missense[NM_201653.2];utr-5[NM_021797.2]                             |
| 598 | rs3819714 | A/G | TAP2     | 6  | 32912195  | 6       | intron[NM_018833.2]                                                  |
| 599 | rs3819721 | A/G | TAP2     | 6  | 32912776  | 6       | intron[NM_018833.2]                                                  |
| 600 | rs3824432 | A/G | JAK2     | 9  | 5081675   | No Data | intron[NM_004972.2]                                                  |
| 601 | rs3830058 | C/T | HLA-DQB1 | 6  | 32741988  | 5       | intron[NM_002123.3]                                                  |
| 602 | rs3846133 | A/C | IL5RA    | 3  | 3103195   | 5       | intron[NM_175726.1]                                                  |
| 603 | rs3856848 | A/G | IL5RA    | 3  | 3122676   | 6       | intron[NM_175726.1]                                                  |
| 604 | rs3859192 | C/T | GSDM1    | 17 | 35382174  | 3a      | intron[NM_178171.4]                                                  |
| 605 | rs3894194 | C/T | GSDM1    | 17 | 35375519  | 1f      | missense[NM_178171.4]                                                |
| 606 | rs3917724 | C/T | SELP     | 1  | 167848219 | No Data | reference[NM_003005.3]                                               |
| 607 | rs3917726 | A/G | SELP     | 1  | 167847914 | No Data | intron[NM_003005.3]                                                  |
| 608 | rs3917878 | C/T | STAT6    | 17 | 29602968  | No Data | Promoter                                                             |
| 609 | rs3918241 | A/T | MMP9     | 20 | 44069142  | 5       | near-gene-5[NM_004994.2]                                             |
| 610 | rs3918392 | A/G | ADAM33   | 20 | 3603219   | 5       | reference[NM_153202.1];reference[NM_025220.2] ;missense[NM_025220.2] |
| 611 | rs3924264 | A/G | NDUFS2   | 1  | 159445308 | 6       | intron[NM_004550.4]                                                  |
| 612 | rs3939286 | A/G | STAT6    | 9  | 6200099   | 6       | Promoter                                                             |
| 613 | rs4001077 | G/T | ACE      | 1  | 86702040  | 6       | Promoter                                                             |
| 614 | rs404733  | A/T | IL12RB1  | 19 | 18030997  | 5       | near-gene-3[NM_005535.1]                                             |
| 615 | rs4054760 | C/T | IL5RA    | 3  | 3126668   | 3a      | utr-5[NM_175728.1]                                                   |
| 616 | rs406103  | C/T | GATA3    | 10 | 8151627   | 4       | intron[NM_002051.2]                                                  |
| 617 | rs4072234 | A/G | GUSB     | 1  | 238139849 | No Data | Promoter                                                             |
| 618 | rs412681  | A/G | GATA3    | 10 | 8154753   | 5       | intron[NM_002051.2]                                                  |
| 619 | rs4143832 | A/C | GSTP1    | 5  | 131890876 | 4       | Promoter                                                             |
| 620 | rs4148871 | C/T | TAP2     | 6  | 32911294  | No Data | intron[NM_018833.2]                                                  |
| 621 | rs4148882 | C/T | TAP1     | 6  | 32924936  | 6       | intron[NM_000593.5]                                                  |
| 622 | rs4235232 | G/T | TLR2     | 4  | 154837534 | No Data | intron[NM_003264.3]                                                  |
| 623 | rs4239702 | C/T | CD40     | 20 | 44182658  | 5       | intron[NM_001250.4]                                                  |

|     |           |     |          |    |           |         |                                                                     |
|-----|-----------|-----|----------|----|-----------|---------|---------------------------------------------------------------------|
| 624 | rs4240711 | A/G | RXRA     | 9  | 136469127 | 5       | utr-3[NM_002957.3]                                                  |
| 625 | rs425648  | G/T | GSTP1    | 19 | 18063112  | 2b      | Downstream                                                          |
| 626 | rs4270326 | C/G | ICOS     | 2  | 204529859 | No Data | intron[NM_012092.2]                                                 |
| 627 | rs4290    | C/T | CLCA1    | 17 | 58905860  | 4       | Promoter                                                            |
| 628 | rs4291    | A/T | ACE      | 17 | 58907926  | 4       | near-gene-5[NM_000789.2]                                            |
| 629 | rs4295    | C/G | ACE      | 17 | 58910030  | 4       | intron[NM_000789.2]                                                 |
| 630 | rs4309    | C/T | ACE      | 17 | 58913655  | 4       | reference[NM_000789.2]                                              |
| 631 | rs432014  | C/T | IL1RN    | 2  | 113605050 | 6       | intron[NM_173843.1];intron[NM_000577.3];intron[NM_173842.1]         |
| 632 | rs4322988 | G/T | IL5RA    | 3  | 3095571   | No Data | intron[NM_175726.1]                                                 |
| 633 | rs4343    | A/G | ACE      | 17 | 58919763  | 2b      | coding-synonymous[NM_152830.1]                                      |
| 634 | rs4362    | C/T | ACE      | 17 | 58927493  | 5       | coding-synonymous[NM_152830.1]                                      |
| 635 | rs436857  | A/G | IL12RB1  | 19 | 18058635  | 2b      | utr-5[NM_153701.1]                                                  |
| 636 | rs4372063 | A/G | JAK2     | 9  | 4993338   | No Data | intron[NM_004972.2]                                                 |
| 637 | rs4393129 | C/T | CLCA1    | 1  | 86702501  | 6       | Promoter                                                            |
| 638 | rs444929  | C/T | GATA3    | 10 | 8150030   | No Data | intron[NM_002051.2]                                                 |
| 639 | rs4468448 | C/T | ALOX5AP  | 13 | 30228316  | No Data | intron[NM_001629.2]                                                 |
| 640 | rs4472254 | G/T | SPINK5   | 5  | 147433830 | 6       | intron[NM_006846.2]                                                 |
| 641 | rs4488202 | A/G | SCGB1A1  | 11 | 61942174  | 5       | near-gene-5[NM_003357.3]                                            |
| 642 | rs4489574 | C/T | CLCA1    | 1  | 159456337 | 1f      | Promoter                                                            |
| 643 | rs4498841 | A/C | JAK1     | 1  | 65191601  | No Data | intron[NM_002227.2]                                                 |
| 644 | rs4516432 | C/T | DPP10    | 2  | 116098367 | No Data | intron[NM_001004360.2]                                              |
| 645 | rs4529181 | C/G | SPINK5   | 5  | 147449164 | 5       | intron[NM_006846.2]                                                 |
| 646 | rs4559    | A/G | NAB2     | 12 | 55775915  | 2b      | near-gene-3[NM_005967.3]                                            |
| 647 | rs4588    | A/C | GC       | 4  | 72837187  | 5       | missense[NM_000583.2]                                               |
| 648 | rs4648006 | C/T | NFKB1    | 4  | 103680588 | No Data | intron[NM_003998.2]                                                 |
| 649 | rs4648064 | A/G | NFKB1    | 4  | 103735775 | 6       | intron[NM_003998.2]                                                 |
| 650 | rs4648090 | A/G | NFKB1    | 4  | 103746106 | 6       | intron[NM_003998.2]                                                 |
| 651 | rs4648093 | A/G | NFKB1    | 4  | 103746693 | 5       | coding-synonymous[NM_003998.2]                                      |
| 652 | rs4648130 | C/T | NFKB1    | 4  | 103755084 | 6       | intron[NM_003998.2]                                                 |
| 653 | rs4648134 | A/G | NFKB1    | 4  | 103755487 | No Data | intron[NM_003998.2]                                                 |
| 654 | rs4648141 | A/G | NFKB1    | 4  | 103755947 | 5       | intron[NM_003998.2]                                                 |
| 655 | rs4656112 | A/T | CLCA1    | 1  | 86702959  | No Data | Promoter                                                            |
| 656 | rs4664448 | A/G | GCG      | 2  | 162715666 | No Data | intron[NM_002054.2]                                                 |
| 657 | rs4674259 | A/G | IL8RB    | 2  | 218699250 | 1f      | utr-5[NM_001557.2]                                                  |
| 658 | rs4675363 | C/T | CD28     | 2  | 204298316 | No Data | intron[NM_006139.1]                                                 |
| 659 | rs4696483 | C/T | TLR2     | 4  | 154838705 | 5       | intron[NM_003264.3]                                                 |
| 660 | rs4705916 | A/C | CSF2     | 5  | 131435392 | 5       | near-gene-5[NM_000758.2]                                            |
| 661 | rs4715291 | C/T | SERPINE1 | 6  | 52221319  | No Data | Downstream                                                          |
| 662 | rs4720003 | C/T | NOD1     | 7  | 30475517  | 4       | intron[NM_006092.1]                                                 |
| 663 | rs4740    | A/G | EBI3     | 19 | 4187996   | No Data | missense[NM_005755.2]                                               |
| 664 | rs477292  | A/G | OPRM1    | 6  | 154405080 | 5       | intron[NM_001008505.1]; intron[NM_000914.2]; intron[NM_001008503.1] |

|     |           |     |           |    |           |         |                                                                                      |
|-----|-----------|-----|-----------|----|-----------|---------|--------------------------------------------------------------------------------------|
| 665 | rs4787948 | A/G | IL4R      | 16 | 27248560  | 1f      | intron[NM_001008699.1]                                                               |
| 666 | rs4790210 | A/G | SERPINE1  | 17 | 4475587   | 5       | Downstream                                                                           |
| 667 | rs4794067 | C/T | TBX21     | 17 | 43163827  | 5       | near-gene-5[NM_013351.1]                                                             |
| 668 | rs4795095 | A/G | CCL5      | 17 | 31221413  | 6       | near-gene-3[NM_002985.2]                                                             |
| 669 | rs4795402 | A/C | MMP8      | 17 | 35338911  | 1f      | Promoter                                                                             |
| 670 | rs4796123 | C/T | MMP8      | 17 | 31235573  | 6       | Promoter                                                                             |
| 671 | rs4796793 | C/G | NAMPT     | 17 | 37795736  | 1f      | Promoter                                                                             |
| 672 | rs4832524 | A/G | KCNS3     | 2  | 17977104  | No Data | reference[NM_002252.3]                                                               |
| 673 | rs4833095 | C/T | TLR1      | 4  | 38476105  | 5       | reference[NM_003263.3]                                                               |
| 674 | rs4848306 | A/G | LOC149620 | 2  | 113314578 | 6       | Downstream                                                                           |
| 675 | rs485411  | C/T | FLJ45983  | 10 | 8133191   | 4       | reference[NM_207423.1]                                                               |
| 676 | rs4857855 | C/T | TEX12     | 3  | 129743240 | No Data | Promoter                                                                             |
| 677 | rs4880158 | C/T | TRAF2     | 9  | 138924500 | 5       | intron[NM_021138.3]                                                                  |
| 678 | rs4916011 | C/T | JAK1      | 1  | 65164614  | No Data | intron[NM_002227.2]                                                                  |
| 679 | rs4933    | C/T | DAP3      | 1  | 153965742 | 4       | coding-synonymous[NM_033657.1];coding-synonymous[NM_004632.2];reference[NM_004632.2] |
| 680 | rs4950928 | C/G | CHI3L1    | 1  | 201422505 | 1f      | utr-5[NM_001276.2]                                                                   |
| 681 | rs4986832 | A/G | ALOX5     | 10 | 45188034  | 5       | near-gene-5[NM_000698.2]                                                             |
| 682 | rs502581  | A/C | MS4A2     | 11 | 59616754  | 5       | intron[NM_000139.2]                                                                  |
| 683 | rs5030710 | C/T | TLR4      | 9  | 119514542 | 5       | coding-synonymous[NM_138554.2]                                                       |
| 684 | rs5030717 | A/G | TLR4      | 9  | 119513655 | No Data | intron[NM_138554.2]                                                                  |
| 685 | rs5030729 | A/G | TLR4      | 9  | 119514160 | No Data | intron[NM_138554.2]                                                                  |
| 686 | rs512555  | A/G | MS4A2     | 11 | 59619829  | 6       | utr-3[NM_000139.2]                                                                   |
| 687 | rs521143  | G/T | GATA3     | 10 | 8135781   | 4       | near-gene-5[NM_207423.1];near-gene-5[NM_001002295.1]                                 |
| 688 | rs5244    | C/T | CMA1      | 14 | 24047434  | 4       | near-gene-5[NM_001836.2]                                                             |
| 689 | rs5245    | A/T | CMA1      | 14 | 24047341  | 4       | near-gene-5[NM_001836.2]                                                             |
| 690 | rs5248    | A/G | CMA1      | 14 | 24045654  | No Data | intron[NM_001836.2]                                                                  |
| 691 | rs525389  | A/G | CHRM3     | 1  | 237999005 | 6       | intron[NM_000740.2]                                                                  |
| 692 | rs527004  | C/T | CD80      | 3  | 120751802 | 5       | intron[NM_005191.3]                                                                  |
| 693 | rs528557  | C/G | ADAM33    | 20 | 3599742   | 4       | coding-synonymous[NM_153202.1]                                                       |
| 694 | rs528778  | C/T | GATA3     | 10 | 8152149   | 3a      | intron[NM_002051.2]                                                                  |
| 695 | rs549908  | G/T | IL18      | 11 | 111526126 | No Data | reference[NM_001562.2]                                                               |
| 696 | rs556960  | A/G | FLJ45983  | 10 | 8134152   | 4       | intron[NM_207423.1]                                                                  |
| 697 | rs569421  | C/T | GATA3     | 10 | 8148598   | 5       | intron[NM_002051.2]                                                                  |
| 698 | rs570613  | A/G | GATA3     | 10 | 8146508   | 5       | intron[NM_002051.2]                                                                  |
| 699 | rs5743270 | A/G | NOD2      | 16 | 49299563  | 5       | intron[NM_022162.1]                                                                  |
| 700 | rs5743334 | C/G | NOD1      | 7  | 30465636  | 4       | intron[NM_006092.1]                                                                  |
| 701 | rs5743356 | G/T | NOD1      | 7  | 30452524  | 5       | intron[NM_006092.1]                                                                  |
| 702 | rs5743367 | C/T | NOD1      | 7  | 30434903  | 6       | intron[NM_006092.1]                                                                  |
| 703 | rs5743369 | A/G | NOD1      | 7  | 30434709  | No Data | intron[NM_006092.1]                                                                  |
| 704 | rs5743371 | A/G | NOD1      | 7  | 30431899  | No Data | intron[NM_006092.1]                                                                  |
| 705 | rs5743808 | C/T | TLR6      | 4  | 38507131  | 5       | missense[NM_006068.2]                                                                |

|     |           |     |           |    |           |         |                             |
|-----|-----------|-----|-----------|----|-----------|---------|-----------------------------|
| 706 | rs5743810 | C/T | TLR6      | 4  | 38506745  | No Data | missense[NM_006068.2]       |
| 707 | rs5744295 | A/C | IL1B      | 1  | 86704633  | 6       | Promoter                    |
| 708 | rs5744455 | C/T | CD14      | 5  | 139993491 | 3a      | near-gene-5[NM_001040021.1] |
| 709 | rs5746065 | A/C | TNFRSF1B  | 1  | 12190051  | 5       | utr-3[NM_001066.2]          |
| 710 | rs5746068 | C/G | TNFRSF1B  | 1  | 12190142  | 5       | utr-3[NM_001066.2]          |
| 711 | rs5746847 | C/T | TXNRD2    | 22 | 18301003  | 2b      | intron[NM_006440.3]         |
| 712 | rs5993883 | G/T | COMT      | 22 | 18317638  | No Data | intron[NM_000754.2]         |
| 713 | rs6017737 | C/T | IL1B      | 20 | 44176718  | 6       | Promoter                    |
| 714 | rs6098    | A/G | IL1B      | 18 | 59715374  | 6       | reference[NM_002575.1]      |
| 715 | rs6103    | C/G | IL1B      | 18 | 59721483  | 1d      | reference[NM_002575.1]      |
| 716 | rs6104419 | A/G | IL1B      | 20 | 44067296  | 4       | Promoter                    |
| 717 | rs612020  | C/T | IL1B      | 11 | 67102017  | 1f      | Promoter                    |
| 718 | rs612242  | C/G | IL17F     | 6  | 52211119  | No Data | intron[NM_052872.3]         |
| 719 | rs612709  | A/G | ADAM33    | 20 | 3600207   | 3a      | intron[NM_153202.1]         |
| 720 | rs6131    | A/G | SELP      | 1  | 167847509 | 6       | missense[NM_003005.3]       |
| 721 | rs6131034 | C/G | CDH22     | 20 | 44257668  | 5       | intron[NM_021248.1]         |
| 722 | rs6133    | G/T | SELP      | 1  | 167831970 | 4       | reference[NM_003005.3]      |
| 723 | rs614251  | G/T | IL1RN     | 1  | 239872674 | 4       | Promoter                    |
| 724 | rs624035  | A/G | IL1RN     | 3  | 120739769 | No Data | intron[NM_005191.3]         |
| 725 | rs626364  | C/T | CD80      | 3  | 120755573 | 5       | intron[NM_005191.3]         |
| 726 | rs6413523 | G/T | SFTPD     | 10 | 81696115  | 6       | intron[NM_003019.4]         |
| 727 | rs6425925 | C/G | IL1RN     | 1  | 35146797  | 5       | Downstream                  |
| 728 | rs6476934 | G/T | JAK2      | 9  | 4983267   | 5       | intron[NM_004972.2]         |
| 729 | rs6476939 | A/T | JAK2      | 9  | 5074837   | 5       | intron[NM_004972.2]         |
| 730 | rs6498011 | A/G | IL4R      | 16 | 27239395  | No Data | intron[NM_001008699.1]      |
| 731 | rs6500328 | A/G | NOD2      | 16 | 49294157  | 5       | intron[NM_022162.1]         |
| 732 | rs6580521 | A/T | SPINK5    | 5  | 147454992 | 6       | intron[NM_006846.2]         |
| 733 | rs6587665 | C/T | LOC100128 | 1  | 150557595 | No Data | intron[XM_001718271.1]      |
| 734 | rs6590986 | C/T | MMP8      | 11 | 102104069 | 2a      | -                           |
| 735 | rs6627    | A/G | MAML1     | 5  | 179136539 | 5       | utr-3[NM_014757.3]          |
| 736 | rs6665683 | C/T | FCER1A    | 1  | 157531752 | No Data | intron[NM_002001.2]         |
| 737 | rs6666554 | A/G | SELP      | 1  | 167868733 | No Data | -                           |
| 738 | rs6672024 | C/T | FCER1A    | 1  | 157533346 | 5       | intron[NM_002001.2]         |
| 739 | rs6680548 | C/T | JAK1      | 1  | 65187031  | 5       | intron[NM_002227.2]         |
| 740 | rs6691378 | A/G | ARG1      | 1  | 201423745 | 6       | Promoter                    |
| 741 | rs6707930 | A/C | IL1F9     | 2  | 113454101 | No Data | missense[NM_019618.2]       |
| 742 | rs6735355 | A/G | DPP10     | 2  | 116264996 | 6       | intron[NM_020868.2]         |
| 743 | rs677901  | C/T | ARG1      | 6  | 52219060  | No Data | Promoter                    |
| 744 | rs6793085 | C/T | IL5RA     | 3  | 3117423   | 5       | intron[NM_175728.1]         |
| 745 | rs6807043 | C/T | CD80      | 3  | 120747877 | 6       | intron[NM_005191.3]         |
| 746 | rs6807532 | C/T | CD80      | 3  | 120757531 | 5       | intron[NM_005191.3]         |
| 747 | rs6808378 | C/T | IL5RA     | 3  | 3117943   | No Data | intron[NM_175728.1]         |

|     |           |     |          |    |           |         |                                                                     |
|-----|-----------|-----|----------|----|-----------|---------|---------------------------------------------------------------------|
| 748 | rs6809408 | A/C | IL5RA    | 3  | 3097827   | No Data | intron[NM_175726.1]                                                 |
| 749 | rs6810204 | C/T | CD80     | 3  | 120757788 | 5       | intron[NM_005191.3]                                                 |
| 750 | rs68600   | A/G | HLA-DMB  | 6  | 33011702  | 5       | intron[NM_002118.3]                                                 |
| 751 | rs6864123 | A/G | TSLP     | 5  | 110441032 | No Data | utr-3[NM_033035.3]                                                  |
| 752 | rs6864920 | A/G | SPINK5   | 5  | 147454820 | 5       | intron[NM_006846.2]                                                 |
| 753 | rs6872218 | C/T | SPINK5   | 5  | 147486183 | No Data | intron[NM_006846.2]                                                 |
| 754 | rs6872265 | G/T | SPINK5   | 5  | 147473736 | No Data | intron[NM_006846.2]                                                 |
| 755 | rs6872979 | C/G | SPINK5   | 5  | 147444035 | No Data | intron[NM_006846.2]                                                 |
| 756 | rs6878956 | C/T | SPINK5   | 5  | 147474552 | No Data | intron[NM_006846.2]                                                 |
| 757 | rs688659  | A/G | OPN3     | 1  | 239868218 | 4       | intron[NM_014322.2]                                                 |
| 758 | rs6892070 | C/T | SPINK5   | 5  | 147494433 | No Data | intron[NM_006846.2]                                                 |
| 759 | rs6892205 | A/G | SPINK5   | 5  | 147455579 | No Data | reference[NM_006846.2]                                              |
| 760 | rs689470  | C/T | PTGS2    | 1  | 184907681 | 5       | utr-3[NM_000963.1]                                                  |
| 761 | rs6896451 | A/G | SPINK5   | 5  | 147495354 | No Data | intron[NM_006846.2]                                                 |
| 762 | rs6905503 | G/T | TAP2     | 6  | 32902097  | 5       | intron[NM_018833.2]                                                 |
| 763 | rs6906021 | C/T | HLA-DQB1 | 6  | 32734289  | 1d      | near-gene-3[NM_002123.3]                                            |
| 764 | rs6912414 | A/G | HLA-DOB  | 6  | 32882443  | No Data | -                                                                   |
| 765 | rs693640  | C/T | CD80     | 3  | 120747072 | No Data | intron[NM_005191.3]                                                 |
| 766 | rs6949758 | C/G | NOD1     | 7  | 30468204  | No Data | intron[NM_006092.1]                                                 |
| 767 | rs6958905 | C/T | NPSR1    | 7  | 34856077  | No Data | intron[NM_207173.1]                                                 |
| 768 | rs6959470 | C/T | NOD1     | 7  | 30436415  | 5       | intron[NM_006092.1]                                                 |
| 769 | rs6963954 | A/G | NOD1     | 7  | 30480966  | No Data | intron[NM_006092.1]                                                 |
| 770 | rs6972158 | A/G | NPSR1    | 7  | 34855707  | 6       | intron[NM_207173.1]; missense[NM_207172.1]                          |
| 771 | rs7030260 | A/C | JAK2     | 9  | 4998070   | No Data | intron[NM_004972.2]                                                 |
| 772 | rs7031456 | G/T | JAK2     | 9  | 5069156   | No Data | intron[NM_004972.2]                                                 |
| 773 | rs7046736 | A/C | JAK2     | 9  | 5005732   | No Data | intron[NM_004972.2]                                                 |
| 774 | rs705119  | A/C | GC       | 4  | 72831900  | No Data | intron[NM_000583.2]                                                 |
| 775 | rs705124  | A/G | GC       | 4  | 72851507  | No Data | intron[NM_000583.2]                                                 |
| 776 | rs709607  | C/G | GUSB     | 7  | 65086976  | 4       | -                                                                   |
| 777 | rs7096206 | C/G | MBL2     | 10 | 54201691  | 1f      | near-gene-5[NM_000242.1]                                            |
| 778 | rs711438  | A/G | NAMPT    | 7  | 105694547 | No Data | intron[NM_005746.2]                                                 |
| 779 | rs714158  | C/T | CYFIP2 ; | 5  | 156631883 | 4       | intron[NM_001037333.1];intron[NM_001037332.2]                       |
| 780 | rs714289  | C/T | HLA-DMB  | 6  | 33013789  | 6       | intron[NM_002118.3]                                                 |
| 781 | rs7179270 | C/T | TJP1     | 15 | 27805919  |         | reference[NM_175610.2];reference[NM_003257.3];missense[NM_003257.3] |
| 782 | rs7196646 | A/G | NLRC3    | 16 | 3560288   | 6       | intron[NM_178844.2]                                                 |
| 783 | rs7216389 | C/T | GSDML    | 17 | 35323475  | 6       | intron[NM_018530.2]                                                 |
| 784 | rs7217186 | C/T | ALOX15   | 17 | 4486141   | 5       | intron[NM_001140.3]                                                 |
| 785 | rs7219923 | C/T | GSDML    | 17 | 35328044  | 6       | intron[NM_001042471.1]                                              |
| 786 | rs722323  | C/T | IL17F    | 6  | 52214819  | No Data | intron[NM_052872.3]                                                 |
| 787 | rs7224129 | A/G | ORMDL3   | 17 | 35328952  | 1f      | near-gene-3[NM_139280.1]                                            |
| 788 | rs7246264 | C/T | FCER2    | 19 | 7668978   | 5       | intron[NM_002002.3]                                                 |
| 789 | rs726168  | C/T | CHRM3    | 1  | 237860987 | 3b      | intron[NM_000740.2]                                                 |

|     |           |     |          |    |           |         |                                                                     |
|-----|-----------|-----|----------|----|-----------|---------|---------------------------------------------------------------------|
| 790 | rs7269320 | C/T | VISA     | 20 | 3794397   | 5       | reference[NM_020746.2]                                              |
| 791 | rs727162  | C/G | NPSR1    | 7  | 34840563  | 6       | reference[NM_207173.1];reference[NM_207172.1];missense[NM_207172.1] |
| 792 | rs727588  | A/C | CYFIP2   | 5  | 156631707 | 2a      | intron[NM_001037333.1];intron[NM_001037332.2]                       |
| 793 | rs736782  | C/T | NOD1     | 7  | 30470798  | 3a      | intron[NM_006092.1]                                                 |
| 794 | rs737866  | A/G | COMT     | 22 | 18310109  | 4       | intron[NM_000754.2]                                                 |
| 795 | rs7383287 | A/G | HLA-DOB  | 6  | 32891064  | 5       | coding-synonymous[NM_002120.3]                                      |
| 796 | rs7419168 | C/T | JAK1     | 1  | 65169610  | No Data | intron[NM_002227.2]                                                 |
| 797 | rs7502875 | A/C | TBX21    | 17 | 43178226  | 5       | utr-3[NM_013351.1]                                                  |
| 798 | rs7515776 | A/T | CHI3L1   | 1  | 201422326 | 1f      | intron[NM_001276.2]                                                 |
| 799 | rs7523783 | A/G | JAK1     | 1  | 65145205  | 4       | intron[NM_002227.2]                                                 |
| 800 | rs7524842 | C/T | JAK1     | 1  | 65103379  | No Data | intron[NM_002227.2]                                                 |
| 801 | rs7528403 | G/T | JAK1     | 1  | 65155380  | 5       | intron[NM_002227.2]                                                 |
| 802 | rs7539178 | A/C | JAK1     | 1  | 65155590  | 2b      | intron[NM_002227.2]                                                 |
| 803 | rs7542760 | A/G | PIGR     | 1  | 205174429 | No Data | reference[NM_002644.2]                                              |
| 804 | rs7553101 | C/T | JAK1     | 1  | 65192778  | No Data | intron[NM_002227.2]                                                 |
| 805 | rs7569719 | C/T | KCNS3    | 2  | 17975939  | No Data | coding-synonymous[NM_002252.3]                                      |
| 806 | rs757716  | C/G | CD14     | 7  | 100574122 | 1f      | Downstream                                                          |
| 807 | rs761988  | A/G | CD14     | 14 | 24050525  | 6       | Downstream                                                          |
| 808 | rs7628626 | A/C | CD80     | 3  | 120727111 | No Data | utr-3[NM_005191.3]                                                  |
| 809 | rs763780  | C/T | IL17F    | 6  | 52209698  | No Data | reference[NM_052872.3]                                              |
| 810 | rs7639988 | C/T | IL5RA    | 3  | 3108584   | No Data | intron[NM_175726.1]                                                 |
| 811 | rs7647903 | A/G | IL5RA    | 3  | 3108791   | No Data | utr-3[NM_175727.1]                                                  |
| 812 | rs7653908 | C/G | TLR10    | 4  | 38458616  | 6       | intron[NM_030956.2]                                                 |
| 813 | rs7658893 | A/G | TLR10    | 4  | 38458815  | No Data | intron[NM_030956.2]                                                 |
| 814 | rs767007  | C/G | CYFIP2   | 5  | 156629073 | 4       | intron[NM_001037333.1];intron[NM_001037332.2]                       |
| 815 | rs7674579 | G/T | TLR2     | 4  | 154834184 | No Data | intron[NM_003264.3]                                                 |
| 816 | rs769178  | A/C | LTB      | 6  | 31655493  | 2b      | near-gene-3[NM_009588.1]                                            |
| 817 | rs7711953 | C/G | SPINK5   | 5  | 147448427 | No Data | intron[NM_006846.2]                                                 |
| 818 | rs7748681 | A/C | HLA-DOB  | 6  | 32881836  | No Data | -                                                                   |
| 819 | rs7762120 | C/T | HLA-DOB  | 6  | 32893262  | 6       | near-gene-5[NM_002120.3]                                            |
| 820 | rs7781700 | C/T | NOD1     | 7  | 30464057  | No Data | intron[NM_006092.1]                                                 |
| 821 | rs778583  | C/T | ADRB2    | 5  | 139985294 | No Data | Downstream                                                          |
| 822 | rs778584  | C/T | FCER1G   | 5  | 139985396 | 1f      | Downstream                                                          |
| 823 | rs778593  | C/T | IK       | 5  | 140007400 | 4       | near-gene-5[NM_006083.3]                                            |
| 824 | rs7789066 | A/G | SELP     | 7  | 105714988 | No Data | Promoter                                                            |
| 825 | rs7793010 | C/T | NOD1     | 7  | 30436678  | 4       | intron[NM_006092.1]                                                 |
| 826 | rs7794325 | C/G | NOD1     | 7  | 30433453  | No Data | intron[NM_006092.1]                                                 |
| 827 | rs7849191 | C/T | JAK2     | 9  | 4978761   | No Data | intron[NM_004972.2]                                                 |
| 828 | rs7851969 | C/G | JAK2     | 9  | 5090291   | No Data | intron[NM_004972.2]                                                 |
| 829 | rs7852309 | A/G | JAK2     | 9  | 5000920   | 6       | intron[NM_004972.2]                                                 |
| 830 | rs7852970 | A/G | TRAF2    | 9  | 138940242 | 2b      | utr-3[NM_021138.3]                                                  |
| 831 | rs7854413 | C/T | PDCD1LG2 | 9  | 5547708   | 5       | missense[NM_025239.2]                                               |

|     |           |     |          |    |           |         |                                                                            |
|-----|-----------|-----|----------|----|-----------|---------|----------------------------------------------------------------------------|
| 832 | rs7857730 | G/T | JAK2     | 9  | 5074049   | No Data | intron[NM_004972.2]                                                        |
| 833 | rs7859390 | A/T | JAK2     | 9  | 5052473   | 6       | intron[NM_004972.2]                                                        |
| 834 | rs7864330 | G/T | TLR4     | 9  | 119509371 | 6       | intron[NM_138554.2]                                                        |
| 835 | rs7865082 | A/G | DDX58    | 9  | 32447558  | 6       | intron[NM_014314.3]                                                        |
| 836 | rs7865462 | C/T | TNC      | 9  | 116862935 | No Data | intron[NM_002160.2]                                                        |
| 837 | rs7869402 | C/T | TLR4     | 9  | 119517853 | 4       | utr-3[NM_138554.2]                                                         |
| 838 | rs7897947 | G/T | NFKB2    | 10 | 104147701 | 2a      | intron[NM_002502.3];intron[NM_001077493.1]                                 |
| 839 | rs7943404 | A/G | CH13L1   | 11 | 102103785 | No Data | Promoter                                                                   |
| 840 | rs7970260 | A/C | ICOS     | 12 | 6419322   | 6       | Promoter                                                                   |
| 841 | rs8057341 | A/G | NOD2     | 16 | 49295481  | 6       | intron[NM_022162.1]                                                        |
| 842 | rs8075442 | C/T | STAT3    | 17 | 37736929  | No Data | intron[NM_213662.1];intron[NM_139276.2]                                    |
| 843 | rs8078731 | A/T | STAT3    | 17 | 37733907  | 6       | intron[NM_213662.1];intron[NM_139276.2]                                    |
| 844 | rs8079416 | C/T | IL10     | 17 | 35346239  | 6       | Promoter                                                                   |
| 845 | rs8140265 | A/G | TXNRD2   | 22 | 18301641  | No Data | intron[NM_006440.3]                                                        |
| 846 | rs816293  | C/G | NOS1     | 12 | 116247082 | 6       | intron[NM_000620.1]                                                        |
| 847 | rs8176348 | C/T | CYP27B1  | 12 | 56443400  | 5       | intron[NM_000785.3]                                                        |
| 848 | rs8176353 | A/T | CYP27B1  | 12 | 56441489  | 5       | near-gene-3[NM_000785.3]                                                   |
| 849 | rs843429  | A/G | DPP10    | 2  | 115937478 | No Data | intron[NM_001004360.2]                                                     |
| 850 | rs867174  | A/G | JAK3     | 19 | 17813930  | 4       | intron[NM_000215.2]                                                        |
| 851 | rs8674    | C/T | IL4R     | 16 | 27283390  | 2b      | utr-3[NM_000418.2]                                                         |
| 852 | rs869402  | C/T | GSDML    | 17 | 35321569  | 6       | intron[NM_018530.2]                                                        |
| 853 | rs880633  | C/T | CHI3L1   | 1  | 201419424 | 5       | reference[NM_001276.2]                                                     |
| 854 | rs880678  | A/G | CMA1     | 14 | 24044884  | 6       | intron[NM_001836.2]                                                        |
| 855 | rs9034    | C/T | NAMPT    | 7  | 105677292 | 5       | utr-3[NM_005746.2]                                                         |
| 856 | rs906134  | C/G | GUSB     | 7  | 65081723  | No Data | intron[NM_000181.2]                                                        |
| 857 | rs913594  | C/T | JAK2     | 9  | 5053199   | No Data | intron[NM_004972.2]                                                        |
| 858 | rs916055  | C/T | ALOX15   | 17 | 4481583   | No Data | utr-3[NM_001140.3]                                                         |
| 859 | rs9270665 | G/T | HLA-DRB1 | 6  | 32674210  | 6       | -                                                                          |
| 860 | rs9277378 | A/G | HLA-DPB1 | 6  | 33158257  | 6       | intron[NM_002121.4]                                                        |
| 861 | rs9277419 | A/G | HLA-DPB1 | 6  | 33159755  | No Data | intron[NM_002121.4]                                                        |
| 862 | rs9277535 | A/G | HLA-DPB1 | 6  | 33162839  | 6       | utr-3[NM_002121.4]                                                         |
| 863 | rs9277935 | G/T | RXRΒ     | 6  | 33268403  | 1b      | near-gene-5[NM_080680.2];near-gene-5[NM_080679.2];near-gene-3[NM_021976.3] |
| 864 | rs9282745 | A/T | IL4      | 5  | 132041899 | 5       | intron[NM_172348.1]                                                        |
| 865 | rs9303277 | C/T | IKZF3    | 17 | 35229995  | 6       | intron[NM_183232.1]                                                        |
| 866 | rs93059   | C/T | NFKB1    | 4  | 103687547 | 1f      | intron[NM_003998.2]                                                        |
| 867 | rs932272  | C/T | NOD1     | 7  | 30479684  | 3a      | intron[NM_006092.1]                                                        |
| 868 | rs933271  | C/T | COMT     | 22 | 18311407  | 4       | intron[NM_000754.2]                                                        |
| 869 | rs944724  | C/T | NOS2A    | 17 | 23133544  | 5       | intron[NM_000625.3]                                                        |
| 870 | rs944725  | C/T | NOS2A    | 17 | 23133698  | No Data | intron[NM_000625.3]                                                        |
| 871 | rs9462851 | A/G | PTCRA    | 6  | 42998580  | 6       | intron[NM_138296.2]                                                        |
| 872 | rs9471960 | A/C | PTCRA    | 6  | 42992728  | No Data | intron[NM_138296.2]                                                        |
| 873 | rs9494145 | C/T | MYB      | 6  | 135474245 | No Data | -                                                                          |

|     |           |       |          |    |           |         |                                          |
|-----|-----------|-------|----------|----|-----------|---------|------------------------------------------|
| 874 | rs9500928 | C/T   | HLA-DPB1 | 6  | 33157672  | 6       | intron[NM_002121.4]                      |
| 875 | rs9509    | C/T   | MMP9     | 20 | 44078560  | 6       | utr-3[NM_004994.2]                       |
| 876 | rs9530    | C/T   | GUSB     | 7  | 65063329  | 5       | missense[NM_000181.2]                    |
| 877 | rs9658562 | A/T   | NOS1     | 12 | 116136440 | 6       | utr-3[NM_000620.1]                       |
| 878 | rs966871  | A/T   | JAK2     | 9  | 5111070   | No Data | intron[NM_004972.2]                      |
| 879 | rs9729    | A/C/G | VDR      | 12 | 46522890  | 5       | utr-3[NM_000376.2]                       |
| 880 | rs9784858 | C/G   | HLA-DOB  | 6  | 32895153  | 6       | -                                        |
| 881 | rs9784876 | A/C   | TAP2     | 6  | 32896856  | 5       | near-gene-3[NM_018833.2]                 |
| 882 | rs9836399 | A/G   | CD86     | 3  | 123294501 | 6       | intron[NM_006889.3]                      |
| 883 | rs9848900 | A/G   | CD86     | 3  | 123314187 | 6       | intron[NM_006889.3]                      |
| 884 | rs9855093 | A/G   | CD80     | 3  | 120731011 | 6       | intron[NM_005191.3]                      |
| 885 | rs9869655 | A/G   | IL5RA    | 3  | 3096857   | 6       | intron[NM_175726.1]                      |
| 886 | rs9883988 | A/G   | COL29A1  | 3  | 131645085 | 6       | reference[NM_153264.4]                   |
| 887 | rs988885  | C/T   | SPINK5   | 5  | 147468178 | No Data | intron[NM_006846.2]                      |
| 888 | rs9890802 | A/C   | STAT3    | 17 | 37747327  | 5       | intron[NM_213662.1]; intron[NM_139276.2] |
| 889 | rs9901146 | A/G   | CHRM3    | 17 | 35296869  | 6       | Downstream                               |
| 890 | rs9912773 | C/G   | STAT3    | 17 | 37764060  | 1f      | intron[NM_213662.1]; intron[NM_139276.2] |
| 891 | rs9926974 | C/T   | NLRC3    | 16 | 3565568   | 5       | intron[NM_178844.2]                      |
| 892 | rs9930893 | A/C   | NLRC3    | 16 | 3565449   | 5       | intron[NM_178844.2]                      |
| 893 | rs993986  | C/T   | DPP10    | 2  | 115819691 | No Data | intron[NM_020868.2]                      |
| 894 | rs9972960 | A/G   | CHML     | 17 | 31444192  | 5       | Promoter                                 |
| 895 | rs9986640 | A/G   | HLA-DOB  | 6  | 32872948  | 2a      | -                                        |

**Alleles:** An alternative form of a gene (one member of a pair) that is located at a specific position on a specific chromosome.

**Gene:** Selected Genes

**Chr:** Chromosome number stands for gene position

**Position:** Chromosome Position stands for SNP position on gene.

**Regulome DB score:** This is the scoring scheme refers to the following available data types for a single coordinate: 1a: eQTL + TF binding + matched TF motif + matched DNase Footprint + DNase peak; 1b: eQTL + TF binding + any motif + DNase Footprint + DNase peak; 1c: eQTL + TF binding + matched TF motif + DNase peak; 1d: eQTL + TF binding + any motif + DNase peak; 1f: eQTL + TF binding / DNase peak; 2a: TF binding + matched TF motif + matched DNase Footprint + DNase peak; 2b: TF binding + matched TF motif + matched DNase Footprint + DNase peak; 2c: TF binding + matched TF motif + DNase peak; 3a: TF binding + any motif + DNase peak; 3b: TF binding + matched TF motif; 4: TF binding + DNase peak; 5: TF binding or DNase peak; and 6: others.

**Table S2. Clinical information**

| <b>ID</b> | <b>Race</b>              | <b>Gender</b> | <b>Age at IgE testing</b> | <b>Total IgE</b> | <b>d1</b> | <b>d2</b> | <b>I6</b> | <b>e1</b> | <b>e5</b> | <b>m6</b> |
|-----------|--------------------------|---------------|---------------------------|------------------|-----------|-----------|-----------|-----------|-----------|-----------|
| 1         | Hispanic                 | male          | 6.7707                    | 36.99            | 0.183     | 0         | 0.026     | 0.007     | 0.0358    | 0.0238    |
| 2         | Black / African American | female        | 8.62149                   | 643.36           | 0.034     | 0.018     | 0.045     | 0.018     | 0.0405    | 0.1116    |
| 3         | Black / African American | female        | 8.03559                   | 29.93            | 0.01      | 0         | 0.012     | 0.007     | 0.0458    | 0.0329    |
| 4         | Hispanic                 | male          | 6.92129                   | 1869.35          | 0.748     | 0         | 0.56      | 126.819   | 66.1872   | 2.2295    |
| 5         | Hispanic                 | female        | 7.21971                   | 755.75           | 1.451     | 0         | 83.25     | 0.04      | 0.1094    | 0.0493    |
| 6         | Black / African American | male          | 6.68309                   | 44.42            | 0.016     | 0         | 0.012     | 0.002     | 0.0173    | 0.2193    |
| 7         | Hispanic                 | male          | 6.51061                   | 8.34             | 0.055     | 0         | 0.018     | 0         | 0.0114    | 0.0399    |
| 8         | Black / African American | male          | 8.50924                   | 49.68            | 0.018     | 0         | 0.004     | 0.004     | 0.0122    | 0.0757    |
| 9         | Black / African American | male          | 7.47707                   | 9.41             | 0.005     | 0         | 0         | 0         | 0.0129    | 0.0268    |
| 10        | Black / African American | female        | 8.61602                   | 2101.83          | 0.812     | 0.7698    | 1.864     | 7.405     | 2.438     | 54.6995   |
| 11        | Hispanic                 | female        | 7.59206                   | 189.96           | 6.924     | 0         | 0.054     | 0.009     | 0.0733    | 0.0475    |
| 12        | Black / African American | female        | 7.50719                   | 60.57            | 0.899     | 0         | 0.089     | 0         | 0.0245    | 0.1265    |
| 13        | White                    | female        | 7.99452                   | 26.78            | 0.004     | 0         | 0.007     | 0         | 0.0068    | 0.0958    |
| 14        | Hispanic                 | male          | 6.57632                   | 55.53            | 2.686     | 0         | 0.131     | 2.967     | 0.4683    | 0.0328    |
| 15        | Cap Verdean              | male          | 6.57084                   | 14.18            | 0         | 0         | 0         | 0         | 0.0049    | 0.0396    |
| 16        | Black / African American | male          | 8.36961                   | 125.89           | 13.905    | 3.8052    | 0.017     | 0.027     | 0.0533    | 0.108     |
| 17        | Hispanic                 | male          | 6.73238                   | 28.89            | 0.264     | 0         | 1.727     | 0.056     | 0.01      | 0.0442    |
| 18        | Black / African American | male          | 8.70363                   | 37.19            | 0.029     | 0.016     | 0.165     | 0.006     | 0.0658    | 0.0613    |
| 19        | Black / African American | male          | 7.16769                   | 400.21           | 0.011     | 0         | 0.006     | 0.02      | 0.0449    | 0.0275    |
| 20        | Black / African American | female        | 8.01643                   | 86.68            | 0.265     | 0.3021    | 0.062     | 0.023     | 0.0491    | 0.0904    |
| 21        | Hispanic                 | male          | 7.60849                   | 44.75            | 0.003     | 0         | 0.004     | 0.001     | 0.0157    | 0.042     |
| 22        | Black / African American | male          | 7.07187                   | 50.95            | 0         | 0         | 0         | 1.245     | 0.0895    | 0.0173    |
| 23        | Black / African American | female        | 5.99589                   | 68.82            | 0.012     | 0         | 0         | 0.748     | 21.6354   | 0.0248    |
| 24        | White                    | male          | 6.81177                   | 2.42             | 0.004     | 0         | 0.003     | 0         | 0.0065    | 0.0764    |
| 25        | Black / African American | female        | 7.65229                   | 142.5            | 0.012     | 0.016     | 0.049     | 0.027     | 0.1143    | 0.154     |
| 26        | Black / African American | female        | 6.04791                   | 166.76           | 0.021     | 0         | 0.01      | 0.006     | 0.0215    | 0.0243    |
| 27        | Black / African American | male          | 6.84736                   | 19.59            | 0         | 0         | 0         | 0         | 0.0036    | 0.0371    |
| 28        | Black / African American | female        | 5.86721                   | 7.52             | 0         | 0         | 0         | 0.548     | 0.0423    | 0.2703    |
| 29        | Unknown                  | female        | 6.02601                   | 54.22            | 0.066     | 0         | 0         | 0.034     | 0.0297    | 0.0395    |
| 30        | mixed                    | male          | 5.295                     | 238.78           | 0.035     | 0         | 0.028     | 2.062     | 0.1383    | 0.064     |
| 31        | Black / African American | female        | 6.02875                   | 172.27           | 0.013     | 0         | 0.681     | 0.008     | 0.0173    | 0.0206    |
| 32        | Black / African American | female        | 6.27515                   | 1007.21          | 1.261     | 0         | 0.841     | 14.874    | 6.0565    | 5.9859    |
| 33        | Black / African American | male          | 6.55441                   | 63.75            | 0         | 0         | 0         | 0         | 0.0006    | 0.0275    |
| 34        | Black / African American | female        | 7.02806                   | 1.76             | 0.006     | 0         | 0.012     | 0.003     | 0.0137    | 0.067     |
| 35        | Unknown                  | male          | 8.47912                   | 1513.05          | 18.805    | 25.6269   | 0.195     | 4.15      | 3.4695    | 17.1599   |
| 36        | Black / African American | female        | 6.73238                   | 537.36           | 0.11      | 0.0821    | 0.061     | 3.532     | 1.4427    | 0.1147    |
| 37        | Black / African American | female        | 5.32786                   | 76.15            | 0         | 0         | 0         | 0         | 0.007     | 0.0127    |

|    |                          |        |         |         |         |        |        |        |         |        |
|----|--------------------------|--------|---------|---------|---------|--------|--------|--------|---------|--------|
| 38 | Hispanic                 | male   | 6.91034 | 45.39   | 0.628   | 0      | 0.138  | 0.007  | 0.0615  | 0.0195 |
| 39 | Asian/ Pacific           | male   | 6.59001 | 30.94   | 0       | 0      | 0      | 0.009  | 0.0166  | 0.0136 |
| 40 | Black / African American | female | 7.50719 | 81.98   | 0.008   | 0.0067 | 0.007  | 0.01   | 0.0035  | 0.0721 |
| 41 | Black / African American | male   | 5.577   | 27.66   | 0.219   | 0      | 0.031  | 0      | 0.0138  | 0.0231 |
| 42 | Black / African American | female | 4.98563 | 853.39  | 0.171   | 0      | 3.738  | 10.546 | 0.3074  | 0.0422 |
| 43 | Black / African American | male   | 5.8371  | 8.76    | 0.006   | 0      | 0.006  | 0      | 0.0037  | 0.0187 |
| 44 | Black / African American | female | 5.09514 | 43.84   | 0.139   | 0      | 0.022  | 0      | 0.0158  | 0.0766 |
| 45 | Hispanic                 | male   | 6.52704 | 39.63   | 0.001   | 0      | 0.033  | 0      | 0.0591  | 0.0279 |
| 46 | Black / African American | male   | 6.00411 | 27.42   | 0.001   | 0      | 0.001  | 0.008  | 0.0035  | 0.0472 |
| 47 | Black / African American | male   | 8.21903 | 37.31   | 0.037   | 0.0246 | 0.015  | 0.002  | 0.0078  | 0.0679 |
| 48 | Black / African American | male   | 4.50376 | 81.99   | 0.35    | 0      | 0.124  | 0      | 0.0809  | 0.0605 |
| 49 | Black / African American | female | 8.20808 | 43.98   | 4.953   | 5.4417 | 0.02   | 0.401  | 0.0999  | 0.2862 |
| 50 | Cap Verdean              | female | 6.93224 | 3.82    | 0.017   | 0      | 0.003  | 0      | 0.0073  | 0.0296 |
| 51 | Black / African American | male   | 6.59001 | 87.08   | 0.009   | 0      | 0.011  | 0.014  | 0.0251  | 0.0275 |
| 52 | Black / African American | female | 5.11978 | 81.44   | 0.019   | 0      | 0.016  | 0.004  | 0.0147  | 0.0224 |
| 53 | Cap Verdean              | male   | 5.24572 | 30.24   | 0.008   | 0      | 0.013  | 0.002  | 0.0121  | 0.0342 |
| 54 | Hispanic                 | female | 6.11636 | 185.54  | 0       | 0      | 0.852  | 0.777  | 0.0838  | 0.0179 |
| 55 | Hispanic                 | female | 4.75838 | 213.12  | 0.092   | 0      | 0.005  | 0.004  | 0.0201  | 0.0133 |
| 56 | Black / African American | female | 3.93429 | 2603.72 | 1.386   | 0      | 5.132  | 60.248 | 8.3687  | 3.7929 |
| 57 | Black / African American | female | 5.82067 | 104.88  | 0.018   | 0.0063 | 0.043  | 0      | 0.0074  | 0.1099 |
| 58 | Unknown                  | female | 7.09925 | 29.69   | 0.004   | 0      | 0      | 0.002  | 0.0278  | 0.107  |
| 59 | Black / African American | male   | 4.34223 | 33.67   | 0.008   | 0      | 0.152  | 0.001  | 0.001   | 0.0237 |
| 60 | Hispanic                 | male   | 6.14648 | 148.7   | 1.517   | 0      | 2.817  | 0.217  | 0.7459  | 0.0425 |
| 61 | Black / African American | female | 7.04997 | 24.16   | 0.007   | 0      | 0.009  | 0      | 0.0116  | 0.0714 |
| 62 | Hispanic                 | female | 5.01574 | 15.98   | 2.98    | 0      | 0.782  | 0.04   | 0.1887  | 0.0365 |
| 63 | Hispanic                 | female | 6.93771 | 9.64    | 0.008   | 0.0011 | 0.002  | 0.007  | 0.0173  | 0.0684 |
| 64 | Black / African American | female | 4.21629 | 11.66   | 0       | 0      | 0      | 0      | 0.0137  | 0.0197 |
| 65 | Black / African American | male   | 3.89596 | 21.21   | 0.016   | 0      | 0.01   | 0      | 0.0063  | 0.0204 |
| 66 | Black / African American | female | 6.66119 | 42.7    | 0.005   | 0      | 0.004  | 0.001  | 0.0075  | 0.0632 |
| 67 | White                    | male   | 5.09788 | 0.43    | 0.14    | 0.0215 | 0      | 0.001  | 0.0061  | 0.0873 |
| 68 | Black / African American | male   | 4.01369 | 6.61    | 0       | 0      | 0      | 0      | 0.0071  | 0.0224 |
| 69 | Cap Verdean              | female | 5.40726 | 76.25   | 10.568  | 0      | 0      | 0      | 0.023   | 0.0345 |
| 70 | Black / African American | female | 4.03012 | 57.23   | 0       | 0      | 0      | 0      | 0.0147  | 0.0207 |
| 71 | Black / African American | male   | 6.06708 | 89.81   | 1.628   | 0      | 0.092  | 0.004  | 0.0494  | 0.0095 |
| 72 | Black / African American | female | 3.53457 | 103.7   | 0.003   | 0      | 0.001  | 0      | 0.0173  | 0.0217 |
| 73 | Black / African American | male   | 3.64408 | 73.22   | 1.283   | 0      | 2.694  | 0.021  | 0.0881  | 0.0367 |
| 74 | Black / African American | male   | 4.36413 | 246.37  | 68.644  | 0      | 0.013  | 0.034  | 0.1832  | 0.0333 |
| 75 | Black / African American | female | 5.88912 | 1419.93 | 1.749   | 0      | 95.517 | 1.673  | 13.8196 | 0.3017 |
| 76 | White                    | female | 6.57084 | 403.05  | 0.066   | 1.6803 | 0.033  | 0.858  | 1.9411  | 0.1012 |
| 77 | Cap Verdean              | female | 5.06229 | 580.8   | 57.595  | 0      | 0.006  | 0.019  | 0.0845  | 0.0281 |
| 78 | Black / African American | male   | 3.52088 | 1426.93 | 158.919 | 0      | 0.092  | 0.094  | 0.4589  | 0.0603 |
| 79 | Black / African American | female | 6.59274 | 53.2    | 0.006   | 0      | 0.005  | 0.007  | 0.0057  | 0.0904 |
| 80 | Hispanic                 | female | 5.10883 | 785.85  | 0.215   | 0.207  | 0.151  | 133.1  | 20.8546 | 0.2253 |
| 81 | Black / African American | male   | 5.68378 | 28.46   | 0       | 0      | 0      | 0      | 0.0119  | 0.0127 |

|     |                          |        |         |        |        |         |        |        |        |        |
|-----|--------------------------|--------|---------|--------|--------|---------|--------|--------|--------|--------|
| 82  | Black / African American | female | 4.59138 | 63.36  | 0.804  | 0.179   | 0.003  | 0.005  | 0.0084 | 0.1032 |
| 83  | Black / African American | female | 3.19507 | 29.36  | 1.989  | 0       | 0.027  | 0.003  | 0.089  | 0.0002 |
| 84  | Cap Verdean              | female | 4.8898  | 47.48  | 0.002  | 0       | 0      | 0.001  | 0.0294 | 0.0357 |
| 85  | Hispanic                 | male   | 5.05955 | 29.99  | 0.028  | 0.0103  | 0.014  | 0.004  | 0.0132 | 0.0887 |
| 86  | Hispanic                 | female | 3.00616 | 120.89 | 0      | 0       | 0.105  | 1.971  | 0.1035 | 0.0241 |
| 87  | Black / African American | male   | 4.25188 | 102.91 | 0.571  | 0       | 0.16   | 0.031  | 0.0514 | 0.0449 |
| 88  | Black / African American | male   | 7.39493 | 28.82  | 0.065  | 0.0436  | 0.781  | 0      | 0.0173 | 0.0734 |
| 89  | Black / African American | male   | 4.17522 | 103.19 | 0.434  | 0       | 0.072  | 0.005  | 0.0528 | 0.0504 |
| 90  | Black / African American | male   | 3.27721 | 83.63  | 0      | 0       | 0      | 0      | 0.0217 | 0.0249 |
| 91  | Hispanic                 | female | 2.97878 | 121.51 | 0.343  | 0       | 0.199  | 0.06   | 0.092  | 0.0682 |
| 92  | Black / African American | male   | 4.88159 | 32.32  | 0      | 0       | 0      | 0      | 0.0838 | 0      |
| 93  | Hispanic                 | male   | 3.36482 | 27.41  | 0.011  | 0       | 0      | 0      | 0.0097 | 0.0448 |
| 94  | Black / African American | male   | 3.49897 | 5.91   | 0      | 0       | 0      | 0      | 0.0061 | 0.0047 |
| 95  | Black / African American | female | 4.22998 | 88.27  | 24.159 | 25.3792 | 0.009  | 0.01   | 0.0209 | 0.0682 |
| 96  | Asian/ Pacific           | female | 3.00616 | 30.46  | 0      | 0       | 0      | 0.015  | 0.005  | 0.0409 |
| 97  | Black / African American | female | 5.56057 | 94.38  | 0.012  | 0       | 0      | 0      | 0.0109 | 0.0046 |
| 98  | Black / African American | male   | 5.95209 | 54.21  | 0.008  | 0       | 0.01   | 0      | 0.0143 | 0.0219 |
| 99  | Black / African American | male   | 3.50719 | 172.38 | 0.01   | 0       | 0.003  | 0.005  | 0.0297 | 0.0489 |
| 100 | Hispanic                 | male   | 3.01985 | 117.4  | 0.007  | 0       | 0      | 0      | 0.0273 | 0.0065 |
| 101 | Black / African American | male   | 2.46954 | 841.79 | 0.2    | 0       | 0.056  | 9.844  | 5.1819 | 0.0999 |
| 102 | Black / African American | male   | 6.53799 | 13.49  | 0.012  | 0       | 0      | 0.002  | 0.0073 | 0.0701 |
| 103 | Black / African American | male   | 5.11157 | 382.49 | 0.107  | 0       | 47.594 | 45.102 | 1.8382 | 0.0512 |
| 104 | Hispanic                 | female | 4.67899 | 362.24 | 0.075  | 0.0392  | 0.041  | 0.258  | 0.5012 | 0.1648 |
| 105 | Black / African American | female | 4.09856 | 20.88  | 0.007  | 0       | 0.007  | 0.001  | 0.007  | 0.0691 |
| 106 | Black / African American | male   | 3.00616 | 11.86  | 0      | 0       | 0      | 0      | 0.0058 | 0.0488 |
| 107 | Black / African American | male   | 6.62012 | 65.65  | 0.01   | 0       | 0.017  | 0.006  | 0.0404 | 0.1231 |
| 108 | Hispanic                 | male   | 5.74675 | 53.94  | 0.012  | 0       | 0.02   | 0      | 0.019  | 0.0443 |
| 109 | Hispanic                 | female | 2.25325 | 11.13  | 0.005  | 0       | 0.001  | 0      | 0.0043 | 0.0879 |
| 110 | Hispanic                 | male   | 4.52841 | 36.78  | 0      | 0       | 0      | 0.001  | 0.0182 | 0.0358 |
| 111 | Cap Verdean              | male   | 4.59411 | 22     | 0.006  | 0       | 0.002  | 0      | 0.017  | 0.0092 |
| 112 | Black / African American | female | 4.11499 | 2.33   | 0.009  | 0       | 0.008  | 0      | 0.0103 | 0.1059 |
| 113 | Hispanic                 | male   | 6.40931 | 23.67  | 0.022  | 0.0023  | 0.014  | 0.009  | 0.0124 | 0.087  |
| 114 | Hispanic                 | male   | 4.92539 | 154.78 | 0      | 0       | 0      | 0.008  | 0.065  | 0.0297 |
| 115 | Black / African American | female | 4.5859  | 18.85  | 0      | 0       | 0.026  | 0      | 0.0545 | 0      |
| 116 | Black / African American | female | 3.03901 | 11.13  | 0.05   | 0       | 0.008  | 0      | 0.0058 | 0.0237 |
| 117 | Black / African American | male   | 4.2026  | 13.69  | 0      | 0       | 0      | 0      | 0.008  | 0.0235 |
| 118 | Hispanic                 | male   | 1.94387 | 65.35  | 0      | 0       | 0.004  | 0      | 0.0056 | 0.5695 |
| 119 | Asian/ Pacific           | male   | 2.30527 | 15.46  | 0      | 0       | 0      | 0      | 0.0138 | 0.0195 |
| 120 | Black / African American | male   | 6.05339 | 413.7  | 0.058  | 0.0387  | 0.045  | 6.238  | 0.6095 | 0.0788 |
| 121 | Black / African American | female | 2.53525 | 42.99  | 0.018  | 0       | 0.012  | 0.651  | 0.3607 | 0.0245 |
| 122 | Cap Verdean              | male   | 5.23477 | 28.3   | 0.009  | 0       | 0.011  | 0.007  | 0.0124 | 0.0181 |
| 123 | Black / African American | male   | 1.7358  | 43.52  | 0.009  | 0       | 0.012  | 0.003  | 0.0387 | 0.2783 |
| 124 | Hispanic                 | male   | 3.07461 | 87.14  | 0.831  | 0       | 0.13   | 0.025  | 0.0403 | 0.0501 |
| 125 | Black / African American | male   | 2.72142 | 6.93   | 0.008  | 0       | 0.011  | 0      | 0.0327 | 0.0424 |

|     |                          |        |         |         |         |        |        |       |        |        |
|-----|--------------------------|--------|---------|---------|---------|--------|--------|-------|--------|--------|
| 126 | Hispanic                 | female | 4.88433 | 329.95  | 0.463   | 0.2547 | 13.385 | 0.063 | 0.0944 | 0.0777 |
| 127 | Black / African American | female | 4.92539 | 42.84   | 0       | 0      | 0      | 0     | 0.008  | 0      |
| 128 | Black / African American | female | 4.01643 | 15.41   | 0.002   | 0      | 0.006  | 0     | 0.0075 | 0.0642 |
| 129 | Black / African American | male   | 4.23272 | 112.09  | 0.029   | 0.0119 | 0.052  | 0.008 | 0.0698 | 0.0893 |
| 130 | White                    | female | 2.65845 | 13.27   | 0.004   | 0      | 0.011  | 0.001 | 0.0106 | 0.0479 |
| 131 | Black / African American | female | 2.49966 | 340.01  | 0.016   | 0      | 0.009  | 0.019 | 0.0435 | 0.0577 |
| 132 | Black / African American | female | 6.37372 | 116.07  | 0.109   | 0.0974 | 0.023  | 0     | 0.0318 | 0.403  |
| 133 | Black / African American | male   | 5.28679 | 73.94   | 0.013   | 0      | 4.398  | 0.053 | 0.0269 | 0.0293 |
| 134 | Black / African American | female | 4.04654 | 10.45   | 0.01    | 0      | 0.005  | 0     | 0.0216 | 0.0195 |
| 135 | Black / African American | female | 3.2553  | 75      | 0.012   | 0.0016 | 0.008  | 0.003 | 0.0145 | 0.0664 |
| 136 | Black / African American | female | 2.15743 | 137.08  | 0.005   | 0      | 0.003  | 0.009 | 0.084  | 0.0066 |
| 137 | Black / African American | female | 2.00684 | 36.51   | 0       | 0      | 0.001  | 0     | 0.0019 | 0.0022 |
| 138 | Black / African American | male   | 3.73169 | 35.59   | 2.183   | 3.4041 | 0.018  | 0.004 | 0.0301 | 0.1074 |
| 139 | Unknown                  | male   | 2.04791 | 37.07   | 0.092   | 0      | 0.013  | 0     | 0.0144 | 0      |
| 140 | Black / African American | male   | 5.02122 | 134.72  | 0.012   | 0      | 0.011  | 0.019 | 0.0242 | 0.022  |
| 141 | Black / African American | male   | 2.87474 | 0       | 0.009   | 0      | 0.001  | 0.046 | 0.004  | 0.0729 |
| 142 | Black / African American | male   | 3.54825 | 99.48   | 0.042   | 0.0151 | 0.01   | 0.002 | 0.0149 | 0.0952 |
| 143 | Hispanic                 | female | 5.20739 | 221.6   | 53.622  | 0      | 0.066  | 0.115 | 0.0827 | 0.0376 |
| 144 | Black / African American | male   | 1.88638 | 75.1    | 0.503   | 0      | 0.112  | 0     | 0.0252 | 0.0205 |
| 145 | Black / African American | female | 6.19576 | 206.73  | 0.029   | 0.0115 | 0.023  | 0.018 | 0.0263 | 0.0851 |
| 146 | Black / African American | female | 1.67283 | 22.04   | 0       | 0      | 0      | 0.006 | 0.006  | 0.0413 |
| 147 | Unknown                  | male   | 4.04381 | 32.87   | 0.006   | 0      | 0.01   | 0.004 | 0.0175 | 0.0215 |
| 148 | Hispanic                 | male   | 4.08487 | 27.87   | 0       | 0      | 0      | 0     | 0.0112 | 0.017  |
| 149 | Black / African American | female | 4.16701 | 226.54  | 0.117   | 0      | 0      | 0.007 | 0.0319 | 0.0242 |
| 150 | White                    | male   | 4.06845 | 620.3   | 105.671 | 0      | 1.098  | 0.566 | 0.2247 | 0.0175 |
| 151 | Black / African American | female | 1.6345  | 0.22    | 0       | 0      | 0      | 0     | 0.0035 | 0.02   |
| 152 | Hispanic                 | male   | 2.88569 | 9.16    | 0.007   | 0      | 0.001  | 0.002 | 0.0035 | 0.069  |
| 153 | Black / African American | female | 1.99863 | 8.54    | 0.054   | 0.0381 | 0.013  | 0.004 | 0.0128 | 0.0912 |
| 154 | Black / African American | male   | 4.03559 | 5.81    | 0.185   | 0      | 0.014  | 0     | 0.0027 | 0.0632 |
| 155 | Black / African American | male   | 1.33333 | 537.22  | 12.982  | 0      | 17.436 | 0.182 | 0.2595 | 0.0452 |
| 156 | Cap Verdean              | female | 1.01574 | 76.39   | 0.01    | 0      | 0.005  | 0.003 | 0.0549 | 0.0411 |
| 157 | Hispanic                 | male   | 6.34086 | 122.2   | 0.046   | 0.014  | 0.024  | 0.044 | 0.3235 | 0.0702 |
| 158 | Hispanic                 | female | 1.05407 | 35.58   | 0.05    | 0      | 0.025  | 0     | 0.0444 | 0.0255 |
| 159 | White                    | male   | 4.03285 | 82.81   | 0.012   | 0      | 0.007  | 0     | 0.0045 | 0.0255 |
| 160 | Black / African American | male   | 0.83778 | 0.31    | 0       | 0      | 0      | 0     | 0.0079 | 0.0406 |
| 161 | Hispanic                 | male   | 3.90418 | 73.7    | 0       | 0      | 0.007  | 0     | 0.0097 | 0.0173 |
| 162 | Hispanic                 | male   | 1.00479 | 32.23   | 0       | 0      | 0      | 0     | 0.031  | 0.0443 |
| 163 | White                    | male   | 1.57426 | 12.86   | 0.006   | 0      | 0.003  | 0.007 | 0.0031 | 0.097  |
| 164 | Black / African American | female | 1.46201 | 1039.86 | 16.814  | 0      | 32.182 | 2.175 | 1.2218 | 0.1218 |
| 165 | Hispanic                 | male   | 0.83778 | 16.2    | 0.001   | 0      | 0.007  | 0     | 0.005  | 0.0267 |
| 166 | Hispanic                 | female | 1.04586 | 0       | 0       | 0      | 0      | 0     | 0.0016 | 0.0275 |
| 167 | Black / African American | male   | 0.73101 | 18.59   | 0       | 0      | 0      | 0.029 | 0.0103 | 0.0221 |
| 168 | Hispanic                 | female | 1.99589 | 23.82   | 0.015   | 0      | 0.018  | 0.001 | 0.02   | 0.052  |
| 169 | Black / African American | male   | 0.8104  | 24.4    | 0       | 0      | 0      | 0     | 0.0225 | 0      |

|     |                          |        |         |         |        |        |       |        |        |        |
|-----|--------------------------|--------|---------|---------|--------|--------|-------|--------|--------|--------|
| 170 | Black / African American | male   | 4.98289 | 342.95  | 0.213  | 0      | 0.055 | 0.007  | 0.0121 | 0.0362 |
| 171 | Hispanic                 | male   | 5.06502 | 6.01    | 0.261  | 0      | 0.003 | 0      | 0.0155 | 0.0268 |
| 172 | Hispanic                 | male   | 0.77207 | 4.14    | 0.002  | 0      | 0.018 | 0.021  | 0.0383 | 0.0199 |
| 173 | Black / African American | male   | 0.67625 | 11.78   | 0      | 0      | 0     | 0      | 0.0073 | 0.0274 |
| 174 | Black / African American | female | 4.29569 | 329.64  | 11.736 | 0      | 5.189 | 9.219  | 3.8133 | 0.0732 |
| 175 | Black / African American | male   | 1.30048 | 7.89    | 0.007  | 0      | 0     | 0      | 0.0046 | 0.0137 |
| 176 | Hispanic                 | female | 1.5551  | 24.14   | 0.035  | 0.011  | 0.022 | 0.021  | 0.0274 | 0.1122 |
| 177 | Black / African American | female | 2.51335 | 67.34   | 0.009  | 0      | 0.025 | 0.006  | 0.034  | 0.0889 |
| 178 | Black / African American | female | 1.41547 | 6.61    | 0.008  | 0      | 0.004 | 0.007  | 0.0178 | 0.032  |
| 179 | Black / African American | male   | 5.00753 | 130.84  | 0.019  | 0      | 0.012 | 0.002  | 0.0322 | 0.0285 |
| 180 | Black / African American | male   | 0.52841 | 3851.1  | 0.466  | 0.3498 | 1.369 | 9.946  | 1.3714 | 0.2378 |
| 181 | White                    | male   | 2.81451 | 28.86   | 0.008  | 0      | 0.024 | 0.01   | 0.0196 | 0.0911 |
| 182 | Black / African American | female | 0.72553 | 14.54   | 0      | 0      | 0     | 0      | 0.0119 | 0.0389 |
| 183 | Hispanic                 | female | 0.8104  | 8.5     | 0      | 0      | 0.008 | 0      | 0.0248 | 0.0332 |
| 184 | Black / African American | male   | 4.89254 | 19.27   | 0.014  | 0      | 0.013 | 0.725  | 0.064  | 0.0272 |
| 185 | Black / African American | female | 4.71732 | 35.63   | 0      | 0      | 0.009 | 0.002  | 0.0215 | 0.0376 |
| 186 | Black / African American | female | 1.10335 | 1.57    | 0      | 0      | 0     | 0      | 0.0108 | 0.0142 |
| 187 | Black / African American | male   | 0.52019 | 4.99    | 0      | 0      | 0.01  | 0.005  | 0.0278 | 0.0374 |
| 188 | Black / African American | female | 0.57769 | 13.24   | 0      | 0      | 0.037 | 0.001  | 0.022  | 0.0334 |
| 189 | Black / African American | male   | 0.74743 | 4.41    | 0      | 0      | 0     | 0      | 0.003  | 0.0268 |
| 190 | Black / African American | male   | 1.01027 | 7.97    | 0      | 0      | 0     | 0      | 0.009  | 0.0379 |
| 191 | Black / African American | female | 3.86585 | 7.55    | 0      | 0      | 0     | 0      | 0.0178 | 0.0002 |
| 192 | Black / African American | male   | 5.18275 | 1324.61 | 1.742  | 0      | 2.237 | 22.781 | 2.4582 | 2.4551 |
| 193 | Black / African American | female | 4.47365 | 13.58   | 0      | 0      | 0     | 0      | 0.0051 | 0.0173 |
| 194 | Hispanic                 | male   | 2.05339 | 5.85    | 0.281  | 0.5964 | 0.046 | 0.009  | 0.1765 | 0.0788 |
| 195 | Hispanic                 | female | 0.75838 | 22.26   | 0      | 0      | 0     | 0      | 0.0091 | 0      |
| 196 | Black / African American | male   | 3.68515 | 89.43   | 0      | 0      | 0     | 0      | 0.0132 | 0.0361 |
| 197 | Black / African American | male   | 0.62971 | 7.27    | 0      | 0      | 0     | 0      | 0.014  | 0.0049 |
| 198 | Hispanic                 | female | 0.55305 | 62.42   | 0      | 0      | 0     | 0.002  | 0.0173 | 0.0322 |
| 199 | Hispanic                 | female | 0.85421 | 17.85   | 0.008  | 0      | 0.008 | 0.226  | 0.1448 | 0.0213 |
| 200 | Hispanic                 | female | 3.74538 | 832.2   | 0.802  | 0      | 1.935 | 32.524 | 3.3967 | 0.6315 |
| 201 | Hispanic                 | female | 1.05407 | 72.52   | 33.211 | 0      | 0.004 | 0.091  | 0.0542 | 0.0712 |
| 202 | Hispanic                 | male   | 1.16632 | 10.06   | 0.005  | 0      | 0.009 | 0.012  | 0.0277 | 0.0184 |
| 203 | Black / African American | female | 1.67283 | 3.9     | 0.005  | 0      | 0.007 | 0.002  | 0.0007 | 0.0367 |
| 204 | Black / African American | male   | 0.50376 | 2.39    | 0      | 0      | 0     | 0      | 0.0005 | 0.0399 |
| 205 | Black / African American | male   | 5.08693 | 247.58  | 0.023  | 0      | 1.265 | 0.015  | 0.0575 | 0.0711 |
| 206 | Black / African American | male   | 2.00411 | 41.79   | 0.02   | 0.0068 | 0.015 | 0.004  | 0.0103 | 0.0882 |
| 207 | Black / African American | male   | 0.72279 | 11.42   | 0.005  | 0      | 0.012 | 0.099  | 0.0215 | 0.0126 |
| 208 | Cap Verdean              | male   | 1.02669 | 28.31   | 0.007  | 0      | 0.01  | 0.025  | 0.0268 | 0.0215 |
| 209 | Caribbean                | male   | 0.59138 | 1.56    | 0      | 0      | 0     | 0      | 0.0177 | 0.0097 |
| 210 | Black / African American | female | 2.67488 | 4.75    | 0.011  | 0      | 0.004 | 0.006  | 0.0098 | 0.0998 |
| 211 | Hispanic                 | female | 5.01848 | 20.28   | 0.007  | 0      | 0.011 | 0.003  | 0.059  | 0.0504 |
| 212 | Hispanic                 | female | 0.50103 | 2.74    | 0      | 0      | 0     | 0      | 0.0052 | 0.0291 |
| 213 | Black / African American | male   | 4.08761 | 127.82  | 0.012  | 0      | 0.028 | 0      | 0.0221 | 0.0336 |

|     |                          |        |         |        |       |         |       |       |        |        |
|-----|--------------------------|--------|---------|--------|-------|---------|-------|-------|--------|--------|
| 214 | Black / African American | male   | 1.32512 | 20.7   | 0.006 | 0       | 0.013 | 0.005 | 0.0091 | 0.0377 |
| 215 | Hispanic                 | male   | 1.00205 | 5.14   | 0.009 | 0       | 0     | 0     | 0.0159 | 0.0244 |
| 216 | Black / African American | male   | 1.93018 | 0.76   | 0.005 | 0       | 0.012 | 0.001 | 0.0088 | 0.1034 |
| 217 | White                    | female | 1.57153 | 10.59  | 0.009 | 0       | 0.011 | 0.005 | 0.0065 | 0.0611 |
| 218 | White                    | female | 1.23477 | 6.63   | 0.008 | 0       | 0.006 | 0     | 0.0022 | 0.027  |
| 219 | Black / African American | female | 1.51403 | 36.66  | 0.024 | 0       | 0.029 | 0.012 | 0.016  | 0.0918 |
| 220 | Black / African American | male   | 0.55305 | 7.52   | 0     | 0       | 0     | 0     | 0.0043 | 0      |
| 221 | Black / African American | male   | 0.62697 | 8.38   | 0.009 | 0       | 0.013 | 0.008 | 0.0151 | 0.1168 |
| 222 | Hispanic                 | female | 0.51198 | 3.81   | 0     | 0       | 0     | 0     | 0.0053 | 0.0298 |
| 223 | Black / African American | female | 4.48734 | 81.96  | 0.013 | 0       | 0.023 | 0.003 | 0.0397 | 0.0133 |
| 224 | Black / African American | female | 5.3744  | 15.06  | 0.007 | 0       | 0.006 | 0.001 | 0.0055 | 0.0619 |
| 225 | Unknown                  | male   | 1.05681 | 6.15   | 0.006 | 0       | 0.002 | 0     | 0.011  | 0.0284 |
| 226 | Black / African American | male   | 4.58042 | 113.82 | 0.006 | 0       | 0.016 | 0.007 | 0.0418 | 0.0364 |
| 227 | Hispanic                 | male   | 2.00684 | 15.56  | 0.029 | 0       | 0.014 | 0.058 | 0.0173 | 0.0874 |
| 228 | Black / African American | male   | 2.04244 | 11.86  | 0.091 | 0.053   | 0.04  | 0.088 | 0.0971 | 0.0951 |
| 229 | Unknown                  | male   | 0.84326 | 9.73   | 0.014 | 0       | 0.015 | 0.002 | 0.0138 | 0.0352 |
| 230 | White                    | female | 0.56126 | 0.03   | 0     | 0       | 0     | 0     | 0.0144 | 0.0133 |
| 231 | Black / African American | female | 1.2512  | 4.54   | 0.007 | 0       | 0.002 | 0.005 | 0.0046 | 0.1118 |
| 232 | Black / African American | male   | 0.79671 | 7.27   | 0.009 | 0       | 0.022 | 0.015 | 0.0184 | 0.0499 |
| 233 | Hispanic                 | female | 0.74196 | 12.32  | 0.019 | 0       | 0.007 | 0     | 0.0112 | 0.0254 |
| 234 | Hispanic                 | male   | 0.51198 | 6.2    | 0     | 0       | 0.036 | 0     | 0.0129 | 0.0049 |
| 235 | Black / African American | male   | 0.81862 | 83.23  | 0.014 | 0       | 0.02  | 0.009 | 0.0067 | 0.0328 |
| 236 | Black / African American | male   | 0.73648 | 0.01   | 0     | 0       | 0     | 0     | 0.0068 | 0.0262 |
| 237 | Black / African American | male   | 3.78919 | 1      | 0.007 | 0       | 0.012 | 0     | 0.0056 | 0.074  |
| 238 | Hispanic                 | male   | 0.79945 | 24.54  | 0.963 | 0       | 0.164 | 0.602 | 0.312  | 0.0278 |
| 239 | Black / African American | male   | 0.51472 | 0.85   | 0     | 0       | 0.002 | 0.001 | 0.0179 | 0.0411 |
| 240 | Black / African American | male   | 1.28679 | 188.85 | 0.028 | 0.0174  | 0.554 | 0.033 | 0.0549 | 0.0711 |
| 241 | Black / African American | male   | 4.74743 | 229.76 | 0.138 | 0       | 0.031 | 0.016 | 0.0561 | 0.0552 |
| 242 | Black / African American | female | 0.95277 | 7.16   | 0     | 0       | 0.009 | 0.007 | 0.0167 | 0.0343 |
| 243 | Black / African American | male   | 0.51198 | 10.52  | 0.011 | 0       | 0.002 | 0.008 | 0.0095 | 0.0224 |
| 244 | Black / African American | female | 6.12731 | 44.52  | 0.026 | 0.0045  | 0.022 | 0.007 | 0.03   | 0.0949 |
| 245 | Black / African American | male   | 0.76112 | 206.36 | 0.032 | 0       | 0.052 | 0.009 | 0.0242 | 0.0648 |
| 246 | Black / African American | female | 0.76112 | 171.33 | 0.025 | 0       | 0.318 | 0.014 | 0.0506 | 0.0335 |
| 247 | Black / African American | male   | 3.9206  | 38.2   | 0.029 | 0       | 0.073 | 0.103 | 0.0339 | 0.0395 |
| 248 | Black / African American | female | 4.39425 | 12.07  | 0.025 | 0       | 0     | 0     | 0.0224 | 0.0498 |
| 249 | White                    | male   | 0.78303 | 5.92   | 0.01  | 0       | 0.004 | 0.01  | 0.0118 | 0.0575 |
| 250 | Hispanic                 | female | 0.65435 | 8.01   | 0.011 | 0       | 0.005 | 0.004 | 0.0035 | 0.0228 |
| 251 | Black / African American | female | 0.53114 | 7.02   | 0.006 | 0       | 0.008 | 0     | 0.0012 | 0.0343 |
| 252 | Black / African American | female | 0.75565 | 5.53   | 0.008 | 0       | 0.004 | 0.002 | 0.0049 | 0.0649 |
| 253 | White                    | female | 1.60712 | 8.61   | 0.28  | 0.2972  | 0.046 | 0.077 | 0.2116 | 0.0764 |
| 254 | mixed                    | female | 0.7447  | 46.35  | 0.018 | 0.0047  | 0.015 | 0.045 | 0.0328 | 0.0984 |
| 255 | Black / African American | female | 5.28953 | 58.17  | 0.945 | 10.0486 | 0.006 | 0.002 | 0.0254 | 0.1283 |
| 256 | Hispanic                 | male   | 1.03491 | 9.89   | 0.009 | 0       | 0.001 | 0     | 0.0043 | 0.1142 |
| 257 | Black / African American | female | 5.32786 | 23.17  | 0.035 | 0.095   | 0     | 0     | 0.0367 | 0.0628 |

|     |                          |        |         |        |        |        |       |       |        |        |
|-----|--------------------------|--------|---------|--------|--------|--------|-------|-------|--------|--------|
| 258 | Hispanic                 | female | 3.77823 | 1.32   | 0      | 0      | 0     | 0     | 0.0023 | 0.0189 |
| 259 | Black / African American | male   | 5.37988 | 16.1   | 0.007  | 0      | 0     | 0.005 | 0.0107 | 0.0809 |
| 260 | Black / African American | male   | 3.99179 | 9.32   | 0      | 0      | 0     | 0     | 0.0129 | 0.0439 |
| 261 | Black / African American | female | 5.24572 | 156.41 | 0.015  | 0.0022 | 0.022 | 0.051 | 0.0426 | 0.0991 |
| 262 | Black / African American | female | 4.42163 | 129.73 | 0.014  | 0      | 0.032 | 0.103 | 0.052  | 0.0436 |
| 263 | Hispanic                 | female | 4.02464 | 48.05  | 0      | 0      | 0     | 0     | 0.0081 | 0.0314 |
| 264 | Black / African American | female | 0.75838 | 13.5   | 0.004  | 0.002  | 0.006 | 0.004 | 0.0117 | 0.0718 |
| 265 | Black / African American | male   | 4.08761 | 10.88  | 0      | 0      | 0     | 0     | 0.0082 | 0.0262 |
| 266 | Black / African American | male   | 0.84873 | 12.86  | 0.006  | 0      | 0     | 0     | 0.0029 | 0.0723 |
| 267 | Black / African American | female | 0.54483 | 122.88 | 0.023  | 0.0016 | 0.016 | 0.015 | 0.0625 | 0.0702 |
| 268 | Cap Verdean              | male   | 3.51814 | 44.74  | 0.005  | 0      | 0.003 | 0.007 | 0.0045 | 0.0751 |
| 269 | Hispanic                 | male   | 0.73374 | 39.87  | 0.01   | 0.0019 | 0.01  | 0.011 | 0.0909 | 0.0871 |
| 270 | Hispanic                 | female | 0.76386 | 1.81   | 0.006  | 0      | 0.004 | 0.003 | 0.0162 | 0.0778 |
| 271 | Black / African American | male   | 3.74264 | 2.85   | 0      | 0      | 0     | 0     | 0.0078 | 0.023  |
| 272 | Black / African American | female | 0.6653  | 19.13  | 0.013  | 0      | 0.056 | 0.002 | 0.0112 | 0.0814 |
| 273 | Unknown                  | male   | 1.577   | 0      | 0      | 0      | 0.01  | 0     | 0.0076 | 0.0733 |
| 274 | Black / African American | male   | 4.81314 | 464    | 0.071  | 0.0311 | 0.057 | 0.026 | 0.17   | 0.1905 |
| 275 | Hispanic                 | female | 3.24983 | 11.59  | 0      | 0      | 0     | 0     | 0.006  | 0.0222 |
| 276 | Black / African American | female | 0.68172 | 17.06  | 0.016  | 0      | 0.004 | 0.001 | 0.0083 | 0.0507 |
| 277 | Hispanic                 | female | 0.89802 | 4.24   | 0.01   | 0      | 0.011 | 0     | 0.0104 | 0.0822 |
| 278 | Black / African American | male   | 1.06502 | 9.95   | 0.001  | 0      | 0.012 | 0     | 0.0003 | 0.0609 |
| 279 | Black / African American | female | 1.02669 | 17.25  | 0.014  | 0      | 0.012 | 0.016 | 0.0117 | 0.0964 |
| 280 | Black / African American | female | 0.77481 | 9.7    | 0.006  | 0      | 0.013 | 0     | 0.0052 | 0.08   |
| 281 | Black / African American | female | 3.1102  | 93.91  | 0      | 0      | 0     | 0     | 0.0305 | 0.007  |
| 282 | Black / African American | male   | 0.82957 | 8.56   | 0.009  | 0      | 0.015 | 0     | 0.0105 | 0.0982 |
| 283 | Black / African American | female | 3.09925 | 32.21  | 0      | 0      | 0     | 0     | 0.0171 | 0.017  |
| 284 | Black / African American | female | 3.71526 | 0      | 0      | 0      | 0     | 0     | 0.0055 | 0.0458 |
| 285 | Hispanic                 | female | 5.10062 | 18.5   | 0.501  | 0.8117 | 0.034 | 0     | 0.0033 | 0.0872 |
| 286 | Hispanic                 | female | 0.77207 | 48.39  | 0.01   | 0      | 0.016 | 0.036 | 0.0821 | 0.0584 |
| 287 | Black / African American | female | 0.75017 | 13.79  | 0.009  | 0      | 0.013 | 0.002 | 0.0129 | 0.092  |
| 288 | Black / African American | male   | 2.987   | 8.24   | 0      | 0      | 0     | 0     | 0.0113 | 0      |
| 289 | Black / African American | female | 0.97741 | 3.95   | 0.014  | 0      | 0.023 | 0     | 0.0025 | 0.0968 |
| 290 | Black / African American | male   | 0.9692  | 9.91   | 0.018  | 0      | 0.017 | 0.002 | 0.0095 | 0.0907 |
| 291 | Unknown                  | male   | 1.09514 | 42.41  | 0.041  | 0.0082 | 0.446 | 0.012 | 0.1712 | 0.1039 |
| 292 | Black / African American | male   | 4.01643 | 145.84 | 16.553 | 0      | 0.016 | 0.025 | 0.0918 | 0.0434 |
| 293 | Black / African American | female | 0.77481 | 12.05  | 0.021  | 0      | 0.02  | 0.004 | 0.0158 | 0.1095 |
| 294 | Hispanic                 | female | 3.49076 | 94.32  | 27.57  | 0      | 0.015 | 0     | 0.0384 | 0.031  |
| 295 | Hispanic                 | female | 4.68994 | 267.75 | 1.311  | 1.0436 | 0.027 | 0.026 | 0.0537 | 0.1423 |
| 296 | Black / African American | female | 0.74196 | 43.83  | 0.077  | 0.0521 | 0.057 | 0.015 | 0.0445 | 0.1158 |
| 297 | Cap Verdean              | female | 2.55441 | 17.11  | 0      | 0      | 0.023 | 0.3   | 0.767  | 0.0541 |
| 298 | Black / African American | female | 0.8104  | 3.19   | 0.018  | 0      | 0.011 | 0     | 0.0147 | 0.0717 |
| 299 | Black / African American | male   | 0.95277 | 2.9    | 0.002  | 0      | 0.02  | 0     | 0.014  | 0.0793 |
| 300 | Black / African American | male   | 3.00616 | 85.18  | 0      | 0      | 0.013 | 0.003 | 0.0425 | 0      |
| 301 | Black / African American | male   | 0.61328 | 6.55   | 0.017  | 0.0027 | 0.019 | 0.015 | 0.0167 | 0.0819 |

|     |                          |        |         |         |        |        |        |       |         |        |
|-----|--------------------------|--------|---------|---------|--------|--------|--------|-------|---------|--------|
| 302 | Black / African American | male   | 1.18001 | 9.4     | 0.013  | 0      | 0.019  | 0.009 | 0.0075  | 0.1123 |
| 303 | Black / African American | male   | 1.06776 | 28.68   | 0.013  | 0      | 0.012  | 0.002 | 0.024   | 0.08   |
| 304 | Black / African American | female | 2.63381 | 3.86    | 0.047  | 0      | 0.01   | 0     | 0.0415  | 0.0454 |
| 305 | Black / African American | female | 0.82136 | 23.86   | 0.011  | 0      | 0.02   | 0.01  | 0.0559  | 0.0526 |
| 306 | Black / African American | female | 1.01574 | 5.39    | 0.011  | 0      | 0.022  | 0.001 | 0.0106  | 0.0825 |
| 307 | Black / African American | male   | 0.74196 | 2.76    | 0.009  | 0      | 0.011  | 0.002 | 0.0081  | 0.0446 |
| 308 | Caribbean                | male   | 1.013   | 29.84   | 0.02   | 0      | 0.019  | 0.015 | 0.0318  | 0.0547 |
| 309 | Black / African American | male   | 3.19233 | 99.77   | 0.073  | 0      | 0.093  | 0.006 | 0.0217  | 0.0193 |
| 310 | Unknown                  | male   | 2.43121 | 24.7    | 0      | 0      | 0      | 0.049 | 0.0242  | 0.0422 |
| 311 | Hispanic                 | male   | 4.43258 | 3.05    | 0.008  | 0      | 0.021  | 0     | 0       | 0.0758 |
| 312 | Black / African American | female | 2.70773 | 1479.97 | 0.534  | 0      | 1.896  | 0.136 | 0.1236  | 0.0765 |
| 313 | Black / African American | male   | 0.7885  | 3.25    | 0.011  | 0      | 0.016  | 0.002 | 0.0148  | 0.0697 |
| 314 | Black / African American | female | 3.10198 | 95.38   | 0.042  | 0      | 0      | 0.003 | 0.0208  | 0.0189 |
| 315 | Black / African American | male   | 4.5065  | 2.44    | 0.006  | 0      | 0.014  | 0     | 0.0021  | 0.0831 |
| 316 | Cap Verdean              | female | 2.55168 | 18.2    | 0.044  | 0      | 0      | 0     | 0.02    | 0.0294 |
| 317 | Hispanic                 | male   | 2.31896 | 7.83    | 0.003  | 0      | 0.001  | 0     | 0.0427  | 0.0285 |
| 318 | Black / African American | female | 0.72827 | 56.31   | 0.033  | 0.021  | 0.038  | 0.083 | 0.0559  | 0.0631 |
| 319 | Hispanic                 | female | 3.27447 | 1356.78 | 108.31 | 0      | 4.994  | 0.464 | 0.708   | 0.0735 |
| 320 | Caribbean                | female | 0.55305 | 5.06    | 0.005  | 0      | 0.006  | 0.001 | 0.0078  | 0.0941 |
| 321 | Black / African American | female | 4.18344 | 28.78   | 0.011  | 0      | 0.013  | 0.006 | 0.0099  | 0.0749 |
| 322 | Black / African American | male   | 3.20329 | 58.53   | 0.025  | 0      | 0.005  | 0.011 | 0.0238  | 0.0325 |
| 323 | Black / African American | female | 3.03901 | 12.73   | 0      | 0      | 0      | 0     | 0.0048  | 0.0043 |
| 324 | Black / African American | female | 2.38741 | 11.79   | 0.004  | 0      | 0.002  | 0.005 | 0.0064  | 0.0241 |
| 325 | Hispanic                 | female | 2.06434 | 156.19  | 0.981  | 0      | 0.172  | 0.013 | 0.0561  | 0.0253 |
| 326 | Hispanic                 | female | 2.705   | 5.96    | 0      | 0      | 0      | 0     | 0.0482  | 0.0268 |
| 327 | Hispanic                 | male   | 2.43395 | 11.4    | 0      | 0      | 0      | 0     | 0.0106  | 0.0262 |
| 328 | Black / African American | female | 3.48802 | 201.11  | 0.038  | 0      | 0.034  | 0.059 | 0.0665  | 0.0407 |
| 329 | Hispanic                 | male   | 4.16153 | 41.42   | 0.227  | 0.1451 | 0.074  | 0.021 | 0.0693  | 0.0871 |
| 330 | Black / African American | male   | 4.65161 | 4.55    | 0.018  | 0.044  | 0.048  | 0.004 | 0.1566  | 0.0954 |
| 331 | Unknown                  | male   | 0.56126 | 1.67    | 0.011  | 0      | 0.018  | 0     | 0.0113  | 0.0782 |
| 332 | Black / African American | female | 3.01164 | 135.25  | 0.017  | 0      | 0.007  | 0.022 | 0.0803  | 0.024  |
| 333 | Hispanic                 | male   | 2.00958 | 12.15   | 0      | 0      | 0      | 0     | 0.0109  | 0.0253 |
| 334 | Cap Verdean              | female | 2.10815 | 26.57   | 0      | 0      | 0      | 0     | 0.0083  | 0.0607 |
| 335 | Black / African American | female | 3.15127 | 416.4   | 1.333  | 0      | 0.179  | 0.039 | 0.1318  | 0.0831 |
| 336 | Hispanic                 | female | 2.65024 | 38.28   | 0.008  | 0      | 0      | 0.132 | 0.2279  | 0.0318 |
| 337 | White                    | male   | 3.88227 | 0       | 0.011  | 0      | 0      | 0     | 0.007   | 0.0848 |
| 338 | Black / African American | female | 2.41752 | 432.14  | 2.925  | 0      | 0.52   | 0.034 | 0.436   | 0.0596 |
| 339 | Black / African American | male   | 3.55099 | 85.72   | 0.016  | 0.0093 | 0.008  | 0.008 | 0.0337  | 0.0927 |
| 340 | Black / African American | female | 2.00137 | 47.31   | 0.061  | 0      | 0      | 0     | 0.0148  | 0      |
| 341 | Black / African American | male   | 2.36003 | 26.23   | 0      | 0      | 0.015  | 0.04  | 0.0129  | 0.0113 |
| 342 | Black / African American | male   | 4.0219  | 1198.02 | 4.457  | 1.8313 | 101.49 | 49.27 | 13.3865 | 0.5908 |
| 343 | Hispanic                 | female | 4.02738 | 24.78   | 5.096  | 8.2311 | 0.019  | 0.015 | 0.0214  | 0.0734 |
| 344 | Black / African American | male   | 3.44695 | 21.22   | 0.006  | 0      | 0.005  | 0     | 0.0055  | 0.087  |
| 345 | Black / African American | female | 2.423   | 76.92   | 0.446  | 0      | 0.038  | 0     | 0.0224  | 0.0351 |

|     |                          |        |         |        |       |         |       |        |        |        |
|-----|--------------------------|--------|---------|--------|-------|---------|-------|--------|--------|--------|
| 346 | Black / African American | female | 2.01506 | 3.14   | 0.941 | 0       | 0.126 | 0.008  | 0.339  | 0.0843 |
| 347 | Black / African American | male   | 4.03285 | 35.98  | 0.022 | 0       | 0.014 | 0.011  | 0.0153 | 0.1047 |
| 348 | Black / African American | male   | 2.78166 | 47.39  | 0     | 0       | 0     | 0.103  | 0.0181 | 0.0559 |
| 349 | Black / African American | male   | 3.07461 | 12.23  | 0.13  | 0       | 0.049 | 0.001  | 0.01   | 0.0241 |
| 350 | Black / African American | female | 4.24093 | 14.41  | 0.01  | 0       | 0.008 | 0.005  | 0.0074 | 0.0709 |
| 351 | White                    | female | 3.04997 | 86.66  | 0.023 | 0       | 0.016 | 0.029  | 0.031  | 0.0556 |
| 352 | Black / African American | female | 2.57084 | 11.8   | 0     | 0       | 0     | 0.017  | 0.016  | 0.0204 |
| 353 | Black / African American | female | 2.84189 | 160.64 | 0.766 | 0       | 0.37  | 0.646  | 0.8717 | 0.092  |
| 354 | Black / African American | female | 3.01711 | 21.06  | 0.015 | 0       | 0.005 | 0.005  | 0.0067 | 0.0386 |
| 355 | Black / African American | female | 1.76318 | 26.15  | 0     | 0       | 0     | 0.019  | 0.0297 | 0.0266 |
| 356 | Black / African American | female | 3.21424 | 44.38  | 0.001 | 0       | 0.004 | 0.032  | 0.0153 | 0.0379 |
| 357 | Black / African American | male   | 4.02464 | 37.27  | 0.013 | 0       | 0.007 | 0.431  | 0.042  | 0.1473 |
| 358 | Black / African American | male   | 2.51608 | 10.34  | 0.197 | 0       | 0     | 0      | 0.0088 | 0      |
| 359 | Black / African American | female | 1.90281 | 71.63  | 0.045 | 0       | 0     | 0      | 0.0205 | 0.0314 |
| 360 | Black / African American | male   | 1.74949 | 273.18 | 0.018 | 0       | 0.211 | 0.046  | 0.1137 | 0      |
| 361 | Unknown                  | female | 2.16564 | 23.94  | 0     | 0       | 0.015 | 0      | 0.0128 | 0.0122 |
| 362 | Black / African American | male   | 3.8987  | 4.89   | 0.015 | 0       | 0.009 | 0.004  | 0.0058 | 0.1041 |
| 363 | Black / African American | female | 3.68241 | 0      | 0.034 | 0.0095  | 0.012 | 0.003  | 0.0221 | 0.1464 |
| 364 | Cap Verdean              | female | 3.62765 | 173.41 | 8.614 | 10.2382 | 0.036 | 0.063  | 0.0304 | 0.1373 |
| 365 | Black / African American | female | 2.57084 | 20.39  | 0.003 | 0       | 0.002 | 0      | 0.0155 | 0.0135 |
| 366 | Black / African American | female | 4.29569 | 0      | 0     | 0       | 0     | 0      | 0.0061 | 0.0605 |
| 367 | Hispanic                 | female | 2.17659 | 145.8  | 0.012 | 0       | 0.004 | 0      | 0.0321 | 0.0475 |
| 368 | Hispanic                 | male   | 1.99042 | 0.43   | 0     | 0       | 0     | 0      | 0.0113 | 0.0285 |
| 369 | Hispanic                 | female | 1.54962 | 8.75   | 0     | 0       | 0     | 0.002  | 0.0249 | 0.0379 |
| 370 | Black / African American | male   | 3.39767 | 125.87 | 1.25  | 0.6599  | 0.164 | 0.02   | 0.0253 | 0.0939 |
| 371 | Black / African American | male   | 4.19713 | 128.43 | 0.016 | 0       | 0.013 | 0.007  | 0.0288 | 0.0859 |
| 372 | Black / African American | female | 3.99452 | 18.38  | 0.012 | 0       | 0.016 | 0.006  | 0.0145 | 0.09   |
| 373 | Hispanic                 | female | 1.50582 | 20.97  | 0     | 0       | 0.009 | 0.01   | 0.0361 | 0.0355 |
| 374 | Hispanic                 | female | 1.45106 | 1224.3 | 0.161 | 0       | 2.728 | 0.396  | 0.5771 | 0.0677 |
| 375 | Black / African American | male   | 1.43463 | 3.01   | 0     | 0       | 0     | 0      | 0.0179 | 0.01   |
| 376 | Black / African American | female | 3.19781 | 66.29  | 0.02  | 0.0014  | 0.006 | 0.004  | 0.0068 | 0.1222 |
| 377 | Asian/Pacific            | male   | 1.52498 | 5.26   | 0     | 0       | 0     | 0      | 0.0103 | 0.0283 |
| 378 | Hispanic                 | male   | 3.26078 | 916.75 | 0.212 | 0.4161  | 1.676 | 39.432 | 3.9975 | 0.1614 |
| 379 | Black / African American | male   | 1.50582 | 28.38  | 0     | 0       | 0     | 0      | 0.0249 | 0.016  |
| 380 | Black / African American | male   | 3.14305 | 1.01   | 0.001 | 0       | 0     | 0      | 0.0032 | 0.0917 |
| 381 | Black / African American | male   | 1.82341 | 5.69   | 0     | 0       | 0     | 0      | 0.0049 | 0.01   |
| 382 | Black / African American | male   | 3.49624 | 24.42  | 0.175 | 0.0926  | 0.024 | 0      | 0.0094 | 0.1326 |
| 383 | Black / African American | female | 3.43326 | 110.45 | 6.67  | 20.7629 | 0.573 | 0.073  | 0.0769 | 0.1235 |
| 384 | Black / African American | male   | 2.00411 | 271.4  | 0.012 | 0       | 0.024 | 0.058  | 0.0538 | 0.0083 |
| 385 | Cap Verdean              | female | 1.69747 | 19.17  | 0.076 | 0       | 0     | 0      | 0.0141 | 0.0367 |
| 386 | Asian/Pacific            | male   | 2.00958 | 12.66  | 0     | 0       | 0     | 0      | 0.0056 | 0.0044 |
| 387 | Hispanic                 | male   | 1.29227 | 13.17  | 0     | 0       | 0     | 0      | 0.001  | 0.0597 |
| 388 | Hispanic                 | male   | 1.71663 | 13.57  | 0.359 | 0       | 0.074 | 0      | 0.0991 | 0.0292 |
| 389 | Hispanic                 | male   | 1.23751 | 7.58   | 0.049 | 0       | 0.029 | 0      | 0.0557 | 0.0256 |

|     |                          |        |         |         |       |        |       |       |        |        |
|-----|--------------------------|--------|---------|---------|-------|--------|-------|-------|--------|--------|
| 390 | Hispanic                 | male   | 3.11567 | 10.85   | 0.026 | 0.0041 | 0.017 | 0.011 | 0.0126 | 0.0965 |
| 391 | Hispanic                 | male   | 1.79877 | 13.14   | 0.006 | 0      | 0.02  | 0     | 0.0687 | 0.0094 |
| 392 | Black / African American | male   | 1.54689 | 10.29   | 0.001 | 0      | 0     | 0     | 0.0083 | 0.0287 |
| 393 | Black / African American | female | 1.13895 | 7.05    | 0     | 0      | 0     | 0     | 0.0103 | 0.066  |
| 394 | Hispanic                 | female | 1.0924  | 18.02   | 0.019 | 0      | 0.01  | 0     | 0.0082 | 0.029  |
| 395 | Black / African American | female | 1.33607 | 110.88  | 0     | 0      | 0     | 0     | 0.0176 | 0.0521 |
| 396 | Black / African American | male   | 3.02259 | 14.8    | 0.025 | 0.0133 | 0.032 | 0.015 | 0.0238 | 0.1234 |
| 397 | Black / African American | male   | 1.59343 | 176.12  | 1.005 | 0      | 1.507 | 2.516 | 0.1652 | 0.3643 |
| 398 | Black / African American | male   | 1.99316 | 195.47  | 0.653 | 0      | 0.229 | 0.024 | 0.0669 | 0.0296 |
| 399 | Black / African American | female | 0.97194 | 80.96   | 0     | 0      | 0.011 | 0     | 0.021  | 0.0186 |
| 400 | Black / African American | female | 2.20945 | 232.8   | 0.021 | 0      | 0.039 | 0.027 | 0.137  | 0.0418 |
| 401 | White                    | female | 1.08145 | 27.94   | 0     | 0      | 0.001 | 0     | 0.017  | 0.0219 |
| 402 | Cap Verdean              | female | 1.81793 | 24.79   | 0     | 0      | 0     | 0     | 0.0056 | 0.0176 |
| 403 | Black / African American | female | 3.01711 | 1280.08 | 2.429 | 1.6734 | 7.718 | 0.112 | 1.0838 | 0.1533 |
| 404 | Black / African American | male   | 1.00205 | 20.54   | 0     | 0      | 0     | 0     | 0.015  | 0      |
| 405 | Hispanic                 | female | 1.1937  | 493.78  | 0.049 | 0      | 0.239 | 1.172 | 1.2583 | 0.0678 |
| 406 | Black / African American | female | 1.15537 | 475.66  | 0.096 | 0      | 0.252 | 0.093 | 0.2556 | 0.0907 |
| 407 | Black / African American | male   | 1.86995 | 57.23   | 0.011 | 0      | 0.011 | 0.003 | 0.0212 | 0.0543 |
| 408 | Black / African American | male   | 2.30253 | 285.75  | 0.018 | 0.0128 | 0.086 | 0.008 | 0.0172 | 0.088  |
| 409 | Black / African American | female | 1.50034 | 17.88   | 0     | 0      | 0     | 0     | 0.0123 | 0.0076 |
| 410 | White                    | male   | 2.00411 | 7.29    | 0.006 | 0      | 0.013 | 0.008 | 0.0075 | 0.0342 |
| 411 | Black / African American | male   | 0.91718 | 6.56    | 0.006 | 0      | 0.017 | 0     | 0.0223 | 0.0817 |
| 412 | Hispanic                 | female | 1.74127 | 43.41   | 0.009 | 0      | 0.025 | 0.006 | 0.0107 | 0.0199 |
| 413 | Cap Verdean              | male   | 1.21013 | 16.07   | 0.003 | 0      | 0     | 0     | 0.014  | 0.0435 |
| 414 | Hispanic                 | male   | 2.77344 | 0.32    | 0.035 | 0.0091 | 0.01  | 0     | 0.1228 | 0.1318 |
| 415 | White                    | male   | 0.56674 | 33.3    | 0.009 | 0      | 0.005 | 0.017 | 0.0365 | 0.0266 |
| 416 | Unknown                  | female | 1.03765 | 2.36    | 0     | 0      | 0     | 0     | 0.0045 | 0.0074 |
| 417 | Black / African American | female | 2.00137 | 1.36    | 0.008 | 0      | 0     | 0.004 | 0.0051 | 0.062  |
| 418 | Black / African American | female | 1.27036 | 137.39  | 0.003 | 0      | 0.194 | 0.054 | 0.1652 | 0.0143 |
| 419 | Asian/Pacific            | female | 1.47296 | 12.53   | 0     | 0      | 0     | 0     | 0.0055 | 0.0222 |
| 420 | White                    | female | 0.82409 | 6.91    | 0     | 0      | 0     | 0     | 0.0145 | 0.0265 |
| 421 | Black / African American | female | 2.07529 | 0       | 0     | 0      | 0     | 0     | 0.0045 | 0.007  |
| 422 | Caribbean                | female | 0.61054 | 0.08    | 0     | 0      | 0     | 0     | 0.0041 | 0.0261 |
| 423 | Black / African American | female | 1.56605 | 15.38   | 0.007 | 0      | 0.015 | 0.009 | 0.0201 | 0.0364 |
| 424 | Black / African American | male   | 2.13279 | 10.42   | 0.01  | 0      | 0.016 | 0     | 0.0219 | 0.0708 |
| 425 | Black / African American | female | 1.10335 | 16.88   | 0.006 | 0      | 0.005 | 0     | 0.0083 | 0.007  |
| 426 | Hispanic                 | female | 1.56879 | 5.42    | 0.005 | 0      | 0.01  | 0     | 0.0056 | 0.0369 |
| 427 | Hispanic                 | female | 0.74743 | 68.23   | 0.028 | 0.0093 | 0.055 | 0.011 | 0.0369 | 0.1079 |
| 428 | Hispanic                 | male   | 1.05955 | 4.57    | 0     | 0      | 0     | 0     | 0.0069 | 0      |
| 429 | Black / African American | female | 0.85695 | 0       | 0     | 0      | 0     | 0     | 0.0044 | 0.0234 |
| 430 | Black / African American | male   | 0.82136 | 57.75   | 0.013 | 0.0028 | 0.145 | 0.012 | 0.0214 | 0.0967 |
| 431 | Black / African American | female | 2.75975 | 12.6    | 0.011 | 0      | 0.01  | 0.004 | 0.0067 | 0.0973 |
| 432 | Black / African American | female | 1.54689 | 140.94  | 0.014 | 0      | 0.015 | 0.006 | 0.0179 | 0.0312 |
| 433 | Black / African American | female | 0.52293 | 9.19    | 0     | 0      | 0     | 0.004 | 0.0039 | 0.0487 |

|     |                          |        |         |        |       |        |       |        |        |        |
|-----|--------------------------|--------|---------|--------|-------|--------|-------|--------|--------|--------|
| 434 | Hispanic                 | male   | 1.60438 | 7.73   | 0.011 | 0      | 0.009 | 0      | 0.0103 | 0.0333 |
| 435 | Black / African American | female | 1.74127 | 89.15  | 0.547 | 0      | 0.027 | 0.02   | 0.0274 | 0.0589 |
| 436 | Black / African American | female | 2.29979 | 24.16  | 0.009 | 0      | 0.003 | 0.008  | 0.0098 | 0.0575 |
| 437 | Black / African American | female | 1.88912 | 25.92  | 0.009 | 0      | 0     | 0      | 0.0005 | 0.0523 |
| 438 | Black / African American | male   | 1.25667 | 52.47  | 0     | 0      | 0     | 0      | 0.0159 | 0.0118 |
| 439 | White                    | female | 0.61875 | 1.97   | 0     | 0      | 0.005 | 0      | 0.0095 | 0.0151 |
| 440 | Black / African American | female | 0.99932 | 51.9   | 0     | 0      | 0.006 | 0      | 0.0162 | 0      |
| 441 | Black / African American | male   | 0.50103 | 5.48   | 0     | 0      | 0     | 0      | 0.0185 | 0.0338 |
| 442 | Black / African American | female | 0.74196 | 1391.7 | 0.159 | 0      | 0.468 | 0.173  | 0.2261 | 0.0959 |
| 443 | Hispanic                 | female | 0.5859  | 4.55   | 0     | 0      | 0     | 0      | 0      | 0.0219 |
| 444 | Black / African American | female | 0.77481 | 12.94  | 0.03  | 0.0137 | 0.035 | 0.032  | 0.0299 | 0.0893 |
| 445 | Hispanic                 | female | 1.01027 | 31.12  | 0     | 0      | 0     | 0      | 0.0086 | 0.0282 |
| 446 | Cap Verdean              | female | 0.73101 | 8.39   | 0.019 | 0.0112 | 0.015 | 0.003  | 0.0107 | 0.1043 |
| 447 | Black / African American | male   | 0.55852 | 3.45   | 0     | 0      | 0     | 0      | 0.0058 | 0.0447 |
| 448 | Black / African American | male   | 1.1718  | 385.95 | 0.021 | 0      | 0.023 | 0.013  | 0.0332 | 0.0213 |
| 449 | Black / African American | male   | 1.00479 | 46.86  | 0     | 0      | 0.006 | 0      | 0.0066 | 0.0044 |
| 450 | Black / African American | male   | 0.75565 | 71.32  | 0     | 0      | 0     | 0      | 0.0457 | 0.0046 |
| 451 | Hispanic                 | female | 0.77755 | 5.07   | 0.001 | 0      | 0     | 0      | 0.0103 | 0.0339 |
| 452 | Hispanic                 | male   | 1.61807 | 28.15  | 0.018 | 0      | 0.014 | 0.006  | 0.0138 | 0.032  |
| 453 | Black / African American | male   | 1.34155 | 280.93 | 0.035 | 0      | 0.034 | 0.034  | 0.0545 | 0.032  |
| 454 | White                    | female | 0.55578 | 19.28  | 0     | 0      | 0.095 | 0      | 0.3801 | 0.0256 |
| 455 | White                    | female | 1.68378 | 14.51  | 0.11  | 0.1658 | 0.003 | 0.008  | 0.0047 | 0.0663 |
| 456 | Black / African American | male   | 1.53593 | 11.97  | 0.007 | 0      | 0.014 | 0.014  | 0.0097 | 0.021  |
| 457 | Black / African American | male   | 0.84326 | 80.26  | 0.007 | 0      | 0.009 | 0.002  | 0.0142 | 0.0313 |
| 458 | Black / African American | female | 1.00479 | 110.81 | 0     | 0      | 0.121 | 0.231  | 0.074  | 0.0201 |
| 459 | Black / African American | male   | 1.06776 | 40.31  | 0     | 0      | 0.027 | 0      | 0.0065 | 0.0401 |
| 460 | Black / African American | female | 0.75291 | 4.02   | 0     | 0      | 0     | 0      | 0.0056 | 0.0317 |
| 461 | Hispanic                 | female | 0.74196 | 1.35   | 0     | 0      | 0     | 0      | 0.0045 | 0.0224 |
| 462 | White                    | male   | 0.85695 | 0      | 0.016 | 0      | 0     | 0      | 0.0073 | 0.0852 |
| 463 | Hispanic                 | female | 0.75838 | 21.03  | 0     | 0      | 0     | 0      | 0.0289 | 0      |
| 464 | Black / African American | female | 0.59138 | 16.14  | 0     | 0      | 0     | 0      | 0.0103 | 0      |
| 465 | White                    | female | 0.78303 | 2.8    | 0     | 0      | 0     | 0      | 0.0026 | 0.0111 |
| 466 | Black / African American | male   | 1.20465 | 34.99  | 0.008 | 0      | 0.014 | 0.003  | 0.0154 | 0.0323 |
| 467 | Black / African American | female | 0.55305 | 245.15 | 0.709 | 0      | 0.098 | 20.365 | 0.6284 | 0.0389 |
| 468 | Black / African American | female | 1.02669 | 9.07   | 0.019 | 0      | 0.018 | 0.002  | 0.0044 | 0.0197 |
| 469 | Black / African American | female | 1.13895 | 17.97  | 0.006 | 0      | 0.008 | 0.009  | 0.0123 | 0.0202 |
| 470 | Black / African American | male   | 1.36619 | 7.74   | 0.009 | 0      | 0.007 | 0.001  | 0.0087 | 0.0231 |
| 471 | Black / African American | male   | 1.13895 | 47.94  | 0.005 | 0      | 0.005 | 0.007  | 0.0239 | 0.0374 |
| 472 | Black / African American | female | 1.2512  | 4.59   | 0.007 | 0      | 0.006 | 0      | 0.0075 | 0.0278 |
| 473 | Cap Verdean              | male   | 0.83504 | 65.5   | 0     | 0      | 0     | 0      | 0.0154 | 0.0224 |
| 474 | Black / African American | female | 1.48939 | 139.82 | 0.034 | 0.0318 | 0.086 | 0.018  | 0.0509 | 0.0741 |
| 475 | Unknown                  | male   | 0.76934 | 14.78  | 0.016 | 0      | 0.028 | 0.012  | 0.0279 | 0.0196 |
| 476 | Black / African American | female | 2.07803 | 29.64  | 0.021 | 0      | 0.069 | 0.007  | 0.3109 | 0.125  |
| 477 | Black / African American | female | 1.76044 | 13.62  | 0     | 0      | 0     | 0.063  | 0.0084 | 0.0386 |

|     |                          |        |         |        |       |        |       |        |        |        |
|-----|--------------------------|--------|---------|--------|-------|--------|-------|--------|--------|--------|
| 478 | Black / African American | male   | 0.75291 | 2.49   | 0.006 | 0      | 0     | 0.002  | 0.002  | 0.0823 |
| 479 | Black / African American | male   | 0.55031 | 24.63  | 0     | 0      | 0     | 0      | 0.01   | 0.0174 |
| 480 | Black / African American | female | 1.88638 | 15.75  | 0.001 | 0      | 0.007 | 0.109  | 0.1096 | 0.1126 |
| 481 | Black / African American | male   | 1.50308 | 0.03   | 0     | 0      | 0.001 | 0      | 0      | 0.0644 |
| 482 | Black / African American | male   | 0.64613 | 4.05   | 0.004 | 0      | 0.006 | 0      | 0.0148 | 0.0188 |
| 483 | Black / African American | female | 1.54415 | 361.98 | 0.632 | 0.6816 | 1.615 | 59.464 | 5.9    | 0.0747 |
| 484 | Black / African American | male   | 1.44011 | 85.77  | 0.02  | 0.0083 | 0.124 | 0.023  | 0.0759 | 0.0533 |
| 485 | Black / African American | female | 0.71732 | 4.76   | 0     | 0      | 0     | 0      | 0.0076 | 0.0277 |
| 486 | Black / African American | male   | 0.80219 | 35.68  | 0     | 0      | 0.016 | 0      | 0.0223 | 0.0221 |
| 487 | Hispanic                 | male   | 0.52019 | 2.22   | 0     | 0      | 0     | 0      | 0.009  | 0.0004 |
| 488 | Black / African American | female | 0.564   | 4.55   | 0     | 0      | 0     | 0      | 0.0051 | 0.0483 |
| 489 | Black / African American | female | 0.52567 | 14.33  | 0     | 0      | 0     | 0      | 0.008  | 0.0336 |
| 490 | Black / African American | male   | 1.013   | 0.82   | 0.017 | 0      | 0.005 | 0.001  | 0.0326 | 0.049  |
| 491 | Black / African American | male   | 0.87337 | 0.38   | 0.011 | 0      | 0     | 0      | 0.0269 | 0.0254 |
| 492 | Black / African American | female | 0.73922 | 9.34   | 0.003 | 0      | 0.009 | 0      | 0.0164 | 0.0312 |
| 493 | Black / African American | female | 0.54757 | 3.46   | 0     | 0      | 0     | 0      | 0.012  | 0.0199 |
| 494 | White                    | female | 0.62971 | 23.22  | 0.028 | 0      | 0.002 | 0.388  | 0.0396 | 0.0474 |
| 495 | Black / African American | male   | 0.75838 | 30.78  | 0.028 | 0      | 0.009 | 0.024  | 0.1105 | 0.0265 |
| 496 | Black / African American | male   | 0.89254 | 4.17   | 0.02  | 0      | 0.007 | 0.001  | 0.005  | 0.036  |
| 497 | Hispanic                 | female | 0.87337 | 130.47 | 0.03  | 0      | 0.138 | 0.089  | 0.0652 | 0.0801 |
| 498 | Black / African American | male   | 0.846   | 2.84   | 0.007 | 0      | 0.005 | 0      | 0.0057 | 0.0227 |
| 499 | Hispanic                 | male   | 1.05681 | 20.83  | 0.007 | 0      | 0.006 | 0.005  | 0.0227 | 0.0352 |
| 500 | Black / African American | male   | 0.76386 | 34.46  | 0.01  | 0      | 0.017 | 0.001  | 0.0143 | 0.0346 |
| 501 | Black / African American | male   | 1.22656 | 3.41   | 0.01  | 0      | 0.002 | 0      | 0.0033 | 0.0696 |
| 502 | Black / African American | female | 0.85695 | 112.59 | 0.016 | 0      | 0.016 | 0.003  | 0.017  | 0.0572 |
| 503 | Black / African American | male   | 0.7447  | 61.93  | 0.008 | 0      | 0.122 | 0.008  | 0.017  | 0.0269 |
| 504 | Hispanic                 | female | 0.77207 | 319.31 | 0.023 | 0.0187 | 0.061 | 0.032  | 0.1329 | 0.1092 |
| 505 | Black / African American | female | 1.25941 | 0.74   | 0.008 | 0      | 0.005 | 0      | 0.0069 | 0.0759 |
| 506 | Black / African American | female | 0.69815 | 65.26  | 0.003 | 0      | 0.022 | 0.005  | 0.0235 | 0.0239 |
| 507 | Black / African American | male   | 0.5065  | 125.01 | 0.012 | 0      | 0.025 | 0.016  | 0.0251 | 0.0316 |
| 508 | Hispanic                 | male   | 0.78576 | 15.2   | 0.221 | 0      | 0.028 | 0.003  | 0.0862 | 0.0316 |
| 509 | Hispanic                 | male   | 1.2512  | 7.38   | 0.001 | 0      | 0.001 | 0.003  | 0.0065 | 0.07   |
| 510 | White                    | male   | 0.71458 | 3.84   | 0.004 | 0      | 0.005 | 0      | 0.0015 | 0.0294 |
| 511 | Black / African American | female | 1.13073 | 261.23 | 0.028 | 0.0197 | 0.206 | 0.058  | 0.1301 | 0.1463 |
| 512 | Black / African American | female | 1.24298 | 10.57  | 0.005 | 0      | 0.089 | 0.003  | 0.0124 | 0.0753 |
| 513 | Black / African American | male   | 1.02943 | 26.53  | 0     | 0      | 0.002 | 0.001  | 0.0031 | 0.0795 |
| 514 | Asian/Pacific            | female | 0.83504 | 17.92  | 0.003 | 0      | 0.008 | 0.002  | 0.0114 | 0.0316 |
| 515 | Hispanic                 | male   | 1.32238 | 11.17  | 0.013 | 0      | 0.005 | 0      | 0.0005 | 0.1066 |
| 516 | Black / African American | female | 0.6872  | 9.2    | 0.01  | 0      | 0.002 | 0.025  | 0.0512 | 0.0255 |
| 517 | Cap Verdean              | male   | 1.68104 | 3.04   | 0.026 | 0.0125 | 0.001 | 0      | 0.0358 | 0.1232 |
| 518 | Black / African American | male   | 0.7666  | 73.86  | 0.011 | 0      | 0.082 | 0      | 0.019  | 0.0301 |
| 519 | Hispanic                 | female | 0.75565 | 37.96  | 0.013 | 0      | 0.018 | 0.007  | 0.0184 | 0.0328 |
| 520 | Black / African American | female | 0.50376 | 5.43   | 0.007 | 0      | 0.016 | 0.004  | 0.0143 | 0.013  |
| 521 | Black / African American | male   | 0.95551 | 25.27  | 0.007 | 0      | 0.036 | 0.002  | 0.0175 | 0.0648 |

|     |                          |        |         |        |       |        |       |       |        |        |
|-----|--------------------------|--------|---------|--------|-------|--------|-------|-------|--------|--------|
| 522 | Black / African American | female | 1.51951 | 29.81  | 0.031 | 0.0049 | 0.09  | 0.043 | 1.8659 | 1.4507 |
| 523 | Black / African American | female | 0.75017 | 5.06   | 0.016 | 0      | 0.012 | 0.004 | 0.004  | 0.0343 |
| 524 | Black / African American | female | 1.68378 | 41.89  | 0.034 | 0      | 0.013 | 0.005 | 0.1083 | 0.057  |
| 525 | Cap Verdean              | male   | 1.51951 | 90.6   | 0.078 | 0.0338 | 0.14  | 0.017 | 0.0332 | 0.0934 |
| 526 | Hispanic                 | male   | 0.53388 | 1.47   | 0.008 | 0      | 0.013 | 0     | 0.0036 | 0.0319 |
| 527 | Black / African American | female | 1.04038 | 7.99   | 0     | 0      | 0     | 0.004 | 0.0054 | 0.077  |
| 528 | Unknown                  | female | 0.58316 | 13.9   | 0.006 | 0      | 0.007 | 0.003 | 0.0116 | 0.0326 |
| 529 | Black / African American | male   | 0.50103 | 0.7    | 0.004 | 0      | 0.005 | 0     | 0.0015 | 0.0537 |
| 530 | Black / African American | female | 0.76112 | 13.31  | 0.008 | 0      | 0.015 | 0     | 0.0058 | 0.0422 |
| 531 | Black / African American | male   | 0.5065  | 3.1    | 0.006 | 0      | 0.007 | 0     | 0.0068 | 0.0219 |
| 532 | Black / African American | male   | 1.85079 | 1.33   | 0.003 | 0      | 0.014 | 0.002 | 0.0178 | 0.0571 |
| 533 | Asian/ Pacific           | female | 0.52841 | 7.91   | 0.011 | 0      | 0.005 | 0.004 | 0.0102 | 0.0259 |
| 534 | Unknown                  | female | 0.75838 | 15.85  | 0.006 | 0      | 0.066 | 0.037 | 0.0187 | 0.0666 |
| 535 | Black / African American | male   | 0.5859  | 0.25   | 0.001 | 0      | 0.002 | 0     | 0.0061 | 0.0365 |
| 536 | Black / African American | male   | 1.03491 | 127.41 | 0.131 | 0.0902 | 0.035 | 0.026 | 0.0478 | 0.0707 |
| 537 | Black / African American | female | 0.73374 | 25.96  | 0.003 | 0      | 0.032 | 0.004 | 0.003  | 0.085  |
| 538 | Hispanic                 | male   | 1.00205 | 14.85  | 0.015 | 0      | 0.008 | 0.002 | 0.0151 | 0.0629 |
| 539 | Black / African American | male   | 1.22108 | 3.33   | 0.011 | 0      | 0.018 | 0.006 | 0.0225 | 0.1075 |
| 540 | Hispanic                 | male   | 0.73374 | 25.31  | 0.006 | 0      | 0.019 | 0.001 | 0.0044 | 0.0584 |
| 541 | Black / African American | female | 1.74675 | 10.04  | 0.011 | 0      | 0.017 | 0.012 | 0.0224 | 0.0513 |
| 542 | Black / African American | female | 0.80493 | 41.63  | 0.01  | 0.0006 | 0.027 | 0.021 | 0.0207 | 0.0931 |
| 543 | Unknown                  | female | 1.10883 | 44.54  | 0.018 | 0      | 0.037 | 0.022 | 0.0841 | 0.0877 |
| 544 | Hispanic                 | male   | 0.46543 | 10.59  | 0.008 | 0      | 0.005 | 0.002 | 0.0078 | 0.0354 |
| 545 | Unknown                  | male   | 0.80493 | 26.5   | 0.008 | 0.0015 | 0.005 | 0.008 | 0.0198 | 0.1023 |
| 546 | Hispanic                 | female | 1.01574 | 18.61  | 0.006 | 0      | 0.004 | 0.007 | 0.0107 | 0.073  |
| 547 | White                    | male   | 0.59138 | 1.72   | 0.017 | 0      | 0.008 | 0     | 0.0073 | 0.0419 |
| 548 | Black / African American | female | 1.42916 | 23.71  | 0.003 | 0      | 0.048 | 0     | 0.0129 | 0.0701 |
| 549 | Black / African American | male   | 0.9911  | 3.49   | 0.01  | 0      | 0     | 0     | 0.0032 | 0.0859 |
| 550 | Asian/ Pacific           | male   | 0.54483 | 48.16  | 0.004 | 0      | 0.028 | 0.002 | 0.0108 | 0.0278 |
| 551 | Black / African American | male   | 1.04038 | 5.3    | 0.011 | 0      | 0     | 0.003 | 0.0142 | 0.1122 |
| 552 | Hispanic                 | male   | 1.03765 | 28.01  | 0.018 | 0.0077 | 0.021 | 0.008 | 0.0343 | 0.0877 |
| 553 | Black / African American | male   | 0.93087 | 0.68   | 0.015 | 0      | 0.001 | 0     | 0.0014 | 0.076  |
| 554 | Black / African American | male   | 0.82409 | 3.03   | 0.023 | 0.0198 | 0.016 | 0.012 | 0.0364 | 0.0802 |
| 555 | Black / African American | female | 1.58795 | 63.82  | 0.009 | 0      | 0.03  | 0.007 | 0.0383 | 0.053  |
| 556 | Black / African American | female | 1.01848 | 78.54  | 0.011 | 0.0021 | 0.051 | 0.013 | 0.038  | 0.1009 |
| 557 | Caribbean                | male   | 0.76386 | 9.75   | 0.002 | 0      | 0.004 | 0.001 | 0.0126 | 0.0696 |
| 558 | Black / African American | female | 1.31964 | 8.13   | 0.048 | 0.0422 | 0.016 | 0.001 | 0.0911 | 0.067  |
| 559 | Black / African American | female | 0.78303 | 43.09  | 0.013 | 0      | 0.008 | 0.008 | 0.0275 | 0.1116 |
| 560 | Hispanic                 | female | 1.01848 | 16.27  | 0.017 | 0.0068 | 0.022 | 0.017 | 0.0505 | 0.059  |
| 561 | Black / African American | female | 0.57769 | 2.18   | 0.018 | 0.007  | 0.008 | 0.01  | 0.0183 | 0.0685 |
| 562 | Black / African American | male   | 0.79945 | 4.28   | 0.006 | 0      | 0.006 | 0     | 0.0008 | 0.0749 |
| 563 | Black / African American | male   | 0.83231 | 2.98   | 0.014 | 0      | 0.008 | 0     | 0.0075 | 0.1028 |
| 564 | Black / African American | female | 1.01848 | 47.84  | 0.06  | 0.0647 | 0.023 | 0.017 | 0.3284 | 0.1182 |
| 565 | White                    | male   | 0.97741 | 5.47   | 0.018 | 0      | 0.016 | 0.003 | 0.0101 | 0.0979 |

|     |                          |        |         |        |       |        |       |        |        |        |
|-----|--------------------------|--------|---------|--------|-------|--------|-------|--------|--------|--------|
| 566 | Black / African American | female | 0.66804 | 41.46  | 0.035 | 0.011  | 0.023 | 0.051  | 0.0448 | 0.0609 |
| 567 | Hispanic                 | female | 0.65708 | 622    | 0.449 | 0.3516 | 0.675 | 48.014 | 1.865  | 0.0787 |
| 568 | Black / African American | male   | 0.86242 | 94.11  | 0.017 | 0.0045 | 0.133 | 0.015  | 0.0832 | 0.0839 |
| 569 | Black / African American | male   | 1.38261 | 7.51   | 0.01  | 0      | 0.013 | 0      | 0.011  | 0.0683 |
| 570 | Black / African American | male   | 0.74196 | 7.59   | 0.013 | 0      | 0.002 | 0.014  | 0.0137 | 0.0942 |
| 571 | Cap Verdean              | male   | 0.72005 | 15.64  | 0.01  | 0      | 0.004 | 0.003  | 0.005  | 0.0736 |
| 572 | Cap Verdean              | male   | 0.79398 | 6.55   | 0.01  | 0      | 0.007 | 0.002  | 0.0055 | 0.0993 |
| 573 | Black / African American | female | 0.98563 | 79.33  | 0.069 | 0.0582 | 0.064 | 0.079  | 0.1642 | 0.1036 |
| 574 | Black / African American | female | 0.51745 | 5.85   | 0.007 | 0      | 0.006 | 0.001  | 0.0158 | 0.08   |
| 575 | Black / African American | male   | 1.4976  | 3.36   | 0.001 | 0      | 0.005 | 0      | 0.01   | 0.0758 |
| 576 | White                    | male   | 0.75565 | 7.19   | 0.007 | 0      | 0.006 | 0      | 0.0032 | 0.1095 |
| 577 | Hispanic                 | female | 1.10883 | 21.13  | 0.028 | 0      | 0.028 | 0.009  | 0.0134 | 0.0749 |
| 578 | Hispanic                 | female | 1.01574 | 201.69 | 5.645 | 2.8827 | 1.317 | 0.629  | 0.9374 | 1.3748 |
| 579 | Hispanic                 | male   | 0.76112 | 1.38   | 0.004 | 0      | 0.008 | 0.003  | 0.0114 | 0.0855 |
| 580 | Black / African American | male   | 0.8679  | 127.66 | 0.033 | 0.0131 | 0.047 | 0.014  | 0.0398 | 0.1378 |
| 581 | Black / African American | female | 0.75291 | 50.13  | 0.012 | 0.0035 | 0.019 | 0.011  | 0.0328 | 0.0567 |
| 582 | Black / African American | female | 0.87337 | 4.76   | 0.022 | 0.0093 | 0.021 | 0.013  | 0.2345 | 0.1166 |
| 583 | Unknown                  | female | 0.53388 | 48.04  | 0.017 | 0.0003 | 0.025 | 0.026  | 0.1769 | 0.0705 |
| 584 | Unknown                  | male   | 0.73374 | 7.82   | 0.007 | 0      | 0.013 | 0.002  | 0.0094 | 0.1156 |
| 585 | Cap Verdean              | male   | 0.72827 | 7.3    | 0.006 | 0      | 0.008 | 0.002  | 0.0398 | 0.0644 |
| 586 | Black / African American | male   | 0.82957 | 5.96   | 0.024 | 0      | 0.022 | 0.008  | 0.0143 | 0.1468 |
| 587 | Hispanic                 | male   | 0.7447  | 1.52   | 0.013 | 0      | 0.004 | 0.003  | 0.0086 | 0.0916 |
| 588 | Hispanic                 | female | 0.5065  | 71.26  | 0.021 | 0      | 0.004 | 0.004  | 0.0212 | 0.0532 |
| 589 | Black / African American | female | 0.75017 | 2.93   | 0.018 | 0.0024 | 0.012 | 0.006  | 0.008  | 0.1296 |
| 590 | Black / African American | male   | 0.50103 | 10.64  | 0.006 | 0      | 0.009 | 0.001  | 0.0469 | 0.0932 |
| 591 | Unknown                  | female | 0.76934 | 12.85  | 0.025 | 0      | 0.014 | 0.007  | 0.0232 | 0.1323 |
| 592 | Black / African American | male   | 0.62149 | 9.66   | 0.01  | 0      | 0.014 | 0.004  | 0.0317 | 0.0756 |
| 593 | Cap Verdean              | male   | 0.75017 | 3.36   | 0.023 | 0      | 0.013 | 0.005  | 0.0108 | 0.0821 |
| 594 | Hispanic                 | female | 0.82957 | 10.15  | 0.007 | 0.192  | 0.007 | 0.682  | 0.093  | 0.0664 |
| 595 | Unknown                  | female | 0.78576 | 11.35  | 0.012 | 0      | 0.02  | 0.005  | 0.0133 | 0.0744 |
| 596 | Cap Verdean              | male   | 0.54209 | 11.91  | 0.013 | 0      | 0.01  | 0      | 0.0046 | 0.1199 |
| 597 | Hispanic                 | female | 0.98015 | 106.92 | 0.019 | 0      | 0.03  | 0.01   | 0.0384 | 0.0911 |
| 598 | Black / African American | male   | 1.25941 | 539.81 | 0.061 | 0.0355 | 1.474 | 0.075  | 0.1374 | 0.1908 |
| 599 | White                    | male   | 0.7091  | 47.34  | 0.028 | 0.0003 | 0.017 | 0.014  | 0.0266 | 0.0886 |
| 600 | Hispanic                 | female | 1.0705  | 66.68  | 0.034 | 0.0191 | 0.083 | 0.048  | 0.0642 | 0.0941 |
| 601 | Black / African American | female | 0.76386 | 9.05   | 0.022 | 0.157  | 0.035 | 0.013  | 0.0334 | 0.0829 |
| 602 | Black / African American | male   | 0.95825 | 190.23 | 0.04  | 0.0036 | 0.138 | 0.012  | 0.0852 | 0.038  |
| 603 | Black / African American | male   | 0.74743 | 15.32  | 0.035 | 0.1196 | 0.035 | 0.016  | 0.0359 | 0.0987 |
| 604 | Black / African American | female | 0.83504 | 51.74  | 0.019 | 0      | 0.018 | 0.007  | 0.0204 | 0.1102 |
| 605 | Black / African American | female | 1.12252 | 14.71  | 6.998 | 3.6258 | 0.016 | 0.017  | 0.0283 | 0.0653 |
| 606 | Black / African American | male   | 0.78029 | 3.85   | 0.011 | 0      | 0.001 | 0      | 0.013  | 0.1357 |
| 607 | Black / African American | male   | 1.05407 | 300.88 | 0.042 | 0.015  | 0.757 | 29.541 | 9.5016 | 0.0622 |
| 608 | Hispanic                 | female | 0.86516 | 14.62  | 0     | 0      | 0     | 0      | 0      | 0.0595 |
| 609 | Black / African American | male   | 1.08693 | 1.63   | 0.005 | 0      | 0.013 | 0      | 0.0087 | 0.0591 |

|            |                          |        |         |        |       |        |       |       |        |        |
|------------|--------------------------|--------|---------|--------|-------|--------|-------|-------|--------|--------|
| <b>610</b> | Hispanic                 | female | 0.78029 | 9.84   | 0.019 | 0      | 0.016 | 0.005 | 0.0074 | 0.0841 |
| <b>611</b> | Black / African American | female | 1.00479 | 7.04   | 0     | 0      | 0.01  | 0.002 | 0.016  | 0.0527 |
| <b>612</b> | Black / African American | male   | 0.73648 | 5.2    | 0.017 | 0.0006 | 0.012 | 0.006 | 0.0198 | 0.0733 |
| <b>613</b> | Cap Verdean              | male   | 1.01574 | 3.69   | 0     | 0      | 0.011 | 0.003 | 0.0094 | 0.1134 |
| <b>614</b> | Hispanic                 | male   | 0.51472 | 31.57  | 0.011 | 0      | 0.012 | 0.002 | 0.0158 | 0.1173 |
| <b>615</b> | Black / African American | male   | 0.92813 | 3.42   | 0.019 | 0      | 0.018 | 0     | 0.0067 | 0.0839 |
| <b>616</b> | White                    | female | 0.80767 | 1.69   | 0.005 | 0      | 0.009 | 0     | 0.0024 | 0.0629 |
| <b>617</b> | Hispanic                 | male   | 0.75017 | 2.84   | 0.008 | 0      | 0.013 | 0     | 0.0033 | 0.0761 |
| <b>618</b> | Black / African American | female | 0.97467 | 1.7    | 0.006 | 0      | 0.008 | 0.002 | 0.0145 | 0.0697 |
| <b>619</b> | Hispanic                 | male   | 1.04038 | 7.59   | 0.005 | 0      | 0.011 | 0     | 0.017  | 0.076  |
| <b>620</b> | Black / African American | female | 0.55031 | 0      | 0.011 | 0      | 0.009 | 0     | 0.0124 | 0.1619 |
| <b>621</b> | Black / African American | male   | 0.87885 | 3.5    | 0.013 | 0      | 0.012 | 0.002 | 0.0133 | 0.0845 |
| <b>622</b> | Black / African American | male   | 0.62971 | 9.84   | 0.007 | 0      | 0.012 | 0.002 | 0.0033 | 0.0781 |
| <b>623</b> | Cap Verdean              | female | 0.89254 | 30.5   | 0.012 | 0      | 0.013 | 0.005 | 0.0163 | 0.0791 |
| <b>624</b> | Black / African American | female | 0.50103 | 25.66  | 0.012 | 0.0023 | 0.035 | 0.005 | 0.0147 | 0.0691 |
| <b>625</b> | Cap Verdean              | male   | 0.75017 | 14.94  | 0.002 | 0      | 0.022 | 0     | 0.0269 | 0.0759 |
| <b>626</b> | Cap Verdean              | female | 0.75565 | 3.62   | 0.007 | 0      | 0.011 | 0     | 0.0037 | 0.1005 |
| <b>627</b> | Cap Verdean              | male   | 0.64887 | 22.44  | 0.01  | 0      | 0.031 | 0.018 | 0.0433 | 0.0779 |
| <b>628</b> | Hispanic                 | female | 0.75291 | 11.39  | 0.012 | 0      | 0.014 | 0.001 | 0.008  | 0.0855 |
| <b>629</b> | Hispanic                 | male   | 0.79945 | 0.61   | 0.004 | 0      | 0.006 | 0     | 0.0106 | 0.076  |
| <b>630</b> | Unknown                  | female | 0.77207 | 7.67   | 0.014 | 0      | 0.011 | 0.005 | 0.0293 | 0.0783 |
| <b>631</b> | Black / African American | female | 0.69268 | 114.68 | 0.017 | 0      | 0.051 | 0.009 | 0.1782 | 0.0896 |

**Table S3.** Children with one or multiple (2-6) allergens

| <b>No. of positive to tested allergens</b> | <b>No. of Subjects (207)</b> | <b>% of total population (100%)</b> |
|--------------------------------------------|------------------------------|-------------------------------------|
| <b>1</b>                                   | 100                          | 48.3                                |
| <b>2</b>                                   | 47                           | 22.7                                |
| <b>3</b>                                   | 25                           | 12.1                                |
| <b>4</b>                                   | 17                           | 8.2                                 |
| <b>5</b>                                   | 10                           | 4.8                                 |
| <b>6</b>                                   | 8                            | 3.9                                 |
